# Supplementary material for: Synthesis of Pyridin-1(2H)-ylacrylates and the Effects of Different Functional Groups on Their Fluorescence
Source: MDPI journal article supplement (doi:10.3390/molecules28186511), 2023-09-08

## Supporting Information for

# Synthesis of Pyridin-1(2*H*)-ylacrylates and the Effects of Different Functional Groups on their Fluorescence

Weiguang Yang <sup>1,\*</sup>, Danyang Luo <sup>1</sup>, Guanrong Li <sup>1</sup>, QiaoLi Luo <sup>2</sup>, Martin G. Banwell <sup>1,3,\*</sup> and Lanmei Chen <sup>1,\*</sup>

<sup>1</sup> Key Laboratory of Big Data Mining and Precision Drug Design of Guangdong Medical University, The Marine Biomedical Research Institute, Guangdong Medical University, Zhanjiang, 524023, China;

<sup>2</sup> School of Chemistry and Chemical Engineering, Lingnan Normal University, Zhanjiang 524048, P. R. China;

<sup>3</sup> Institute for Advanced and Applied Chemical Synthesis (IAACS), Jinan University, Guangzhou 510632/Zhuhai 519070, China

\*Correspondence: [09ywg@163.com](mailto:09ywg@163.com) (W.Y.); [martin.banwell@anu.edu.au](mailto:martin.banwell@anu.edu.au) (M.B.); [lanmeichen@126.com](mailto:lanmeichen@126.com) (L.C.).

## Table of Contents

|                                                                        |    |
|------------------------------------------------------------------------|----|
| 1. <sup>1</sup> H and <sup>13</sup> C{ <sup>1</sup> H}NMR Spectra..... | S2 |
|------------------------------------------------------------------------|----|

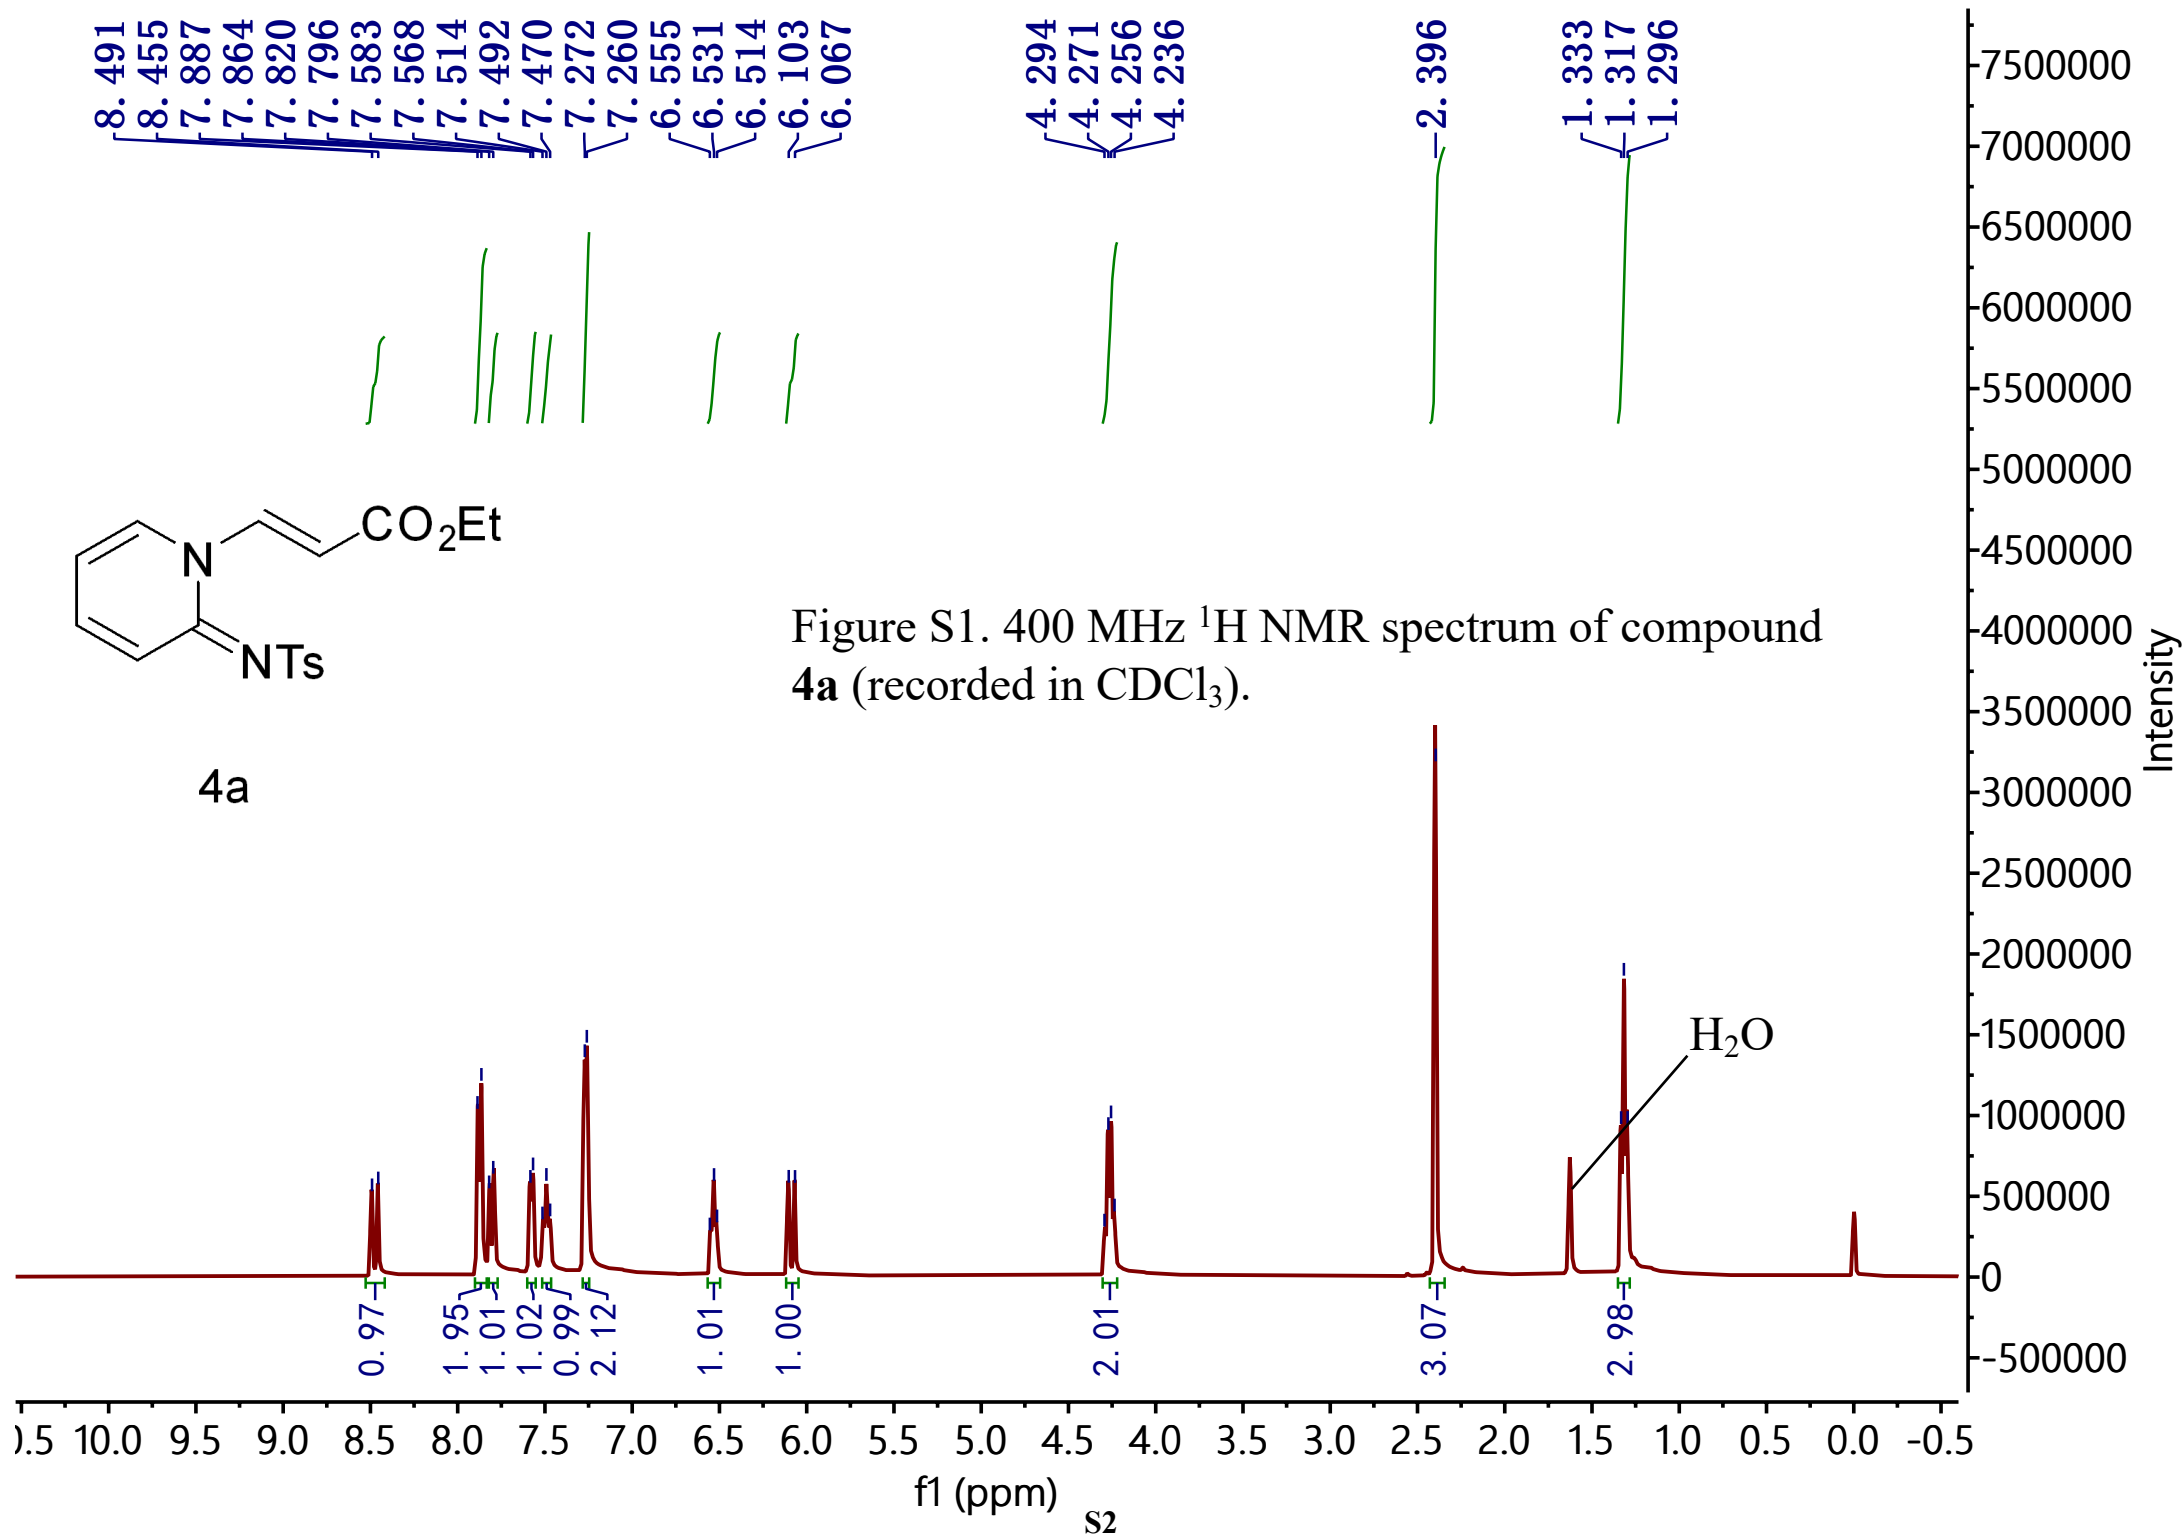

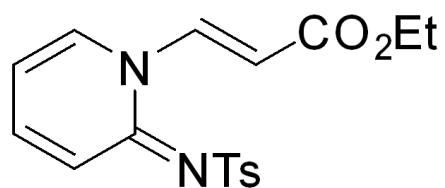

**4a**

-164.775  
 -155.124  
 142.508  
 140.706  
 140.479  
 140.312  
 133.641  
 129.400  
 126.544  
 119.327  
 114.332  
 111.063

77.477  
 77.159  
 76.841

-61.441

-21.608

-14.292

Figure S2. 100 MHz  $^{13}\text{C}\{^1\text{H}\}$  NMR spectrum of compound **4a** (recorded in  $\text{CDCl}_3$ ).

$\text{CDCl}_3$

Intensity

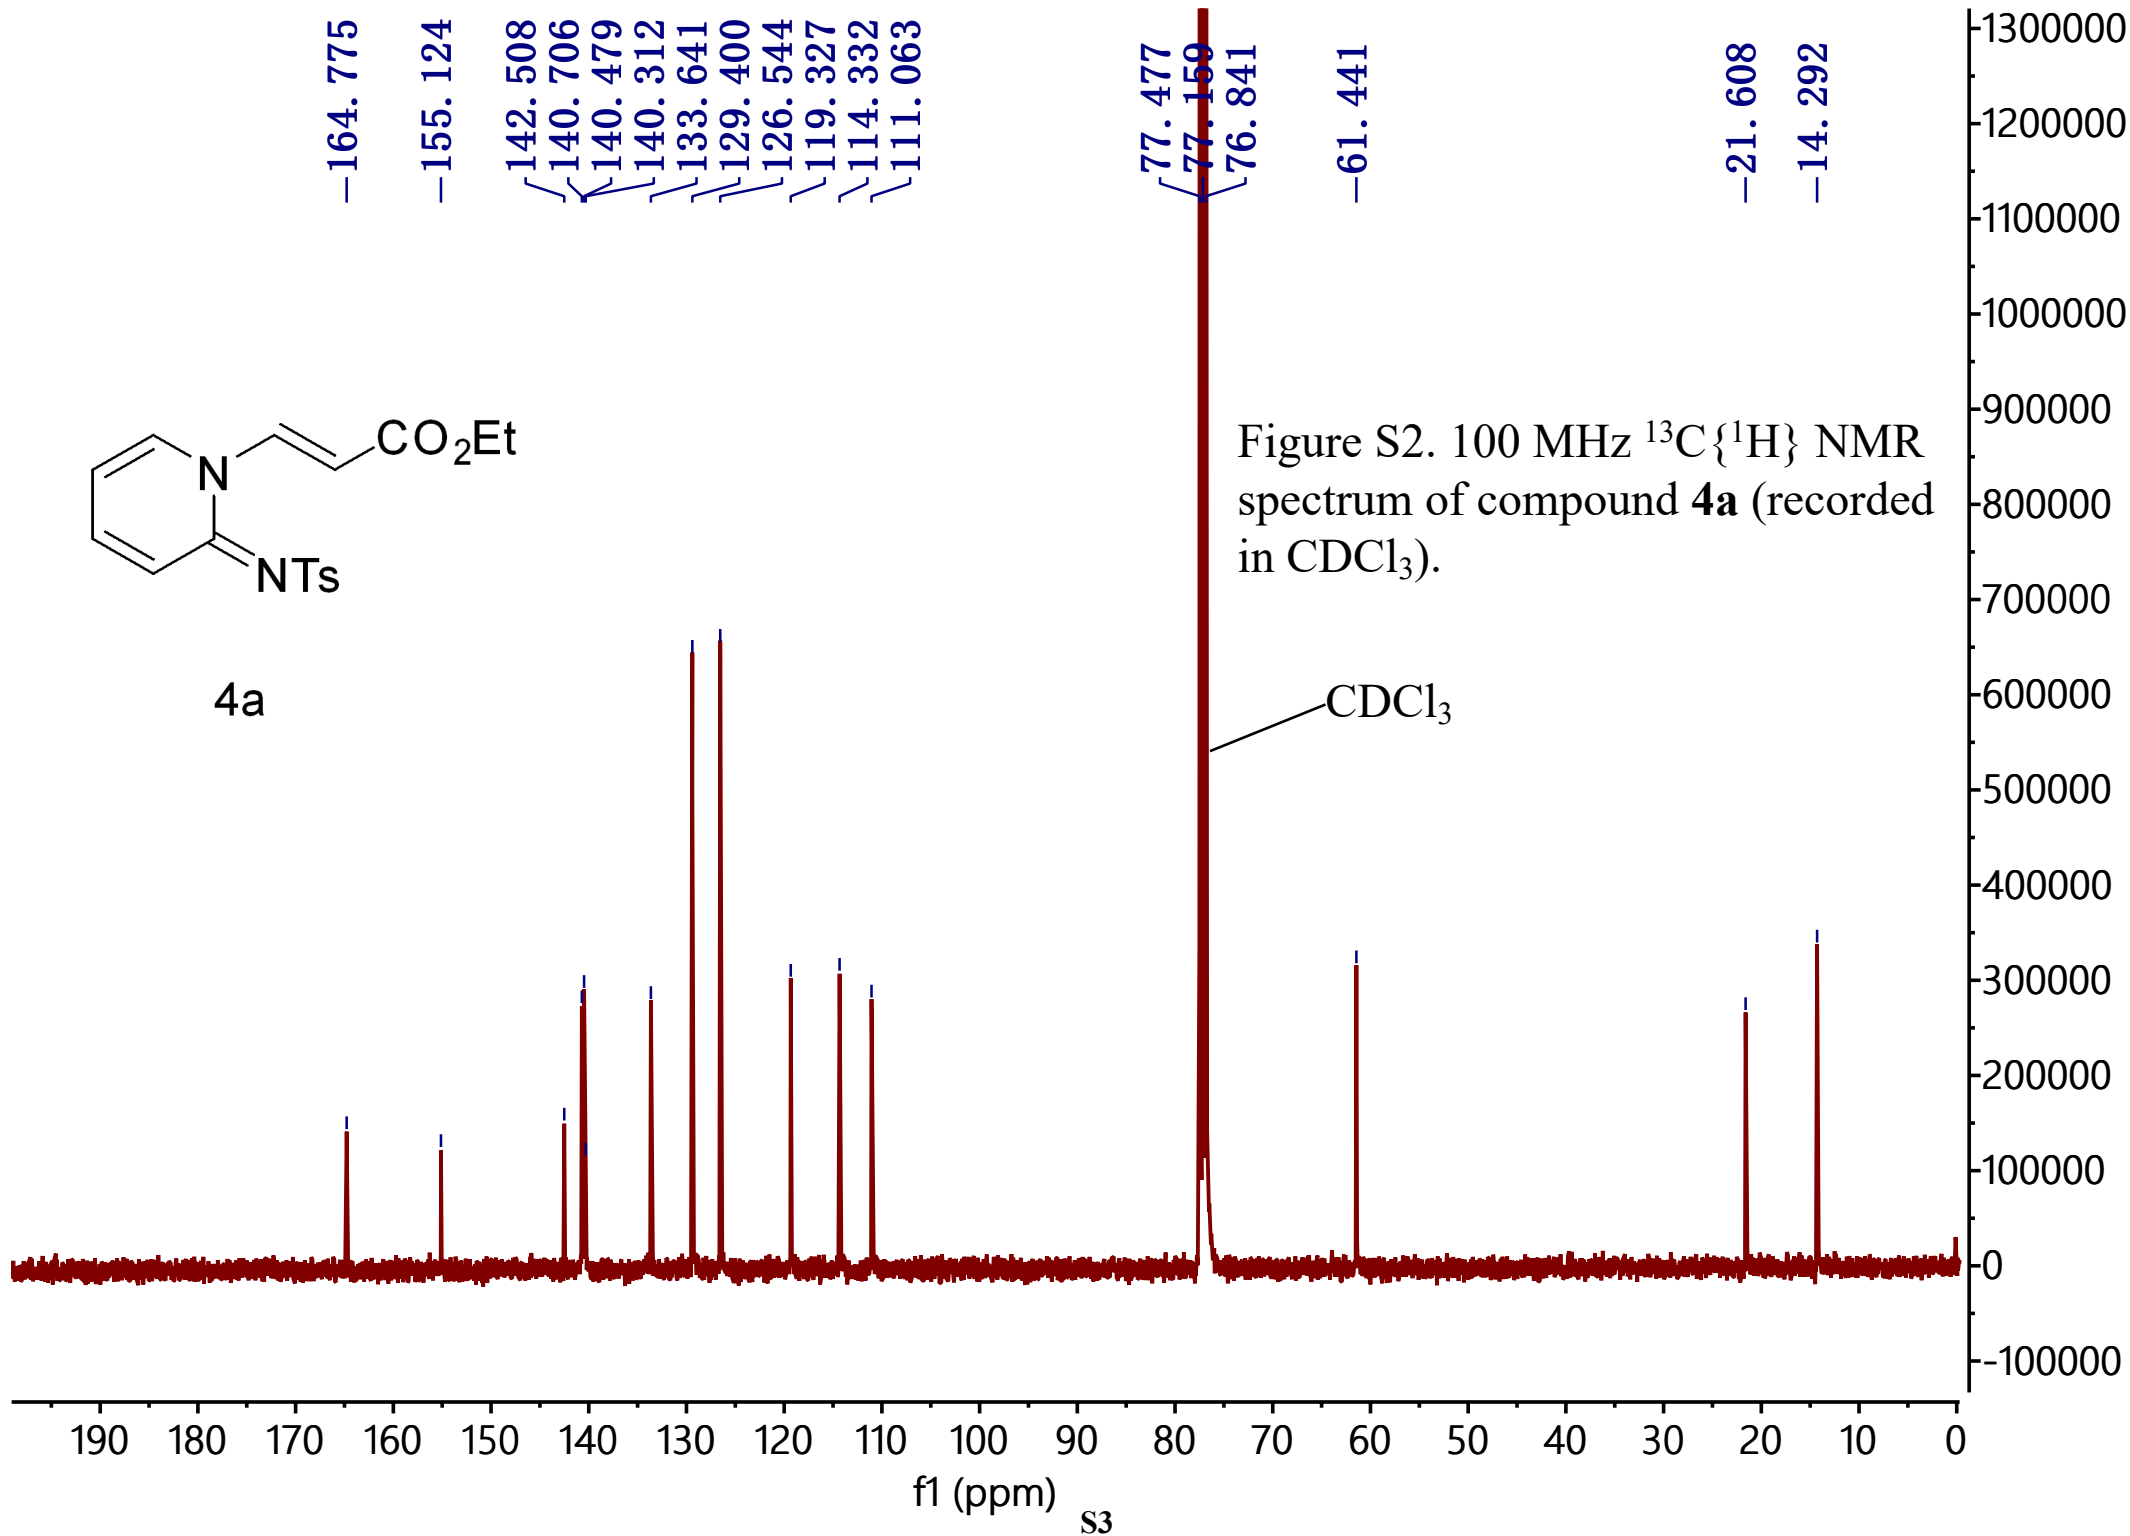

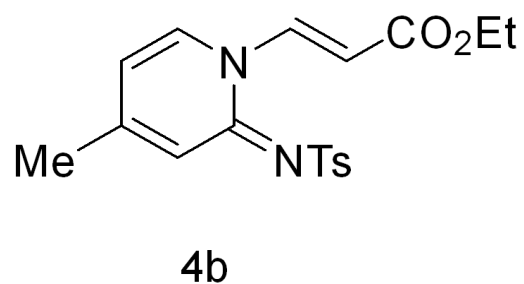

Figure S3. 400 MHz  $^1\text{H}$  NMR spectrum of compound **4b** (recorded in  $\text{CDCl}_3$ ).

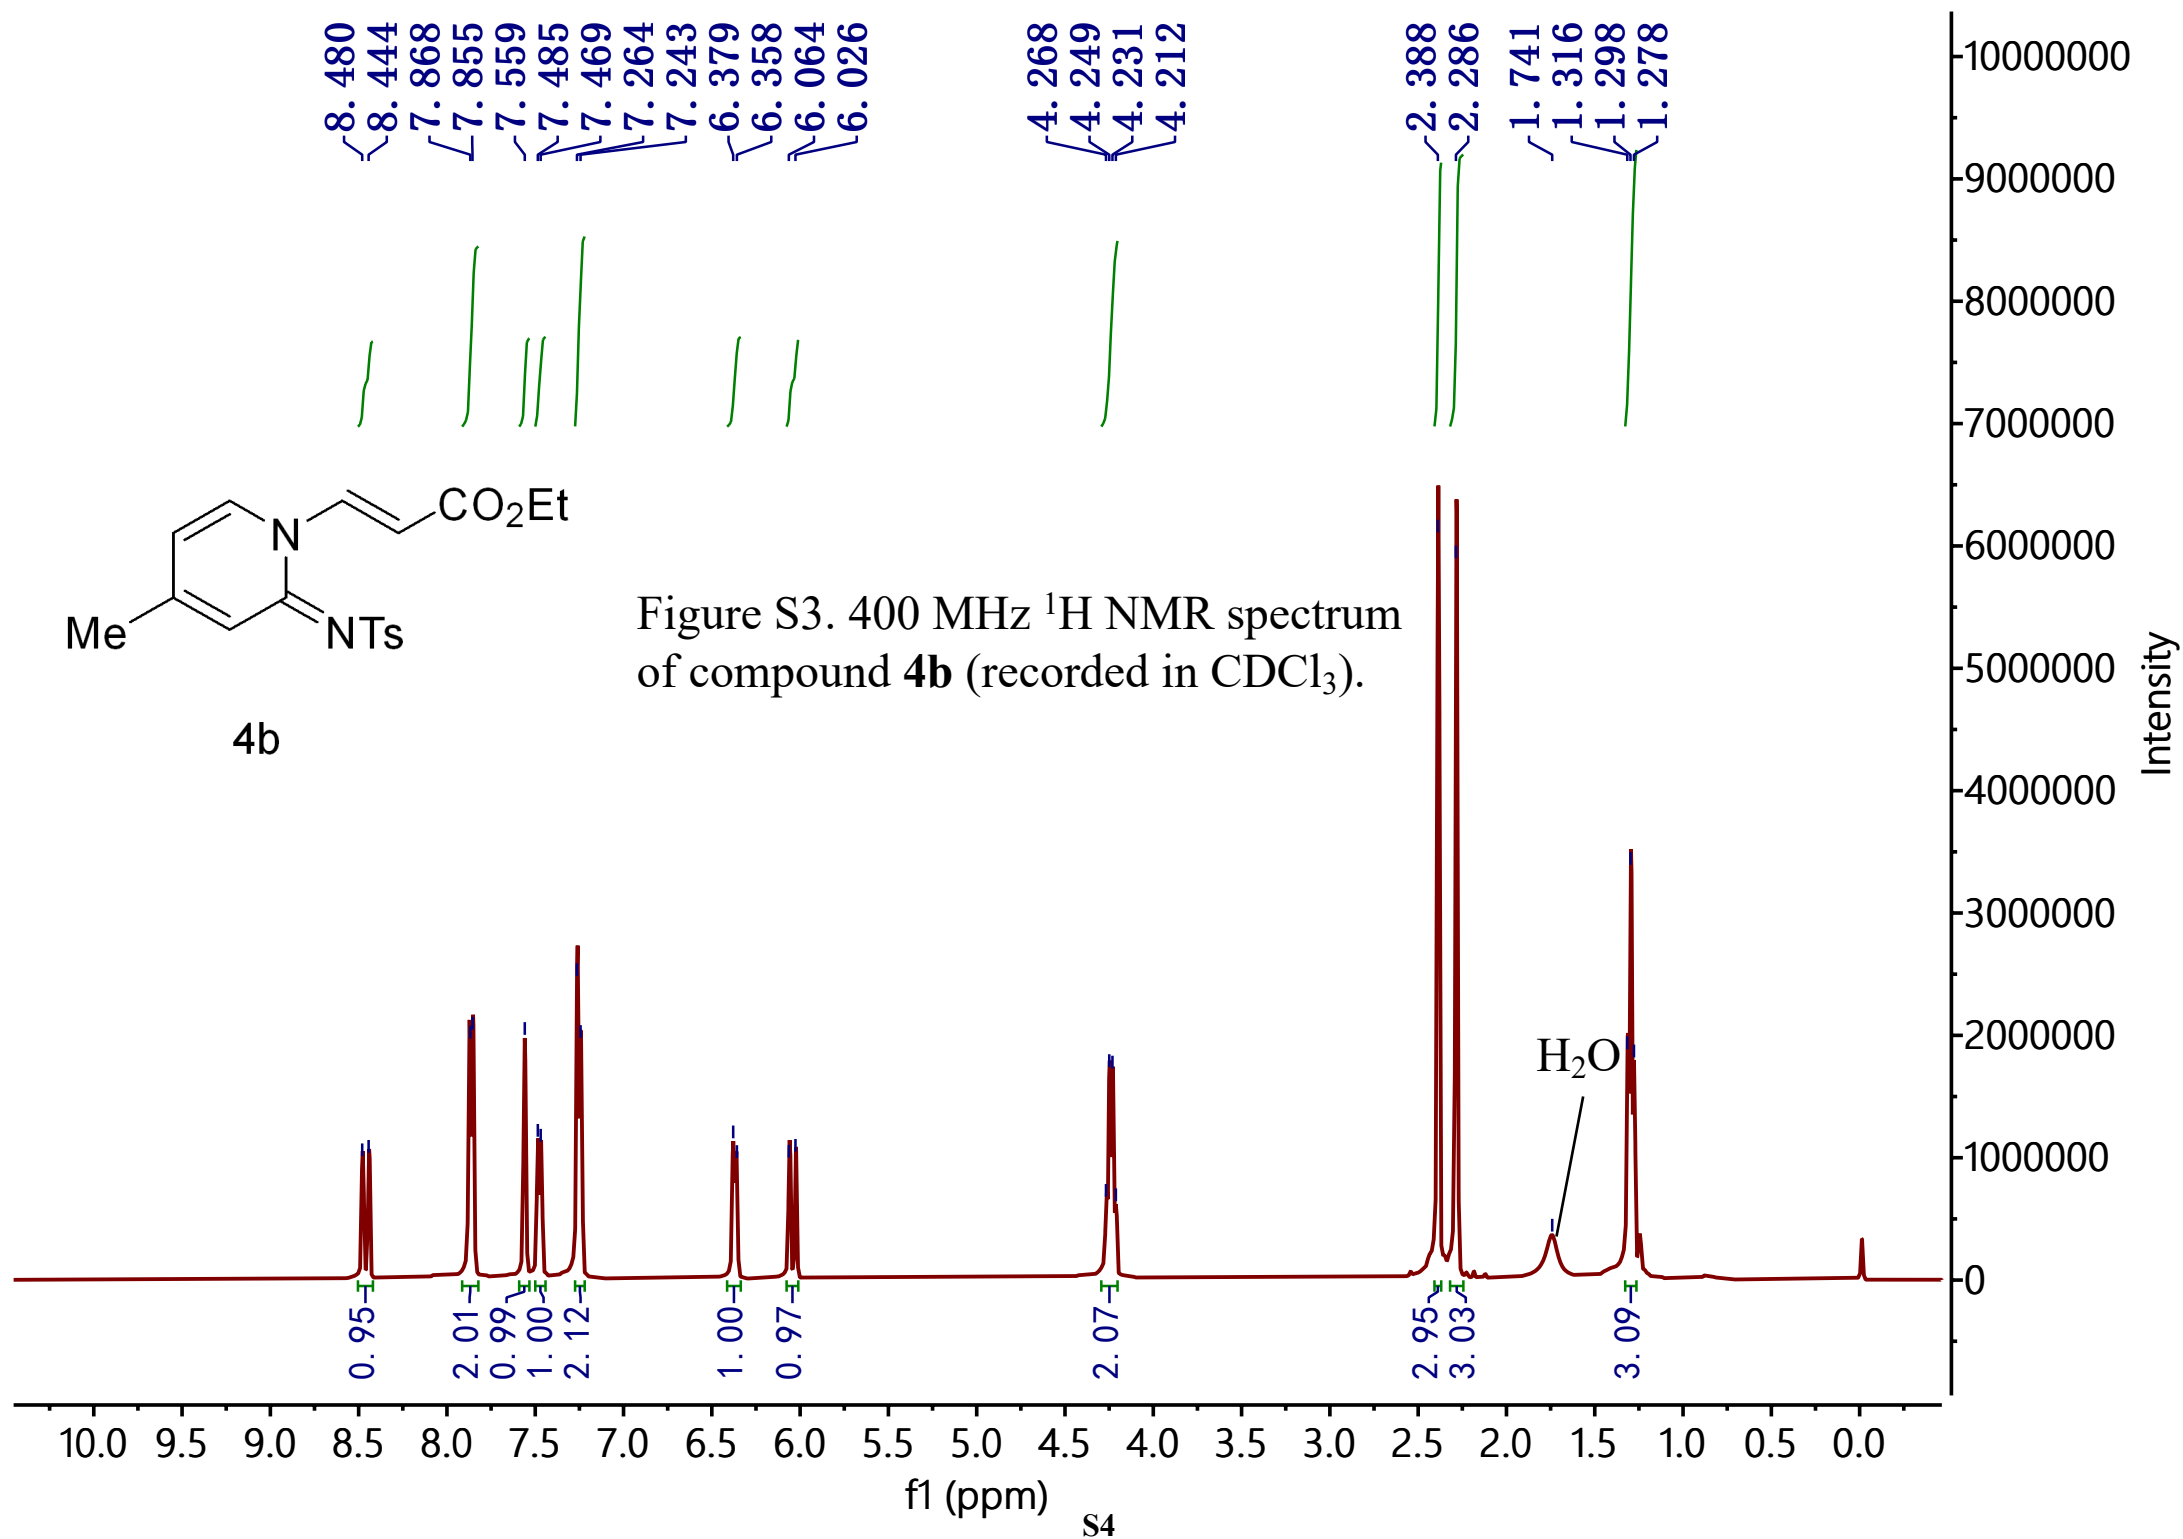

Figure S4. 100 MHz  $^{13}\text{C}\{^1\text{H}\}$  NMR spectrum of compound **4b** (recorded in  $\text{CDCl}_3$ ).

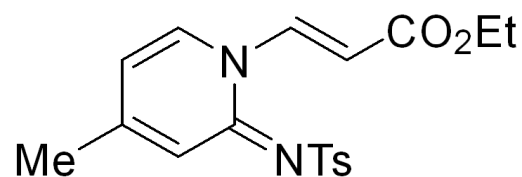

**4b**

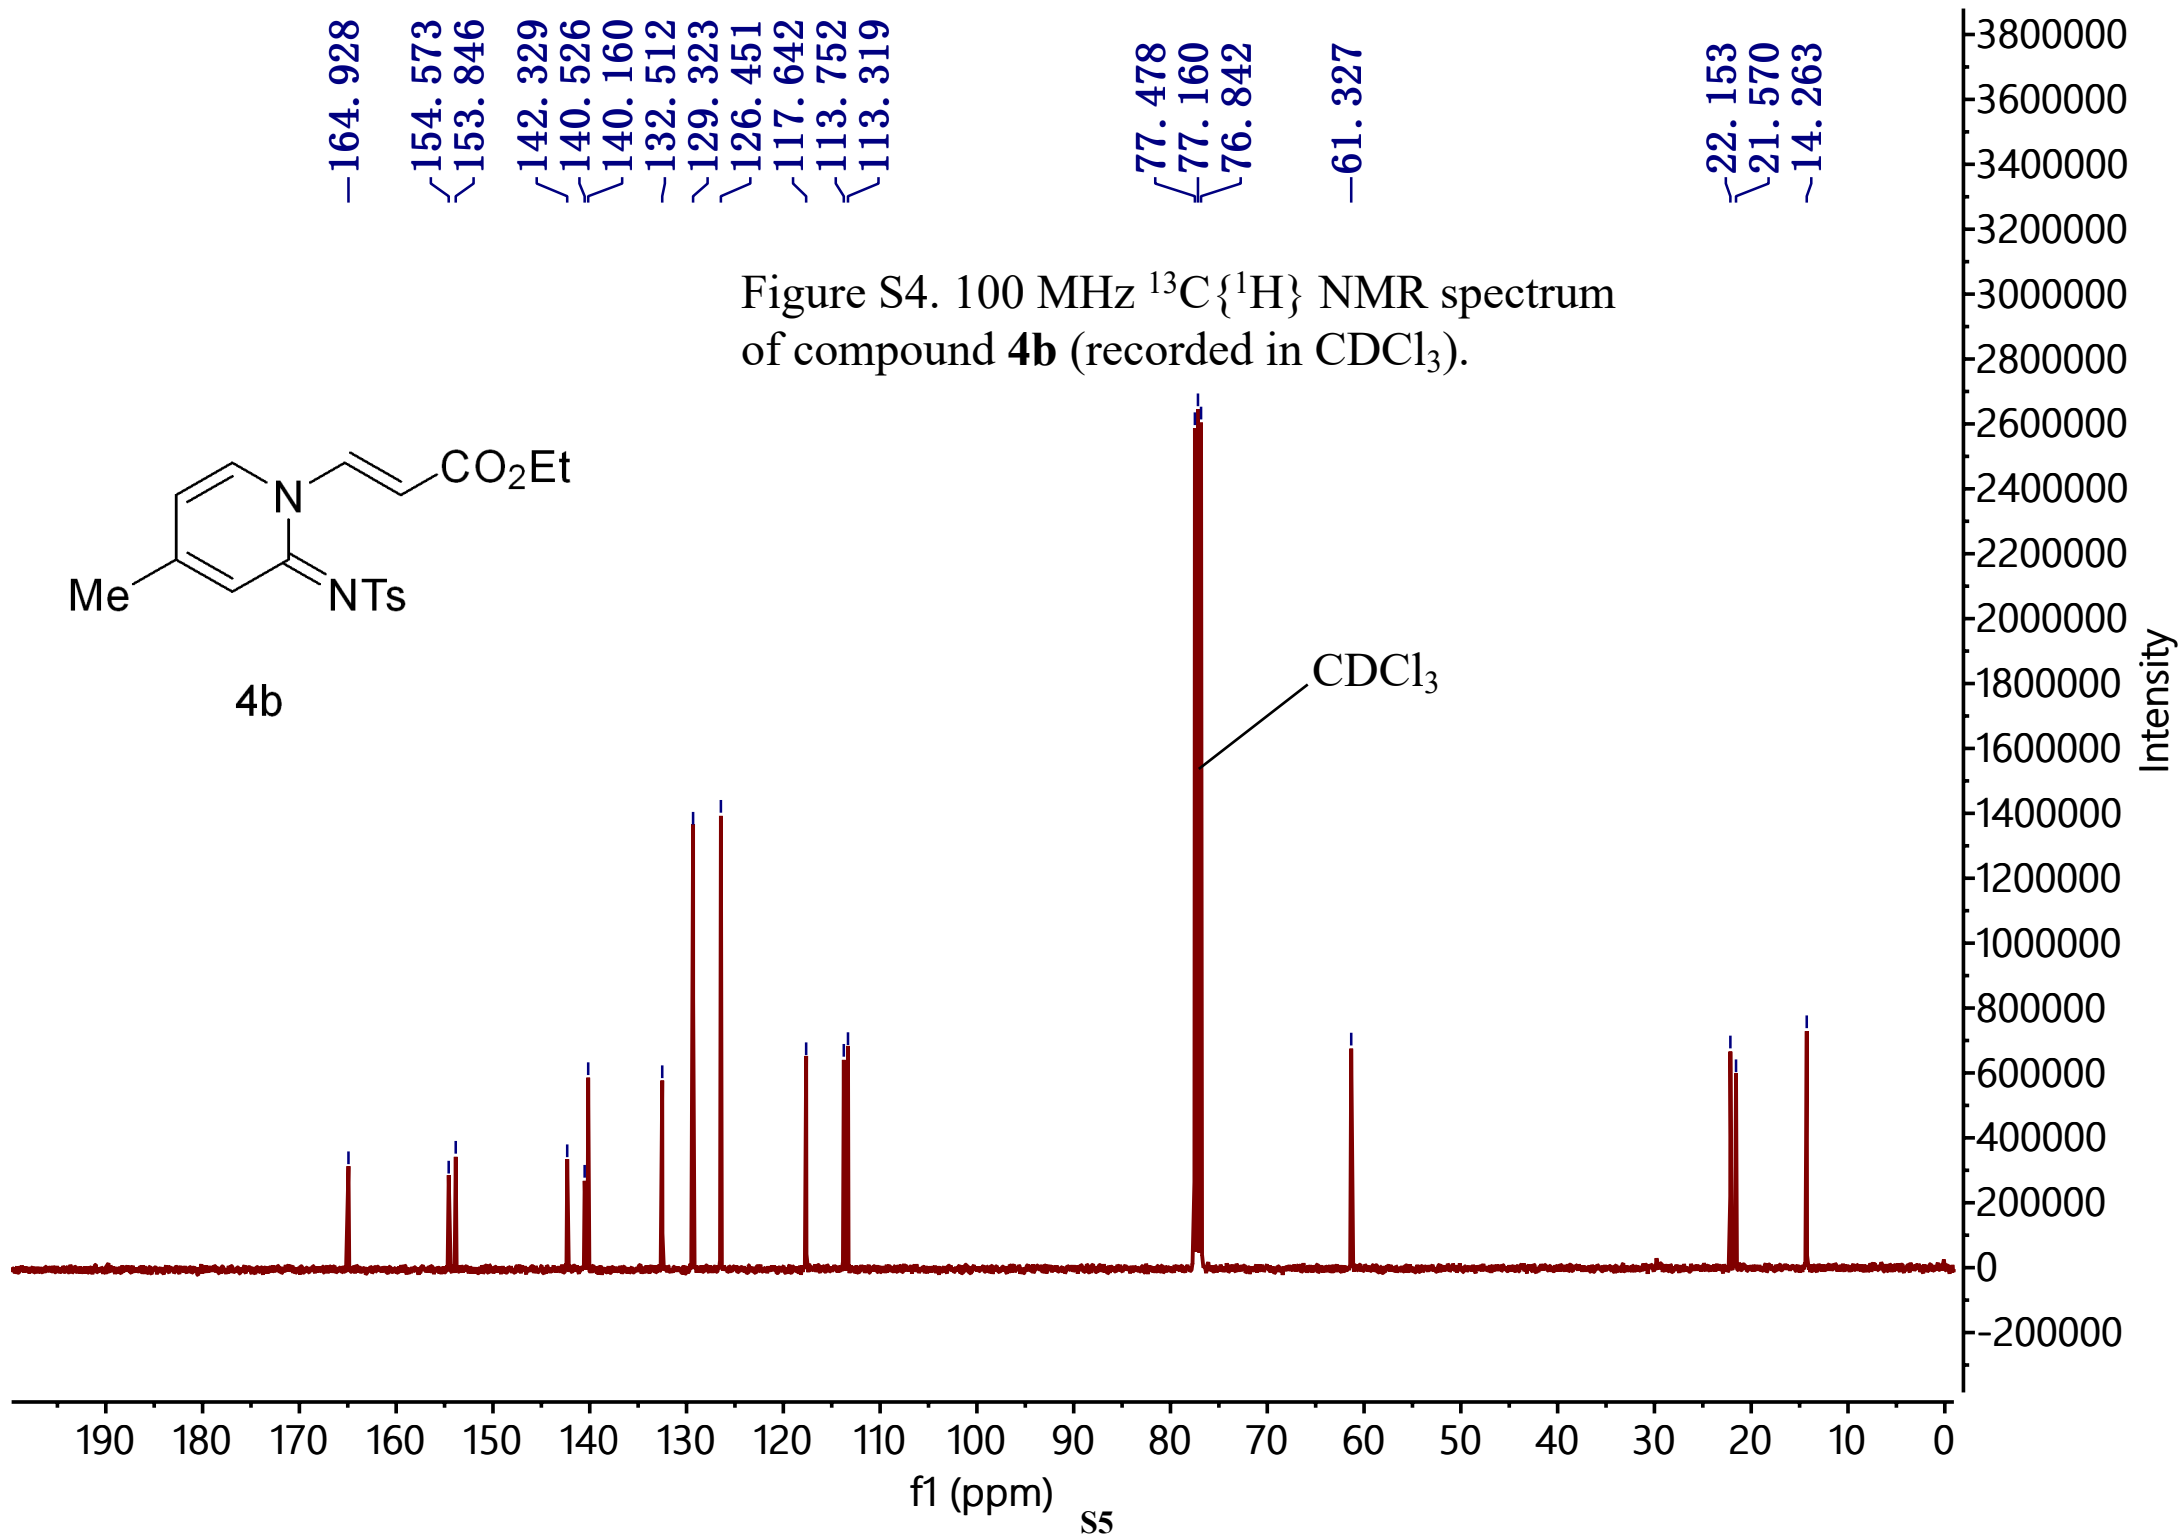

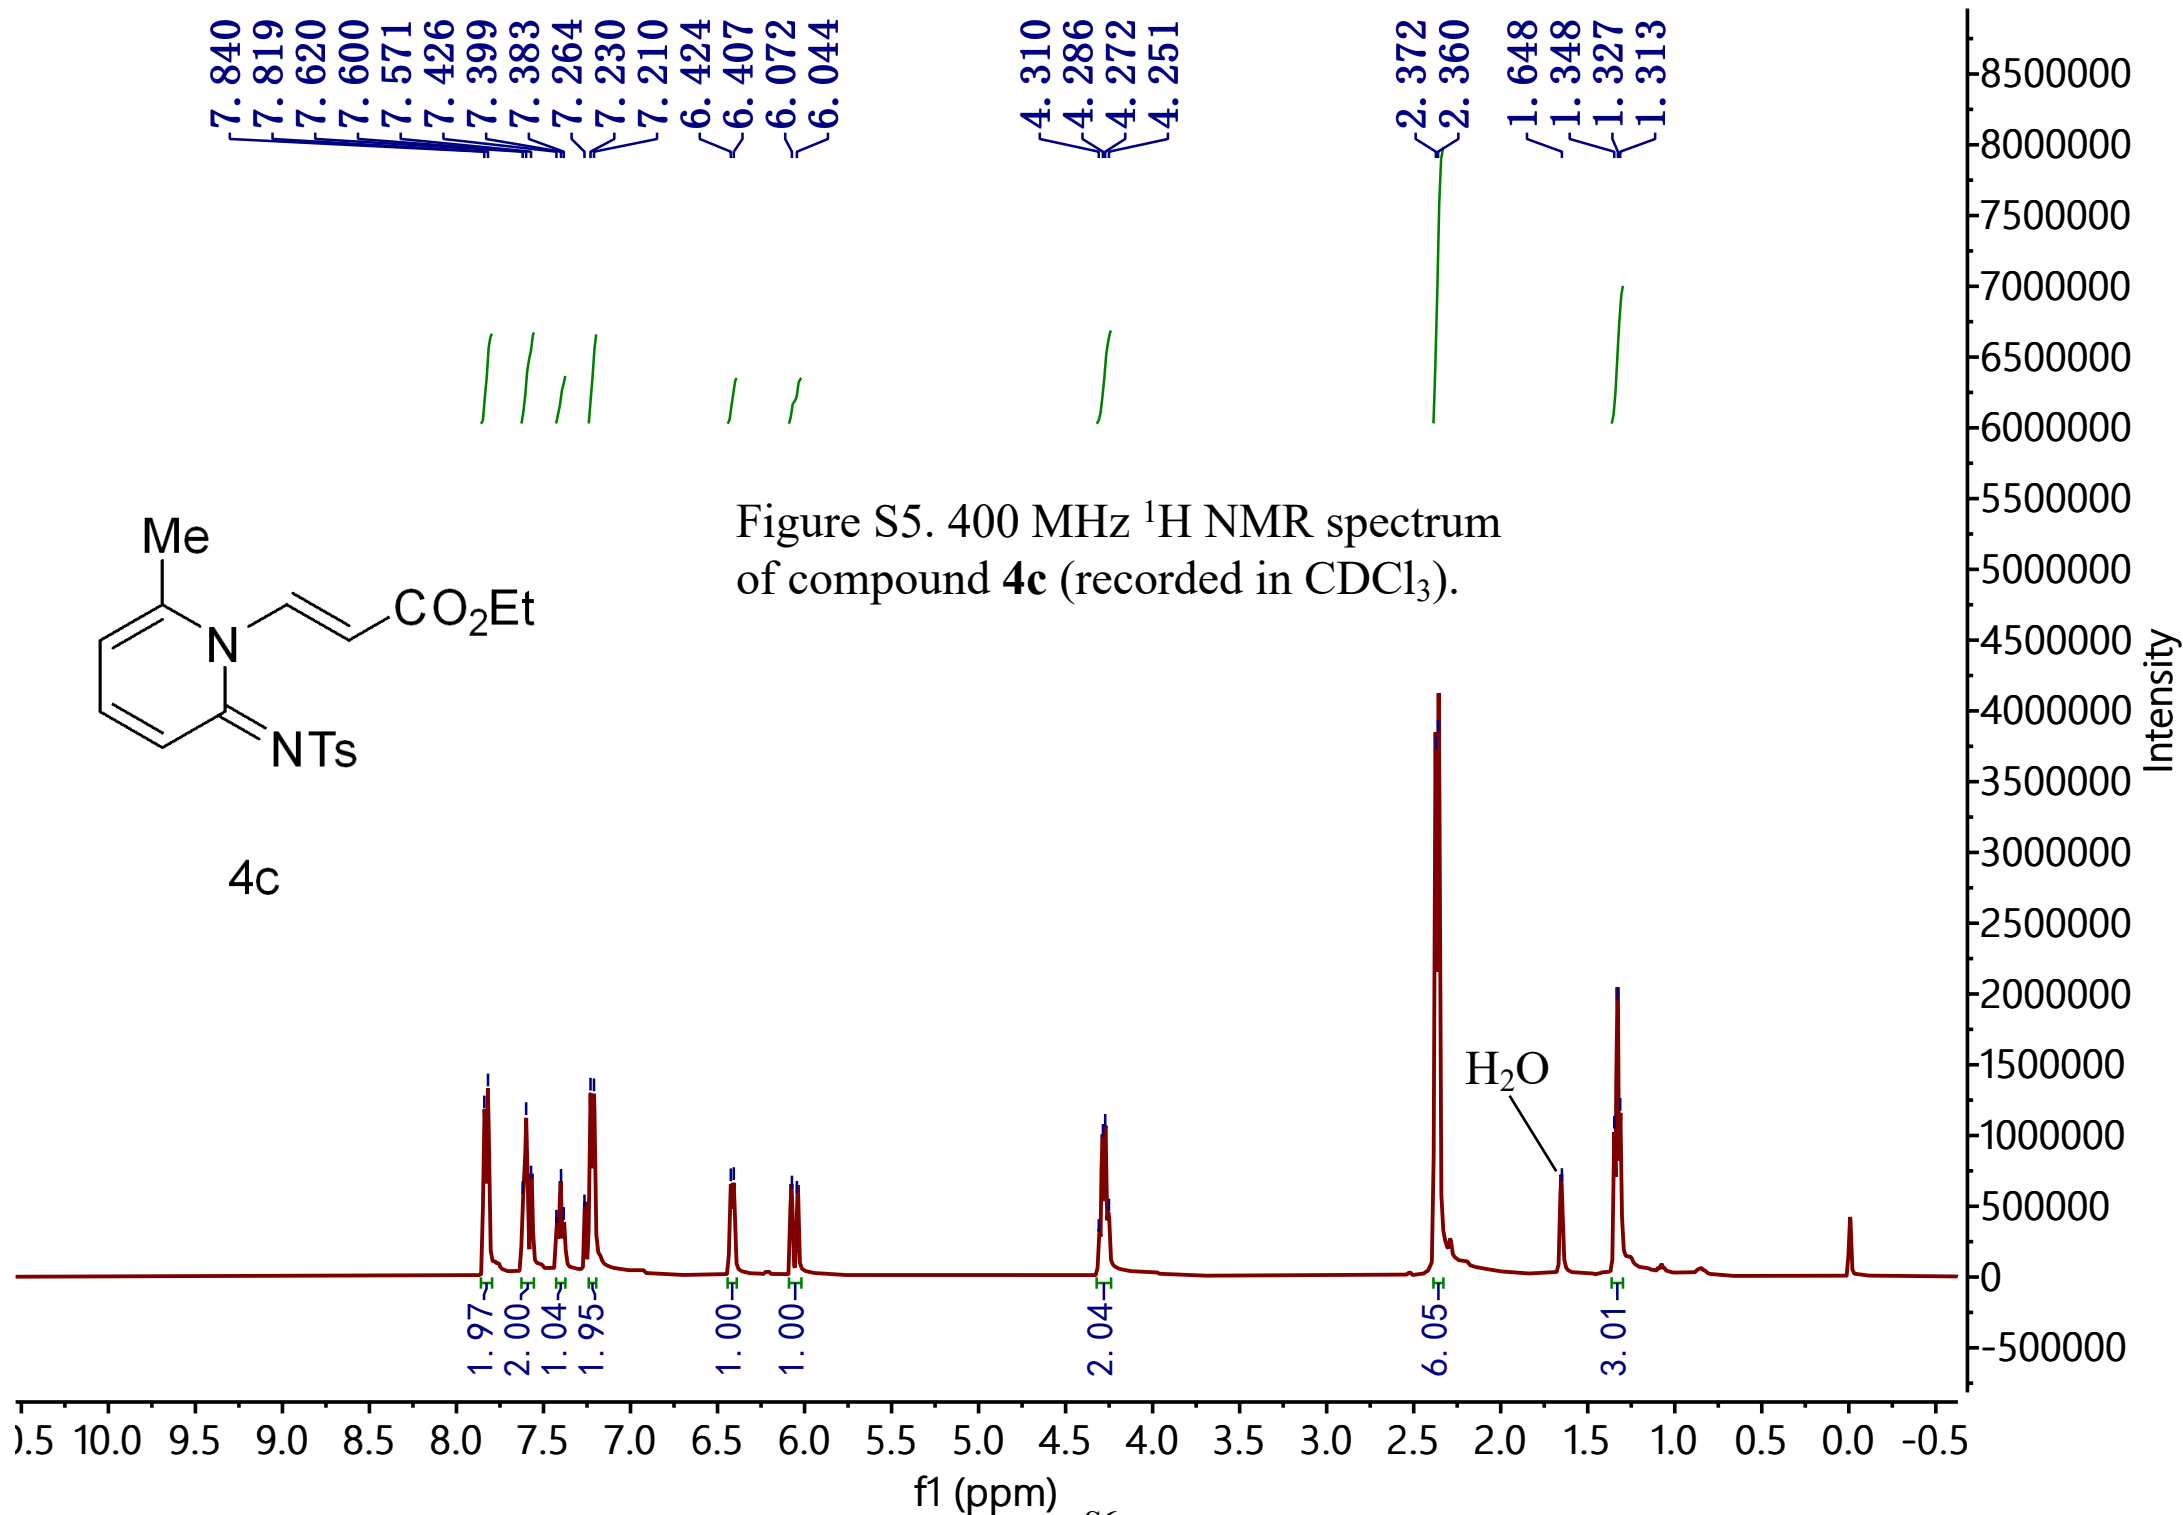

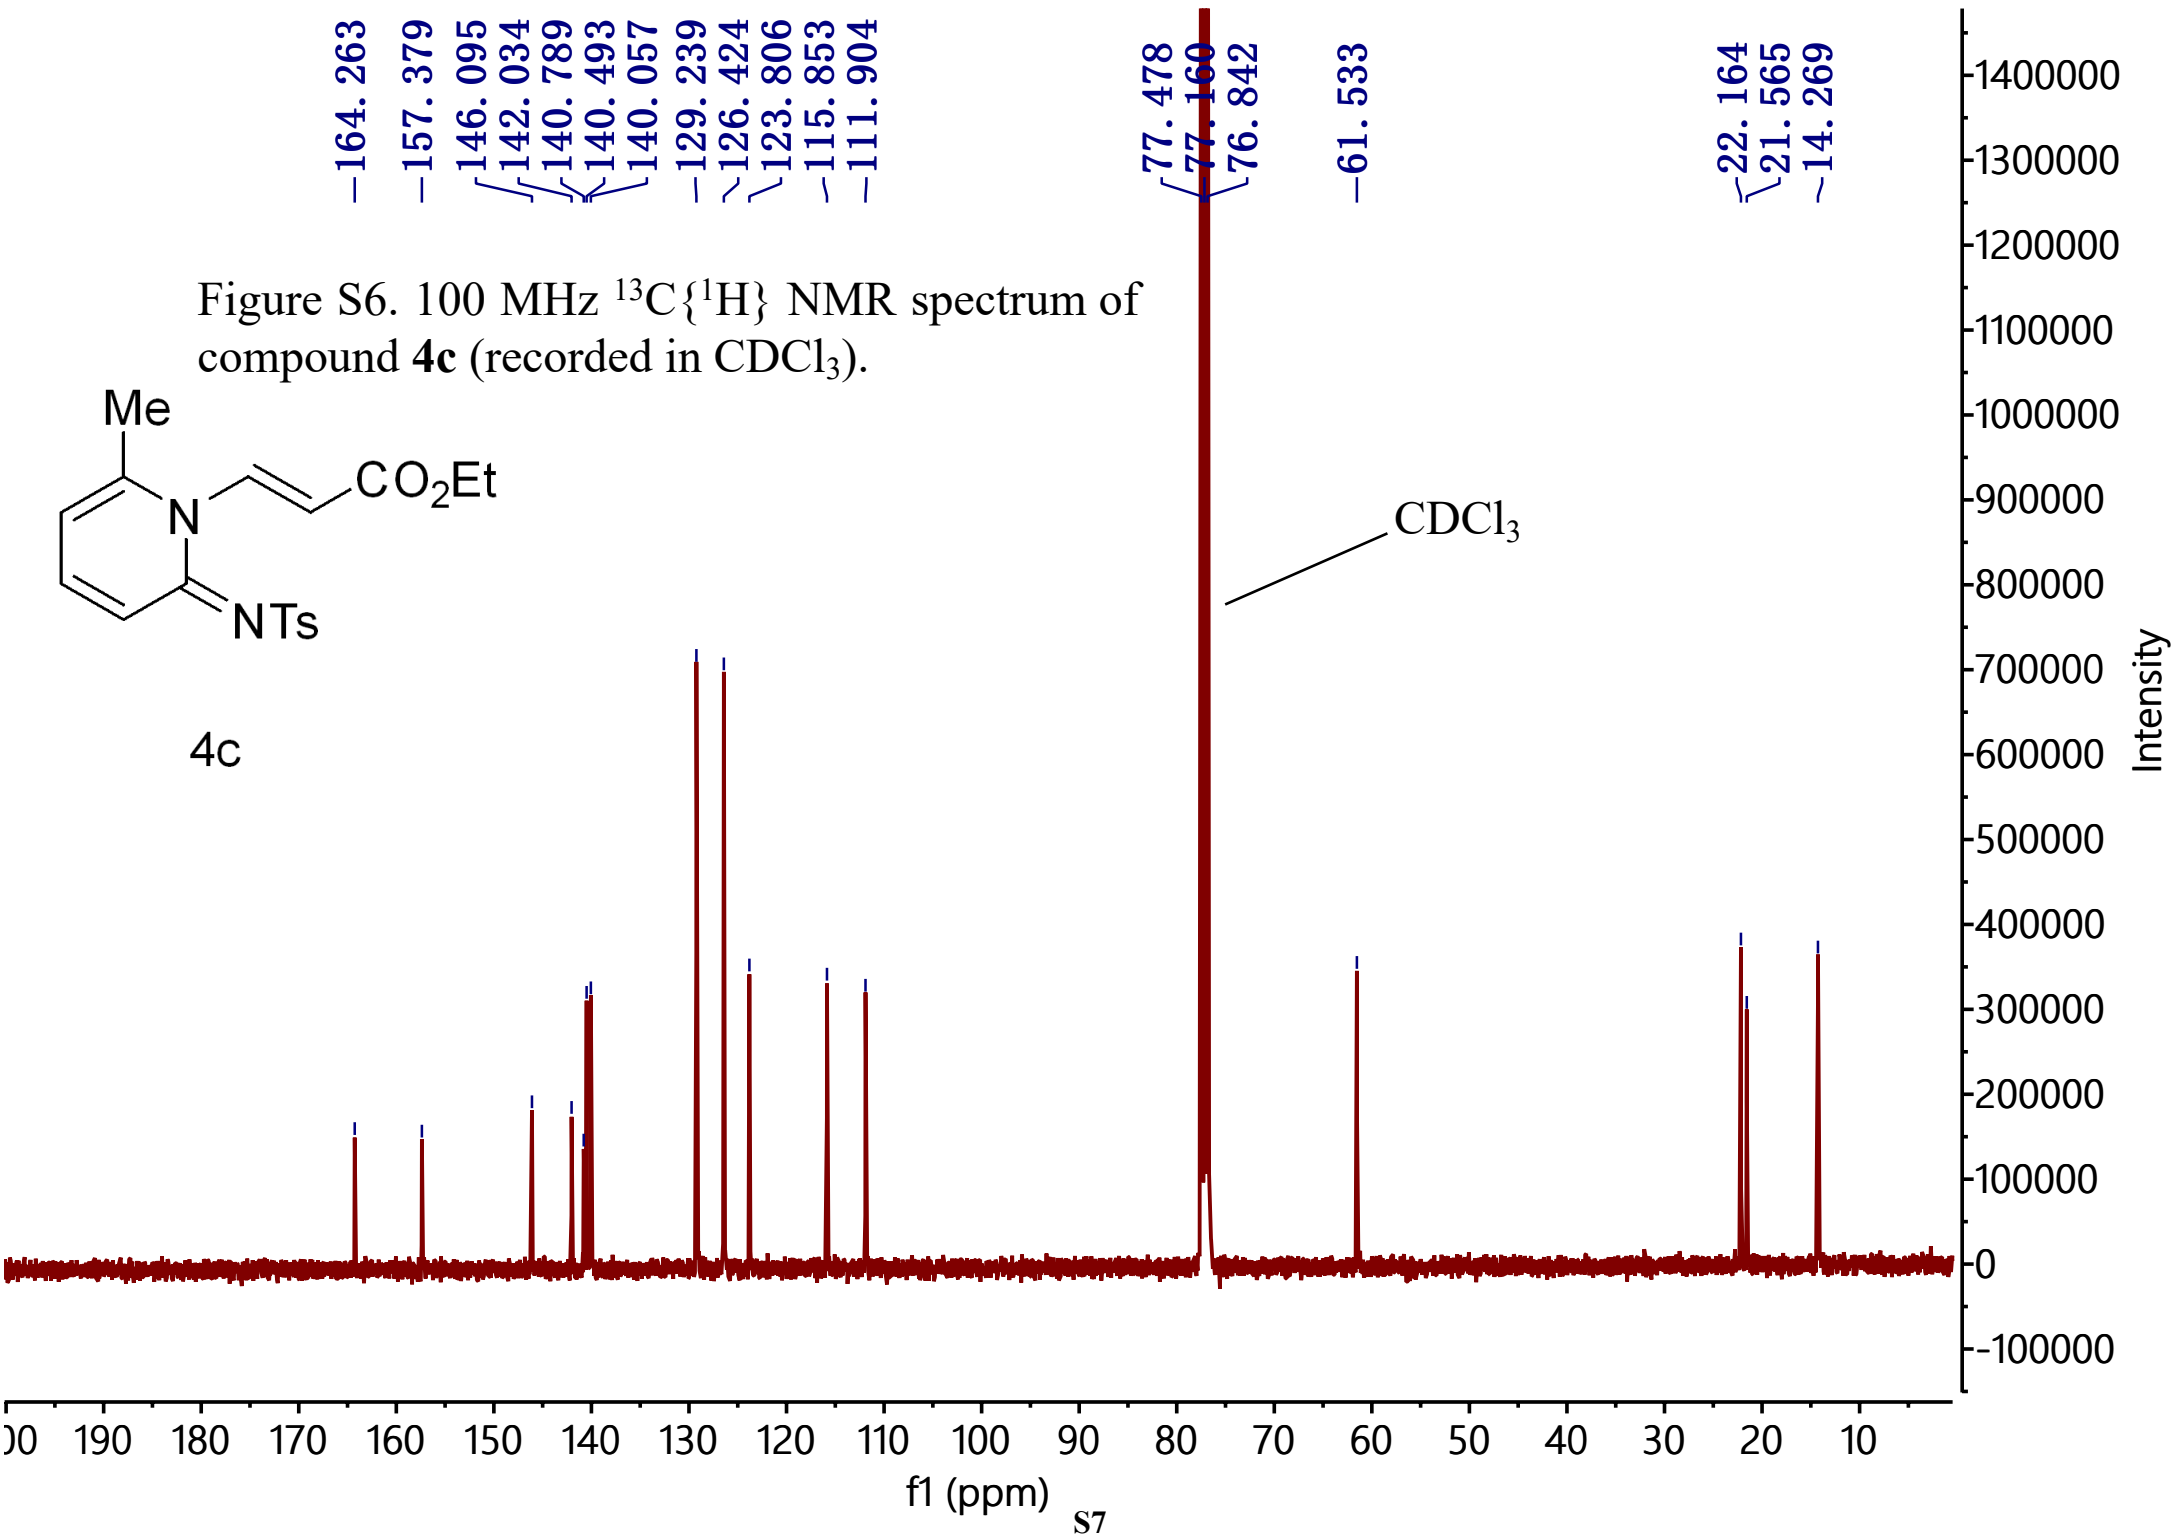

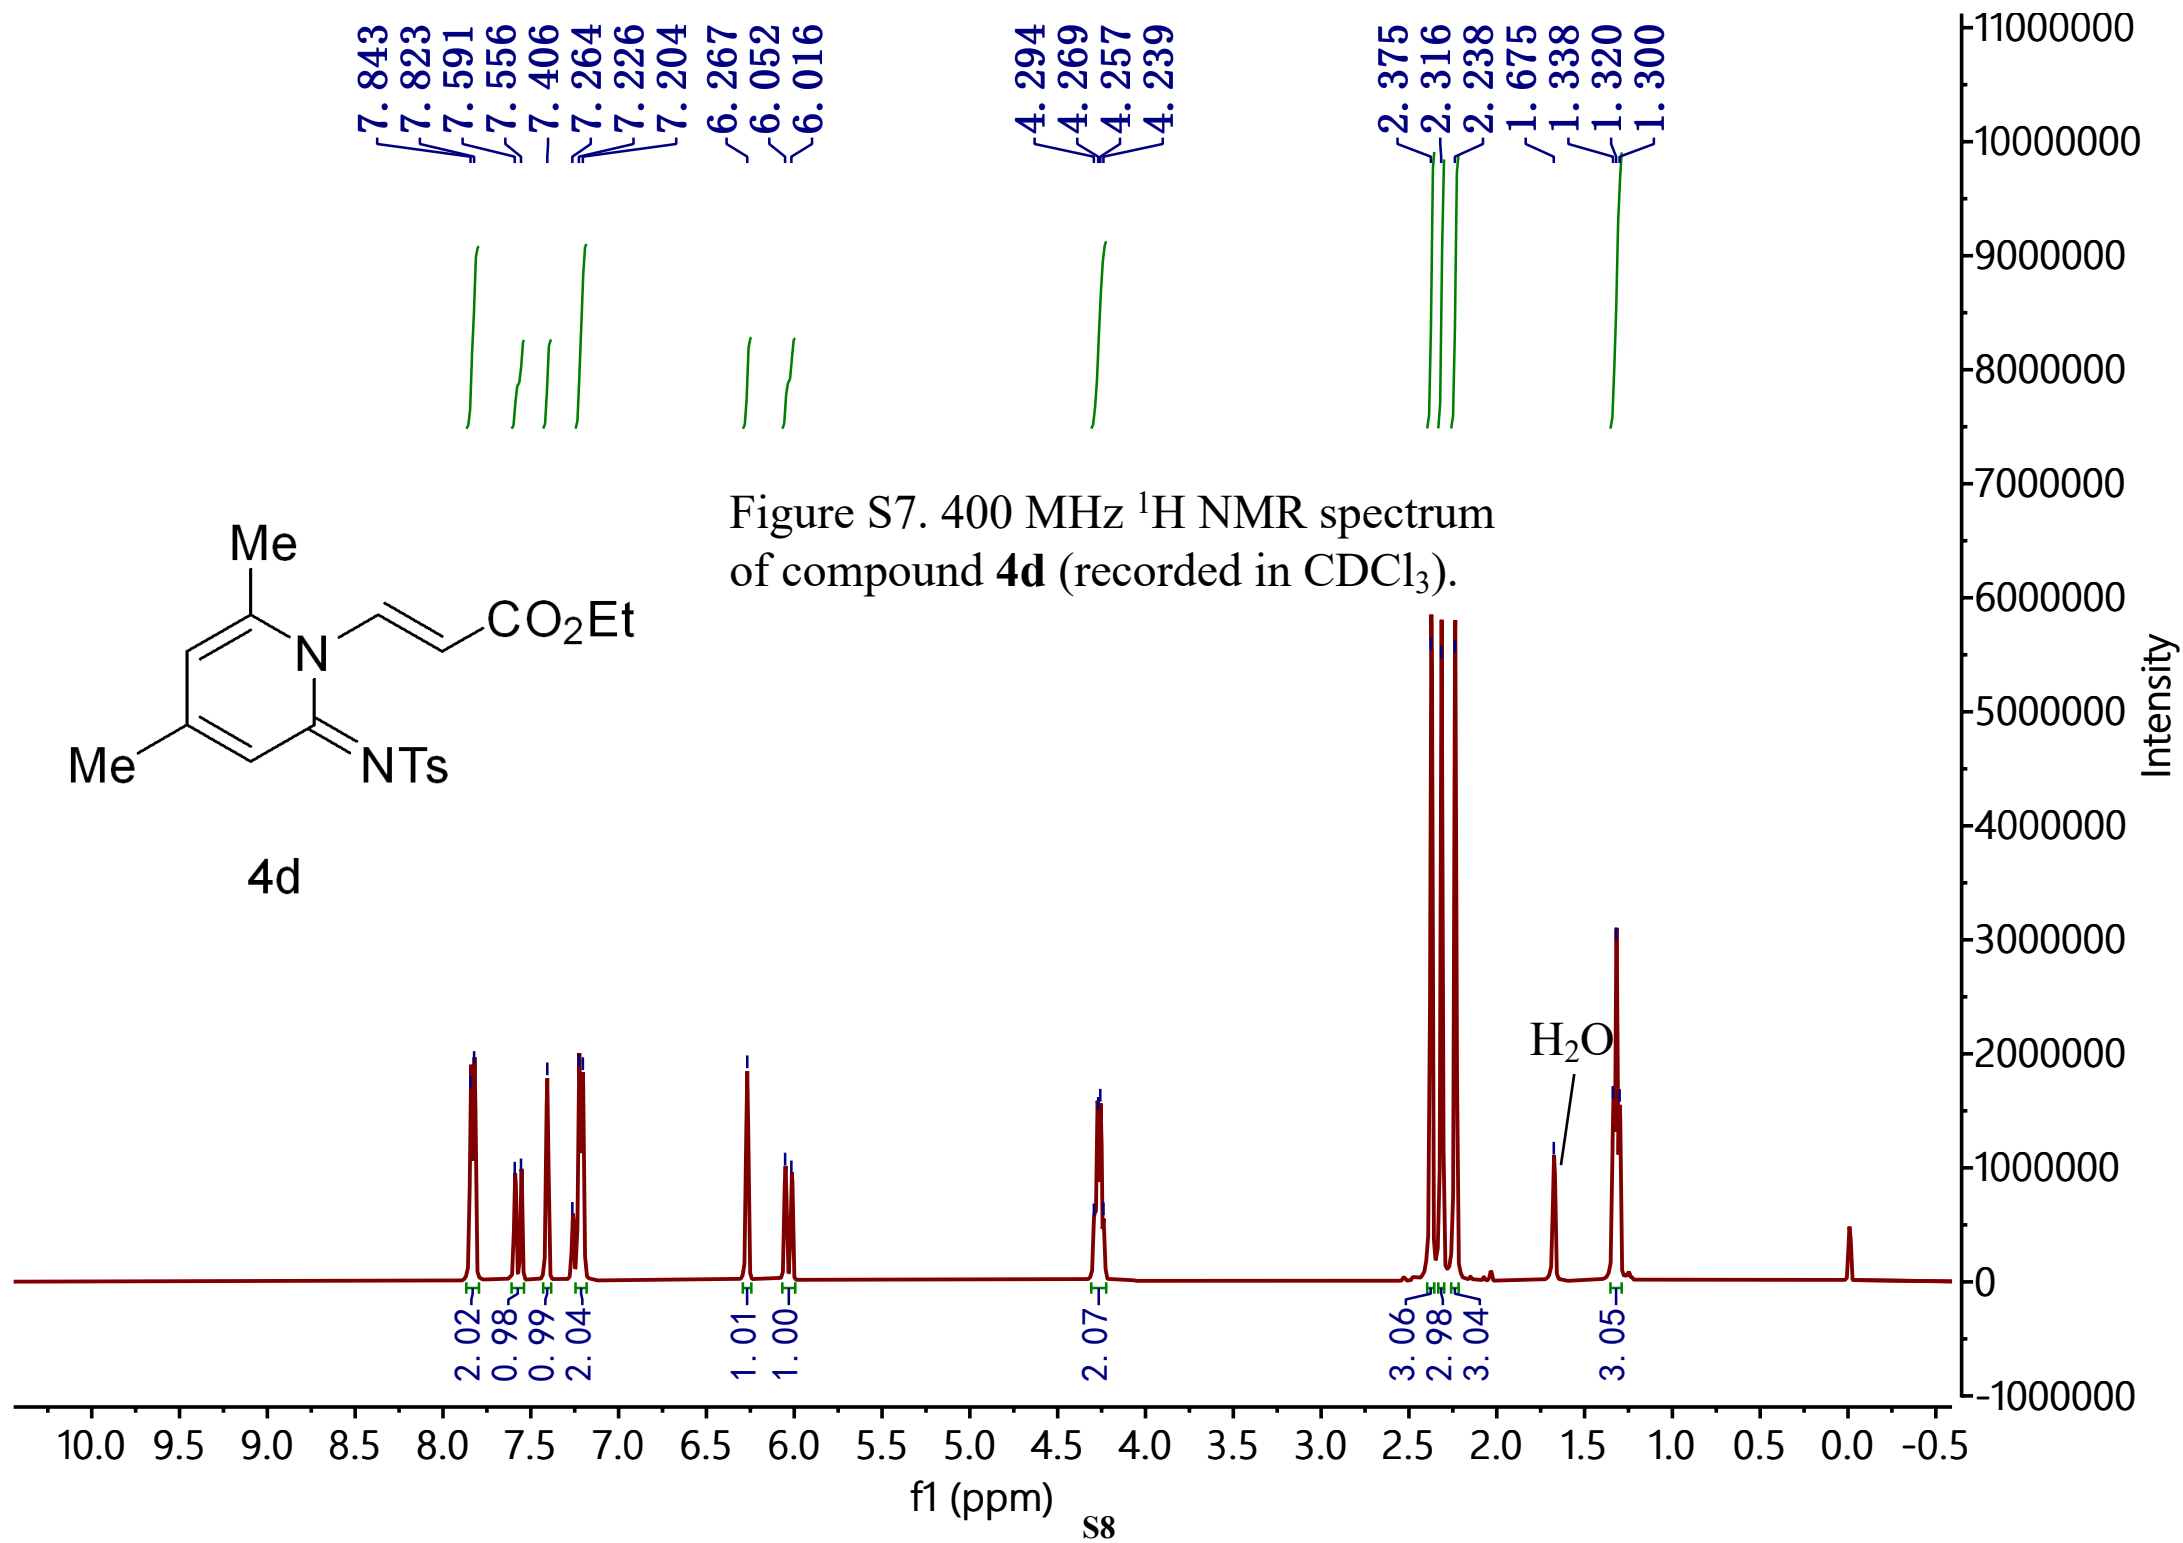



$\sim 164.386$   
 $\sim 156.825$   
 $\sim 153.179$   
 $\sim 144.804$   
 $\sim 141.866$   
 $\sim 141.014$   
 $\sim 139.996$   
  
 $\sim 129.170$   
 $\sim 126.359$   
 $\sim 123.433$   
 $\sim 114.748$   
 $\sim 114.486$   
  
 $\sim 77.479$   
 $\sim 77.161$   
 $\sim 76.843$   
  
 $-61.445$   
  
 $\sim 21.952$   
 $\sim 21.927$   
 $\sim 21.550$   
 $\sim 14.260$

Figure S8. 100 MHz  $^{13}\text{C}\{^1\text{H}\}$  NMR spectrum of compound **4d** (recorded in  $\text{CDCl}_3$ ).

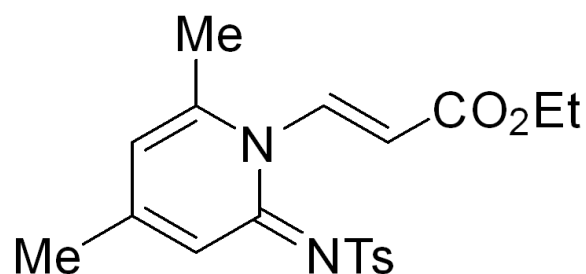

**4d**

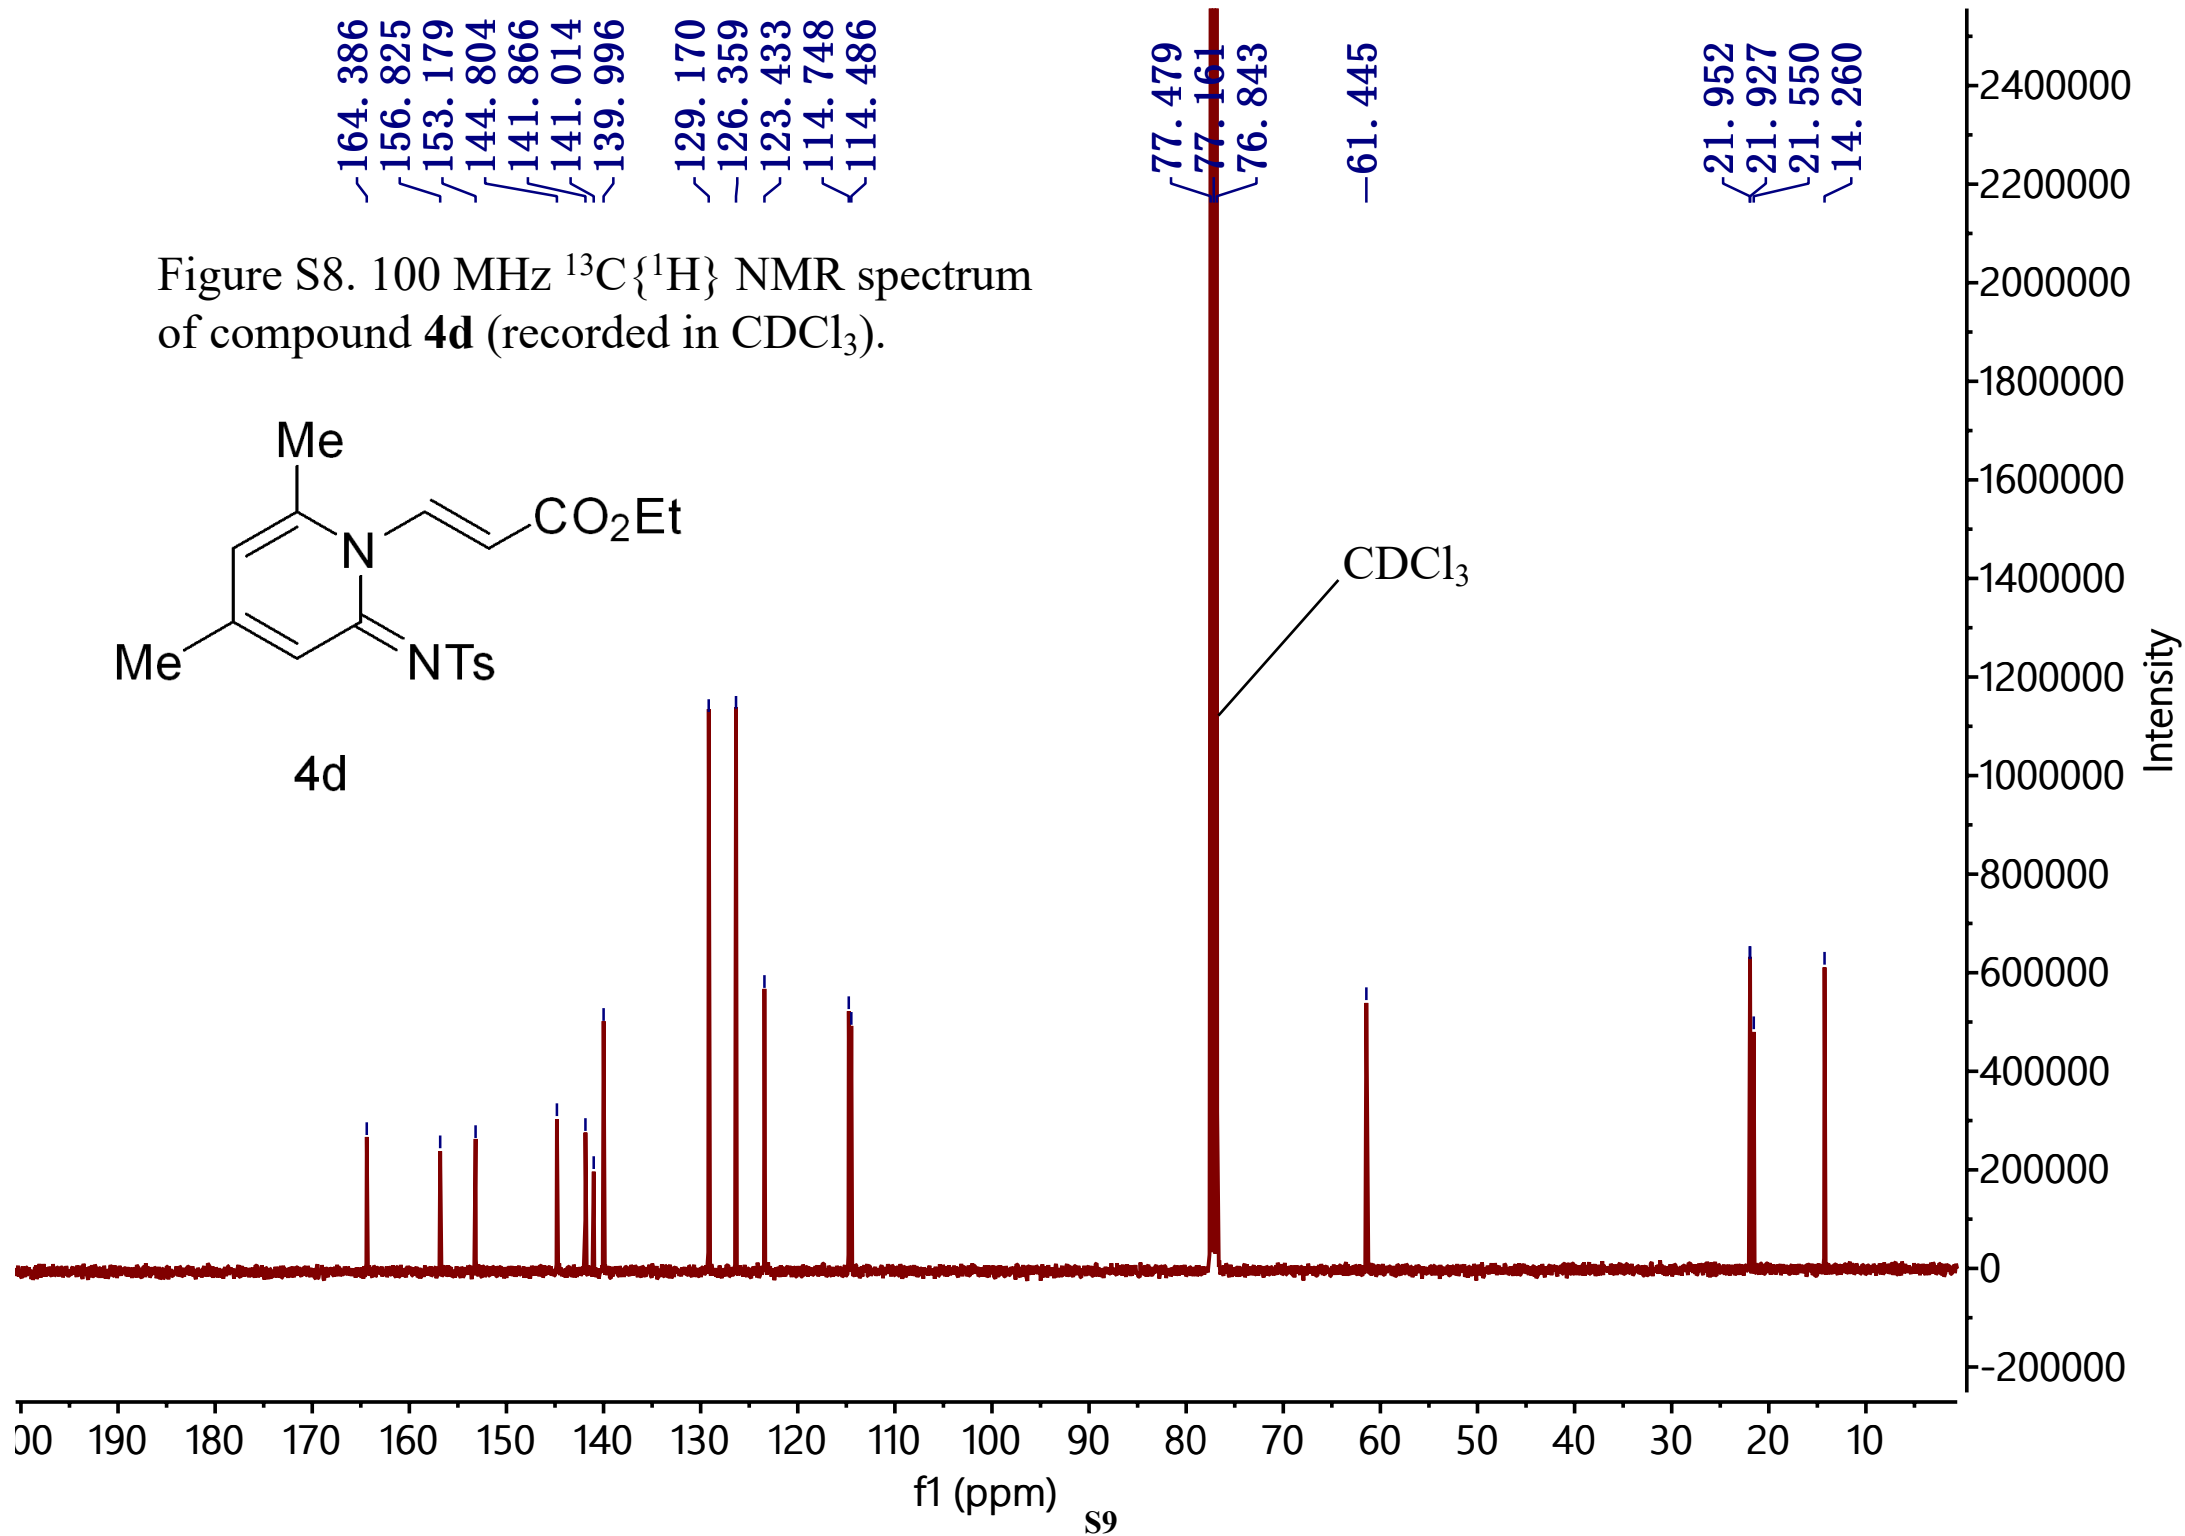

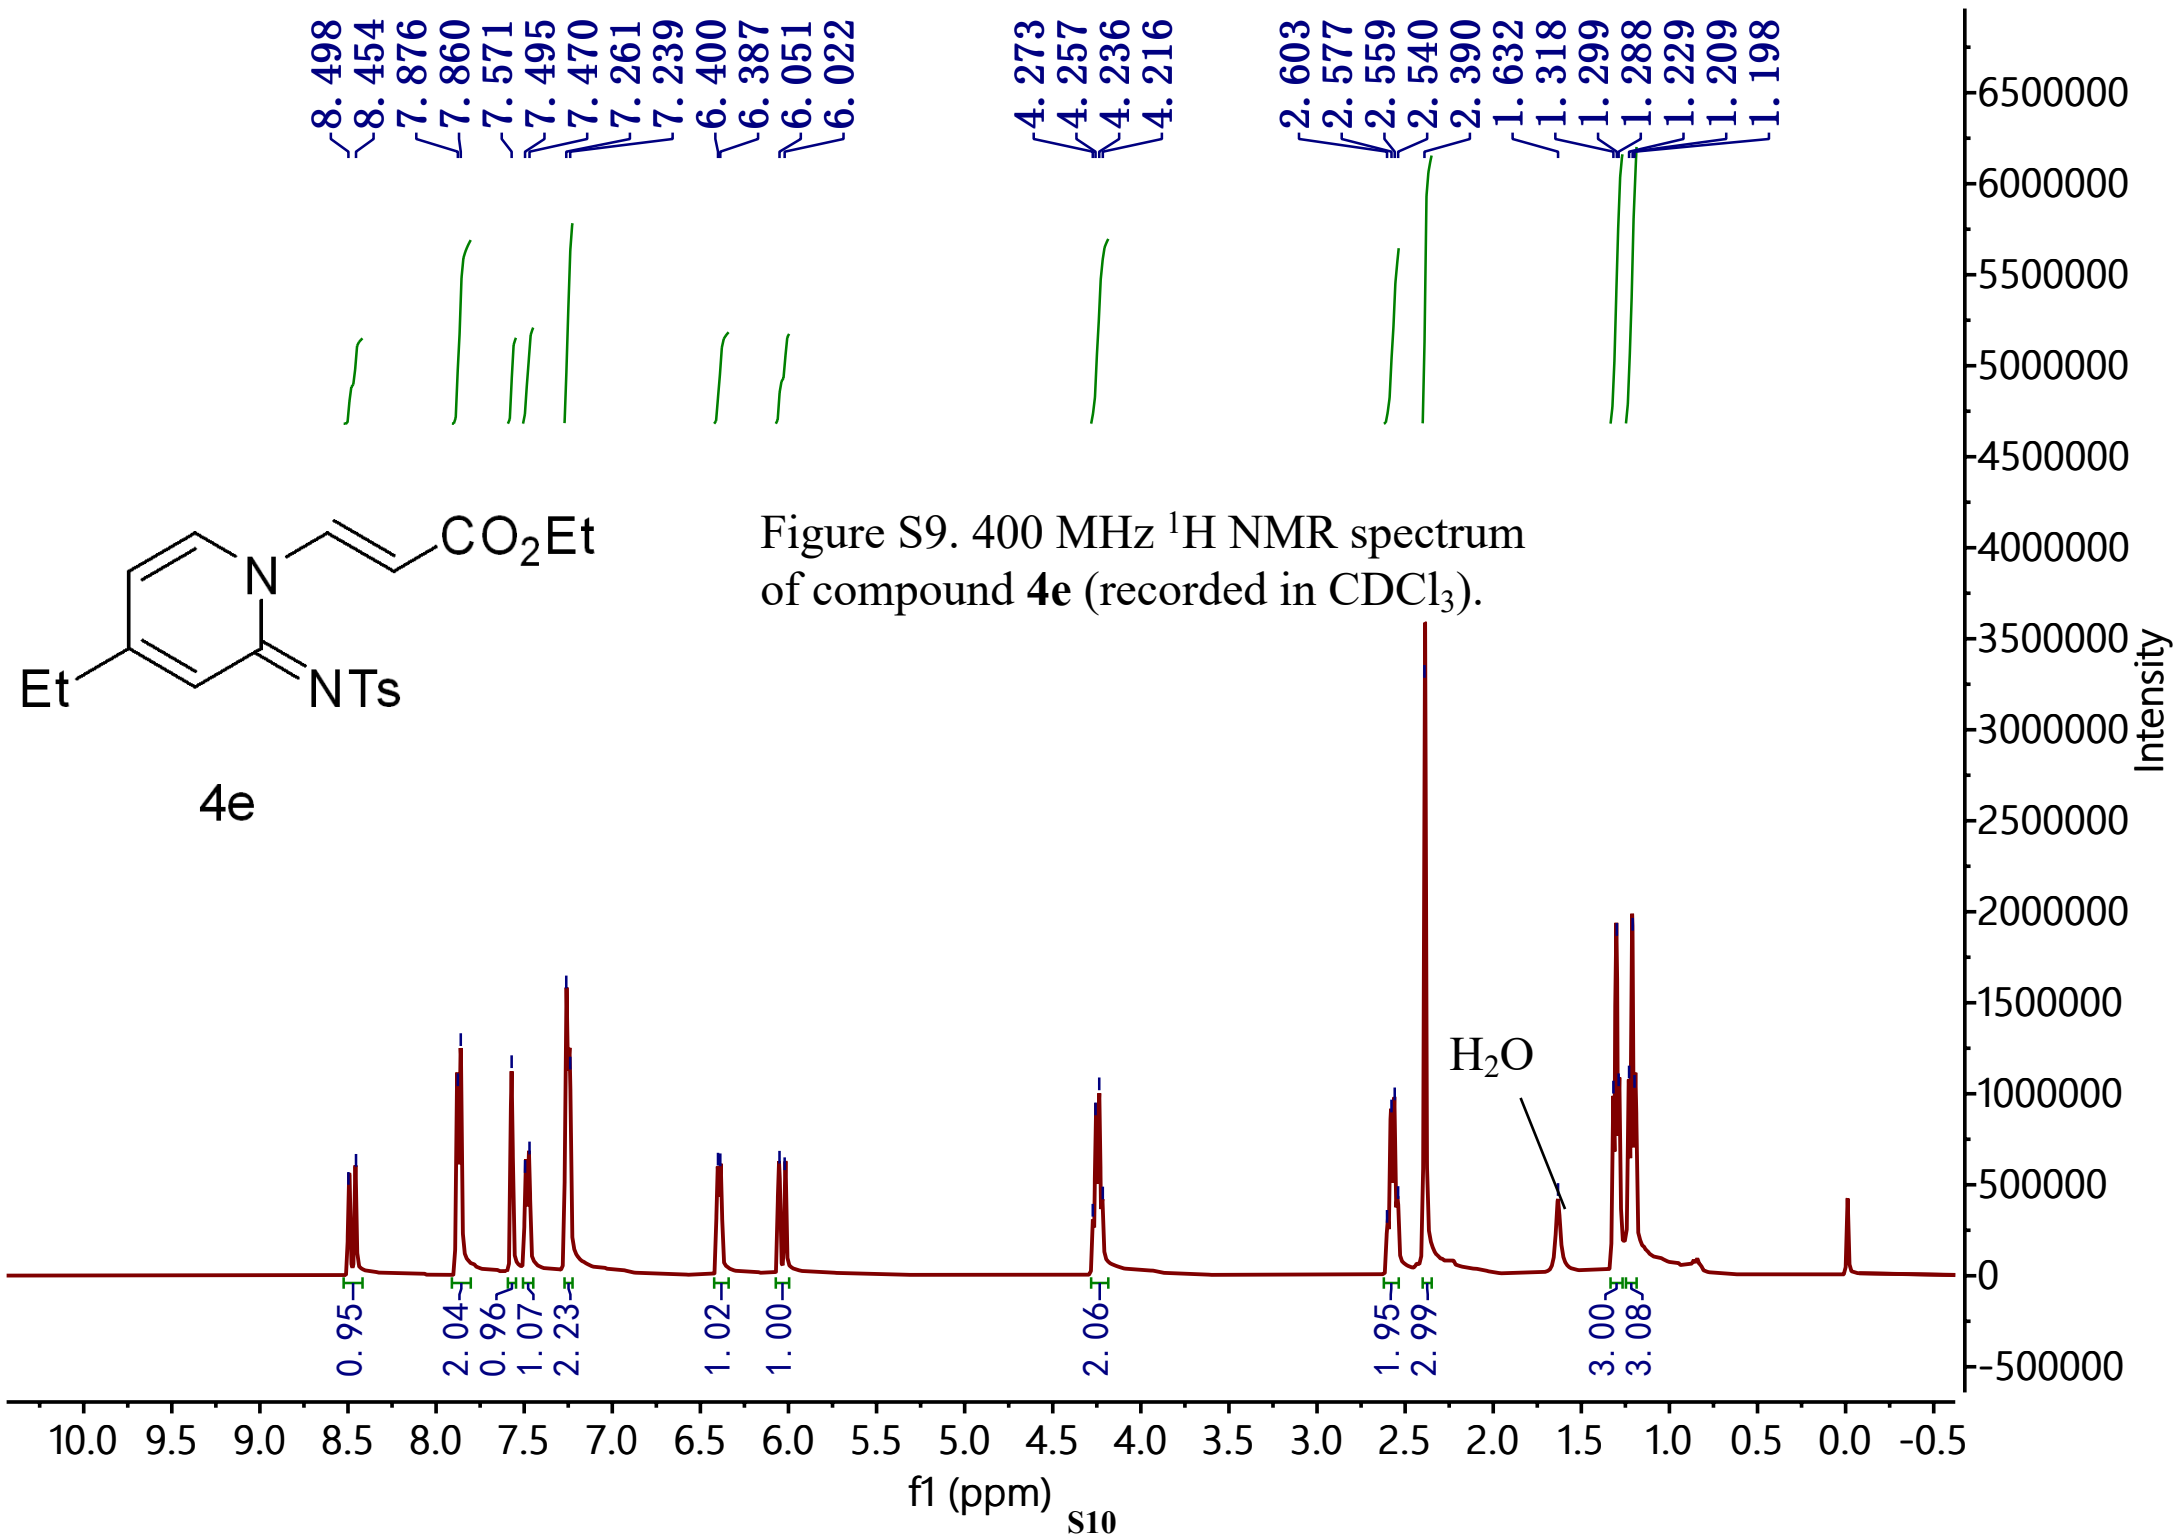

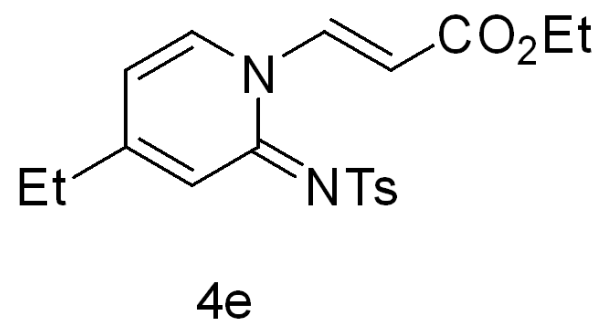

164.956  
159.164  
154.860  
142.320  
140.566  
140.241  
132.636  
129.326  
126.541  
116.345  
113.298  
112.607

77.477  
77.363  
77.159  
76.842  
61.347  
29.052  
21.593  
14.295  
13.098

Figure S10. 100 MHz  $^{13}\text{C}\{^1\text{H}\}$  NMR spectrum of compound **4e** (recorded in  $\text{CDCl}_3$ ).

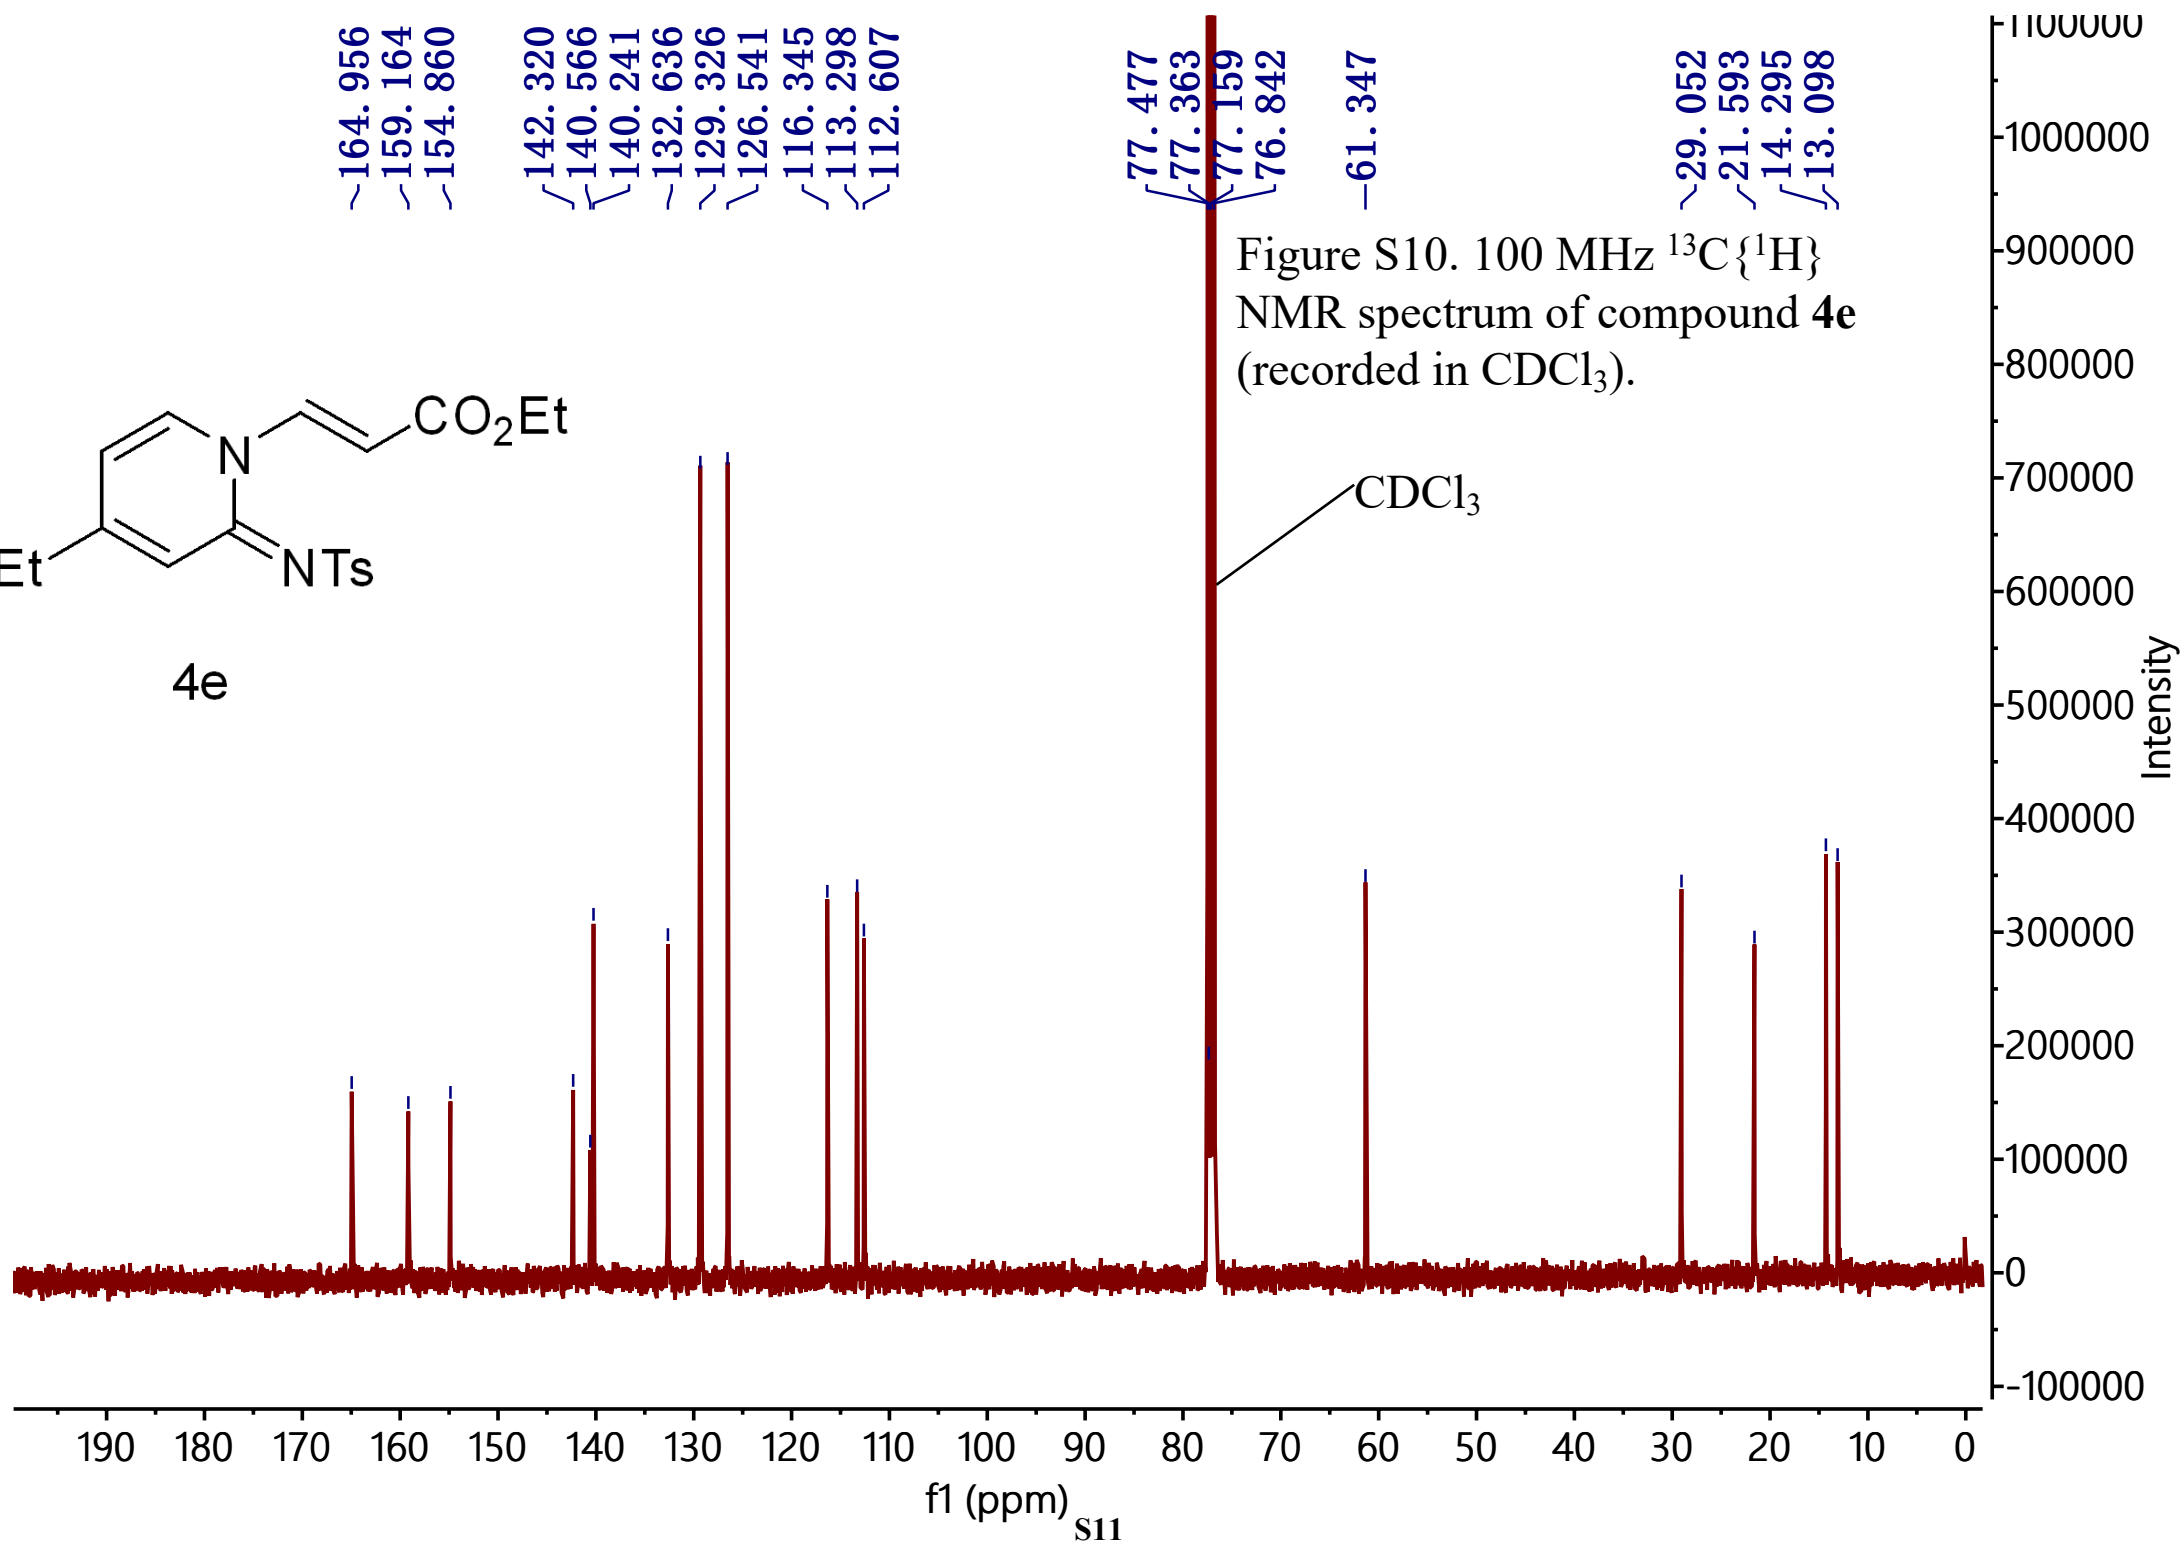

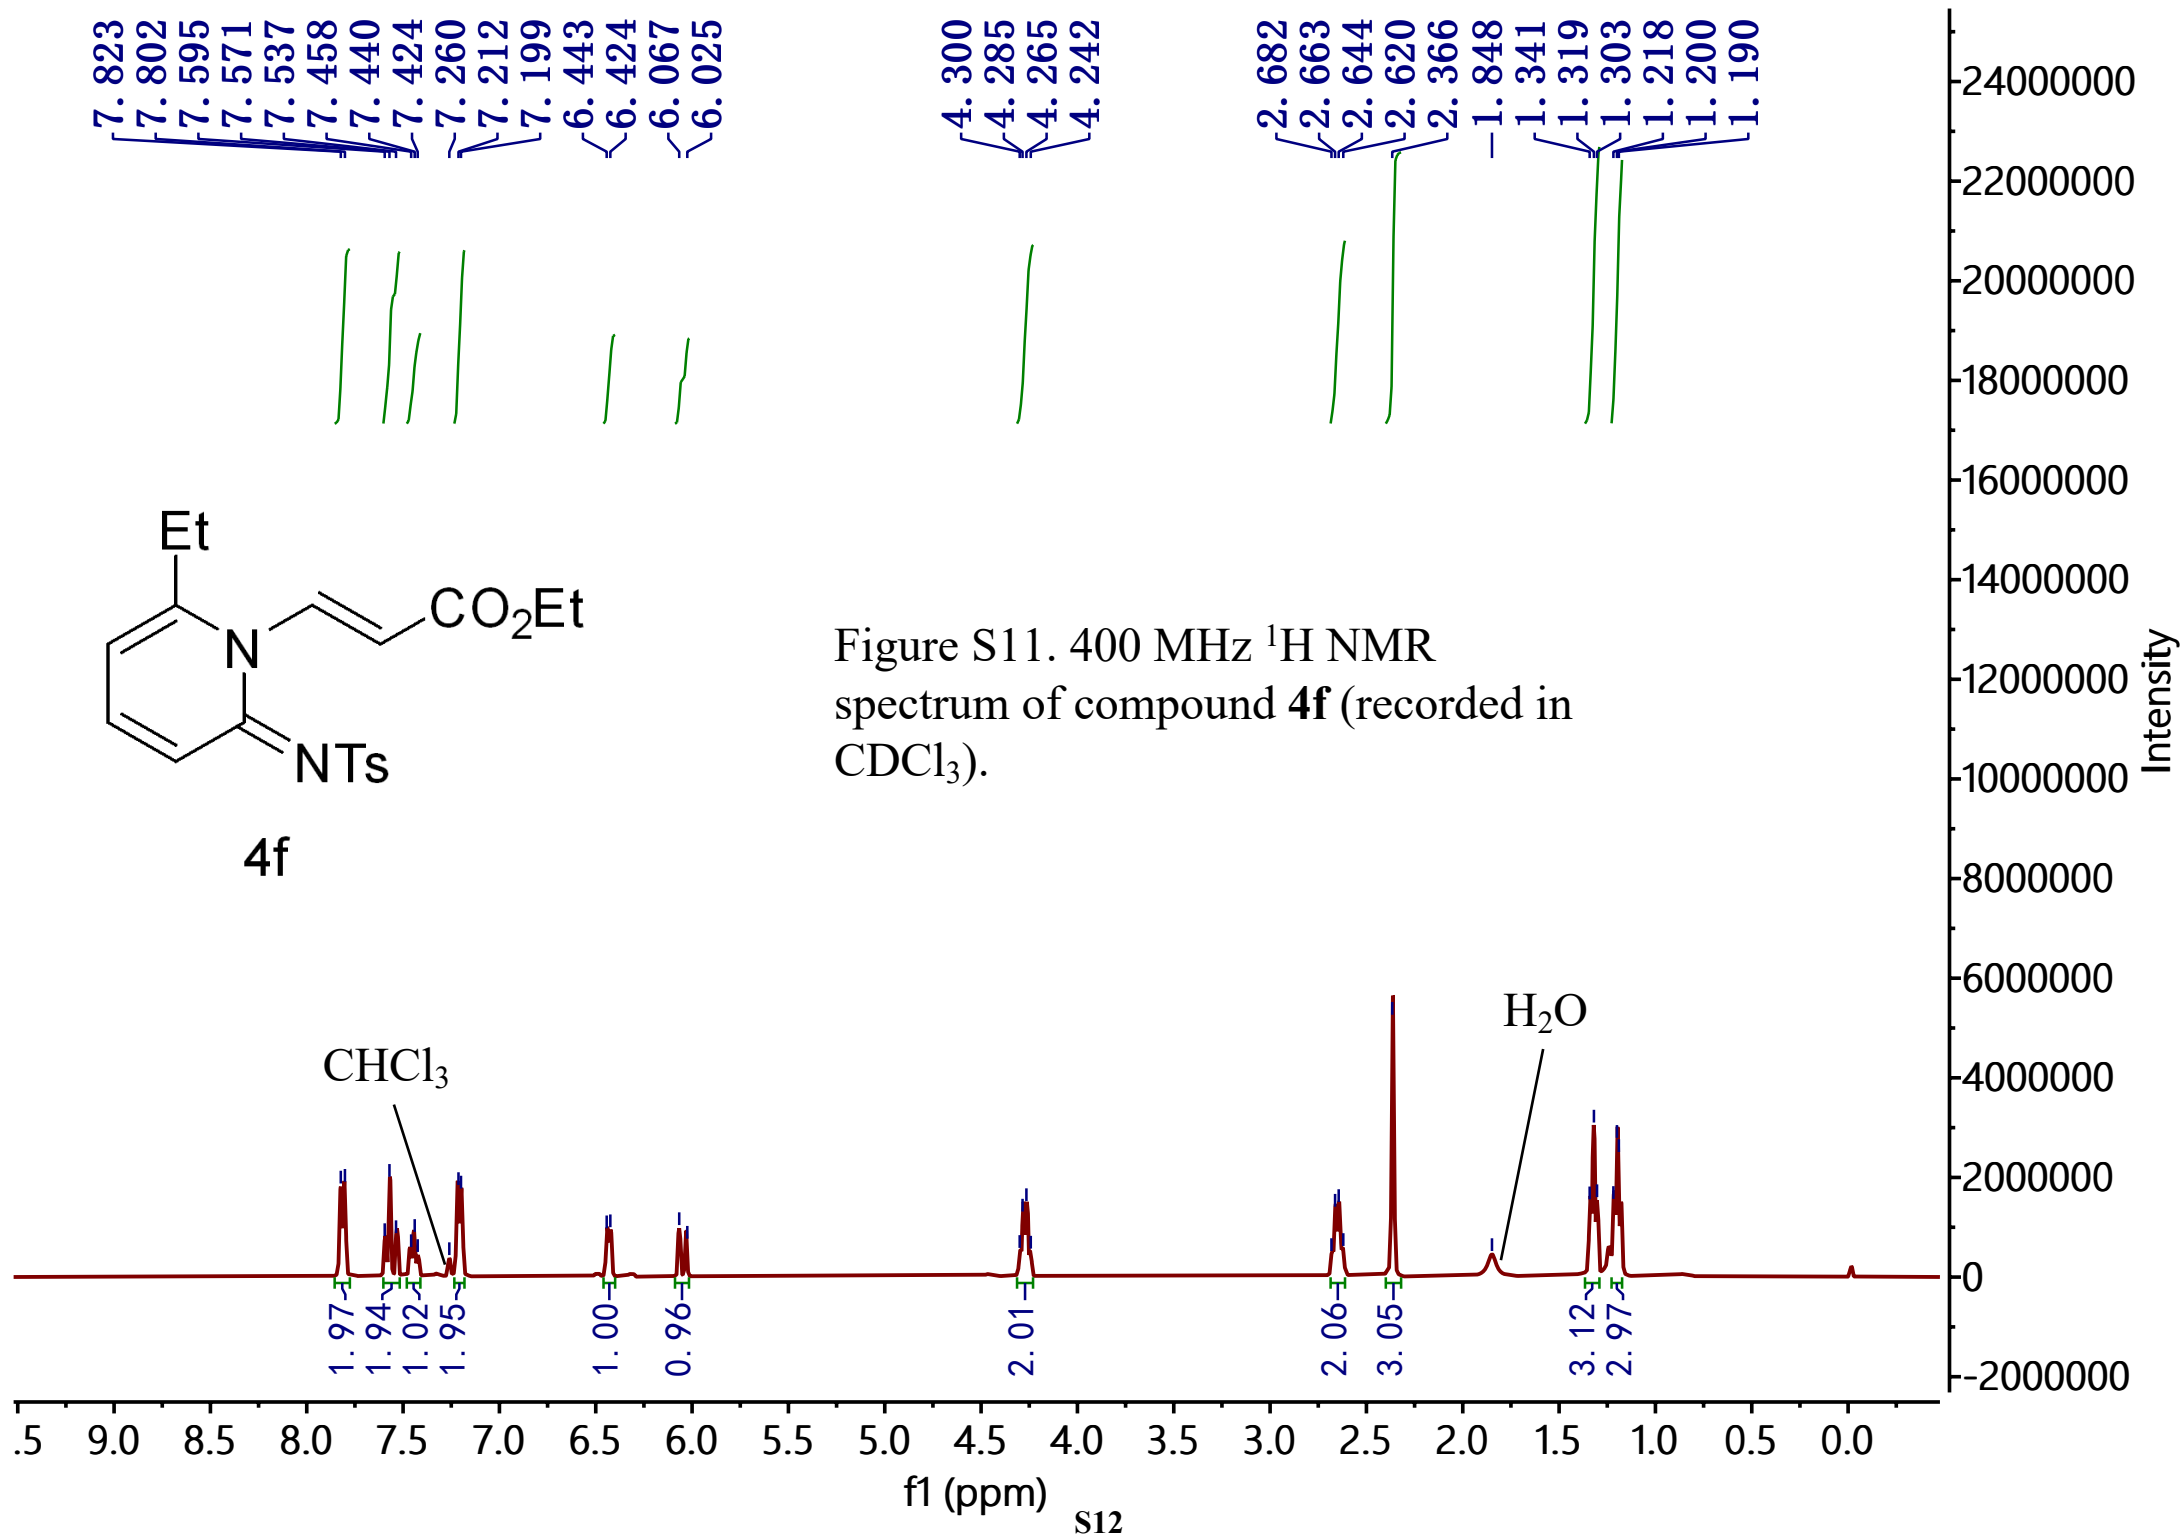

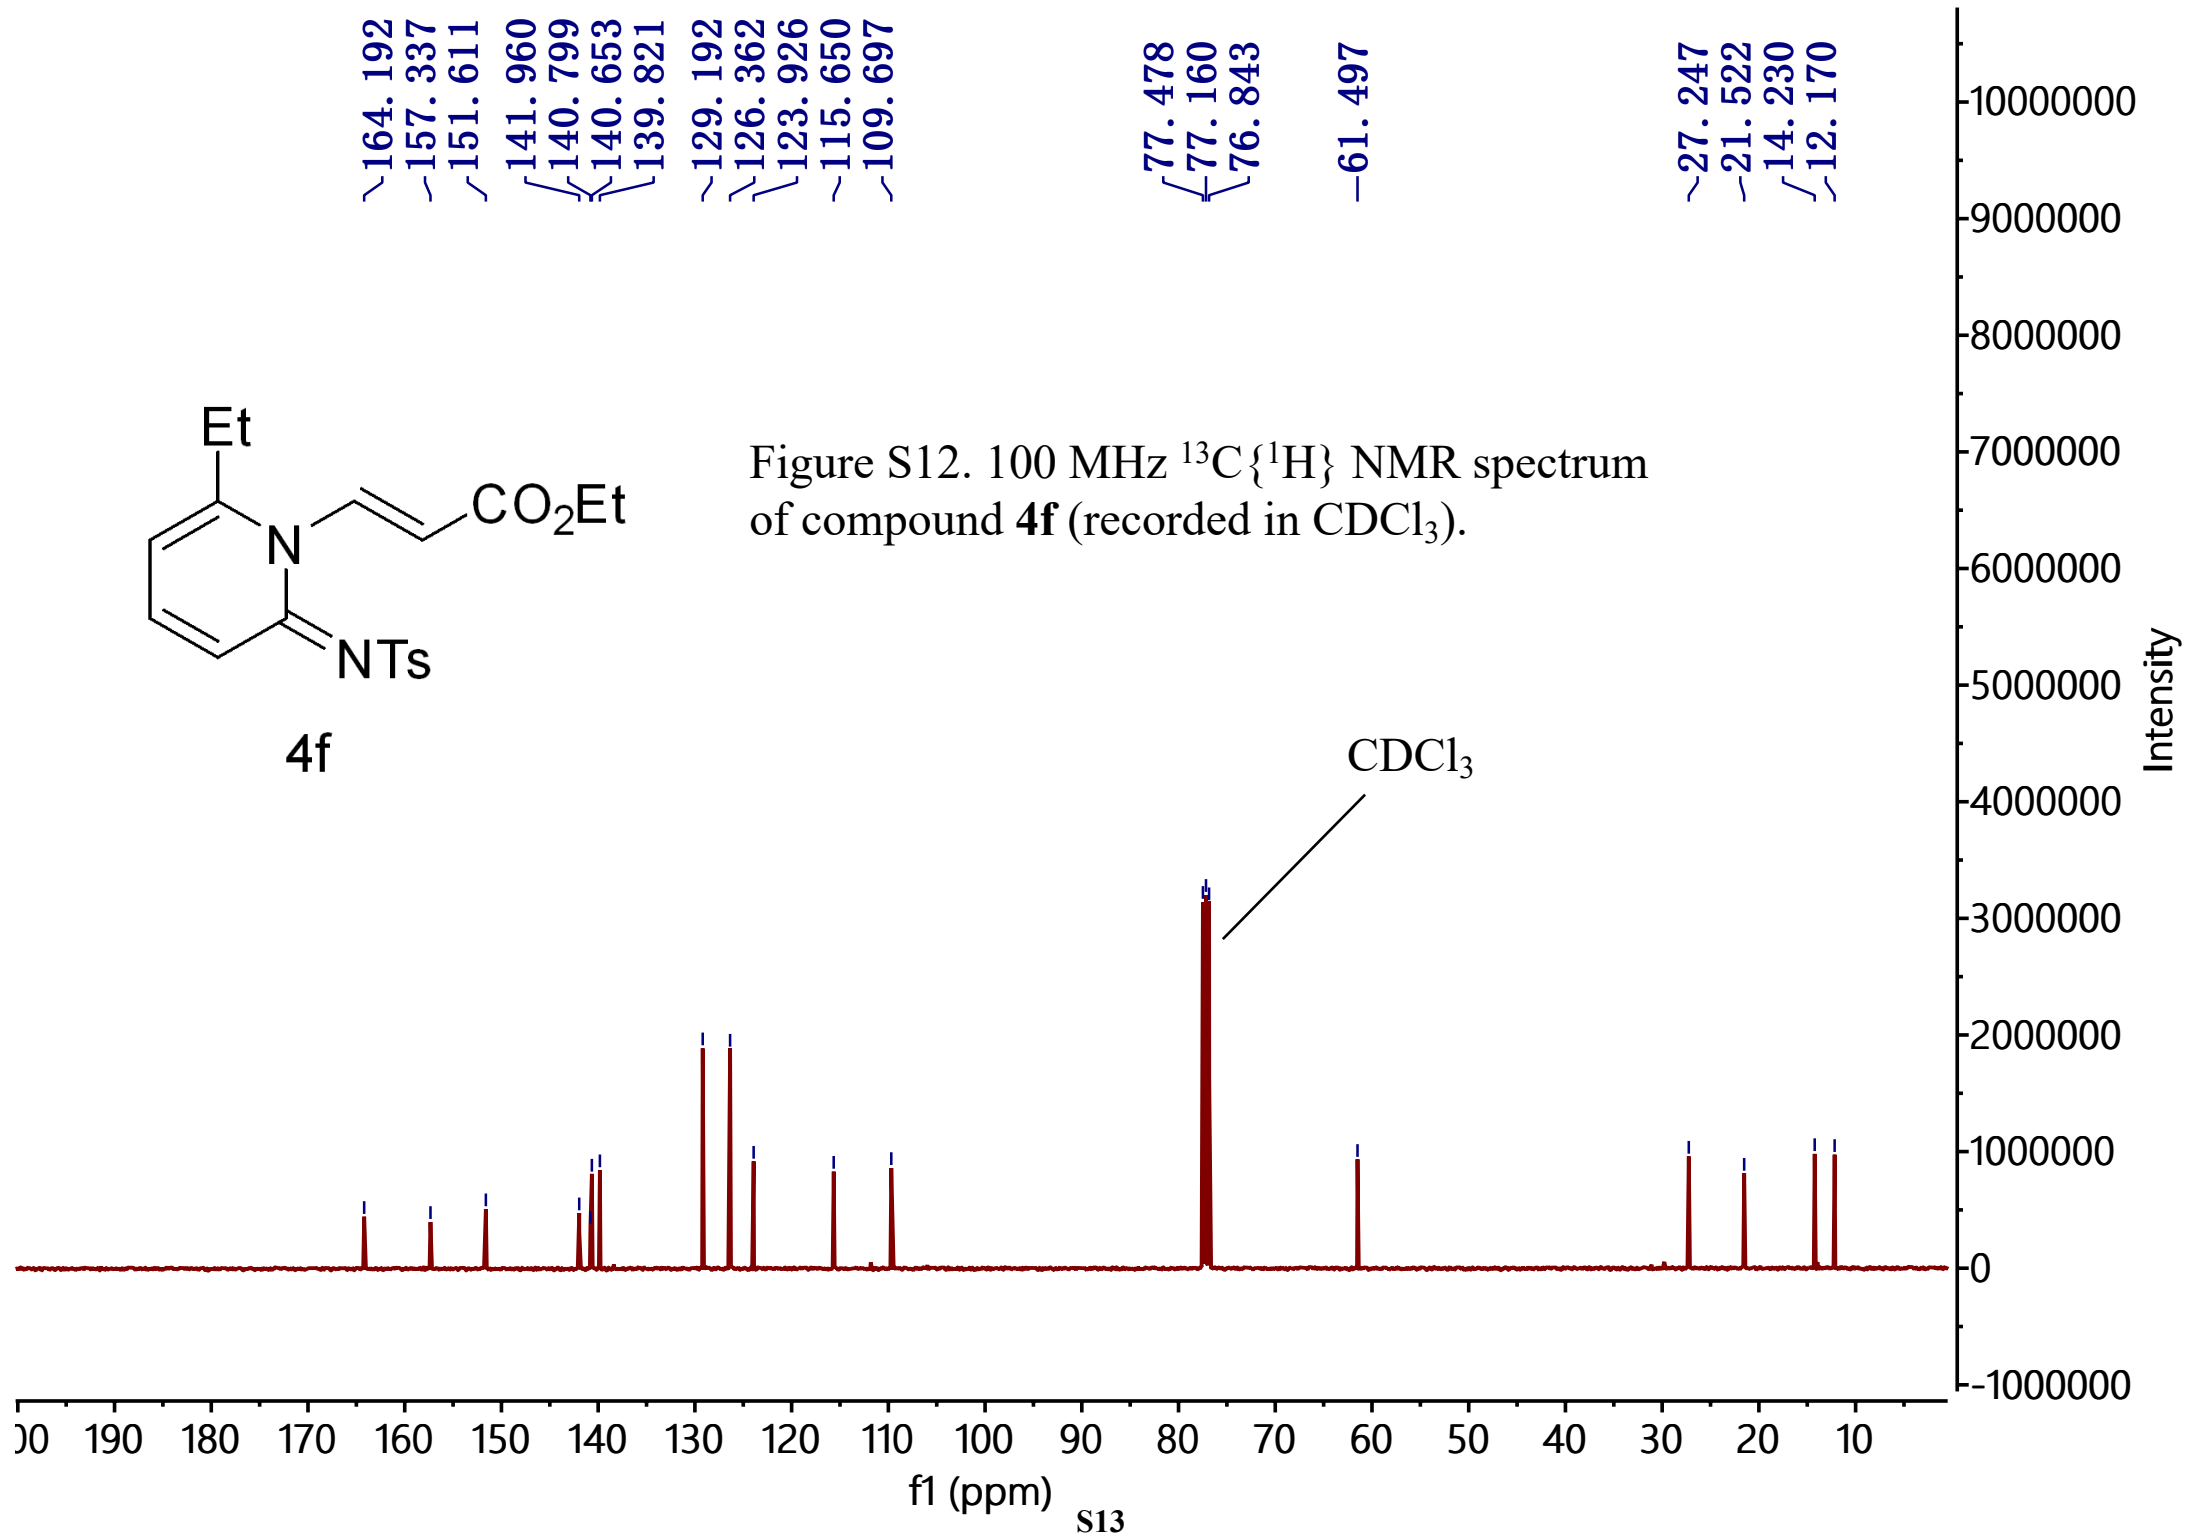

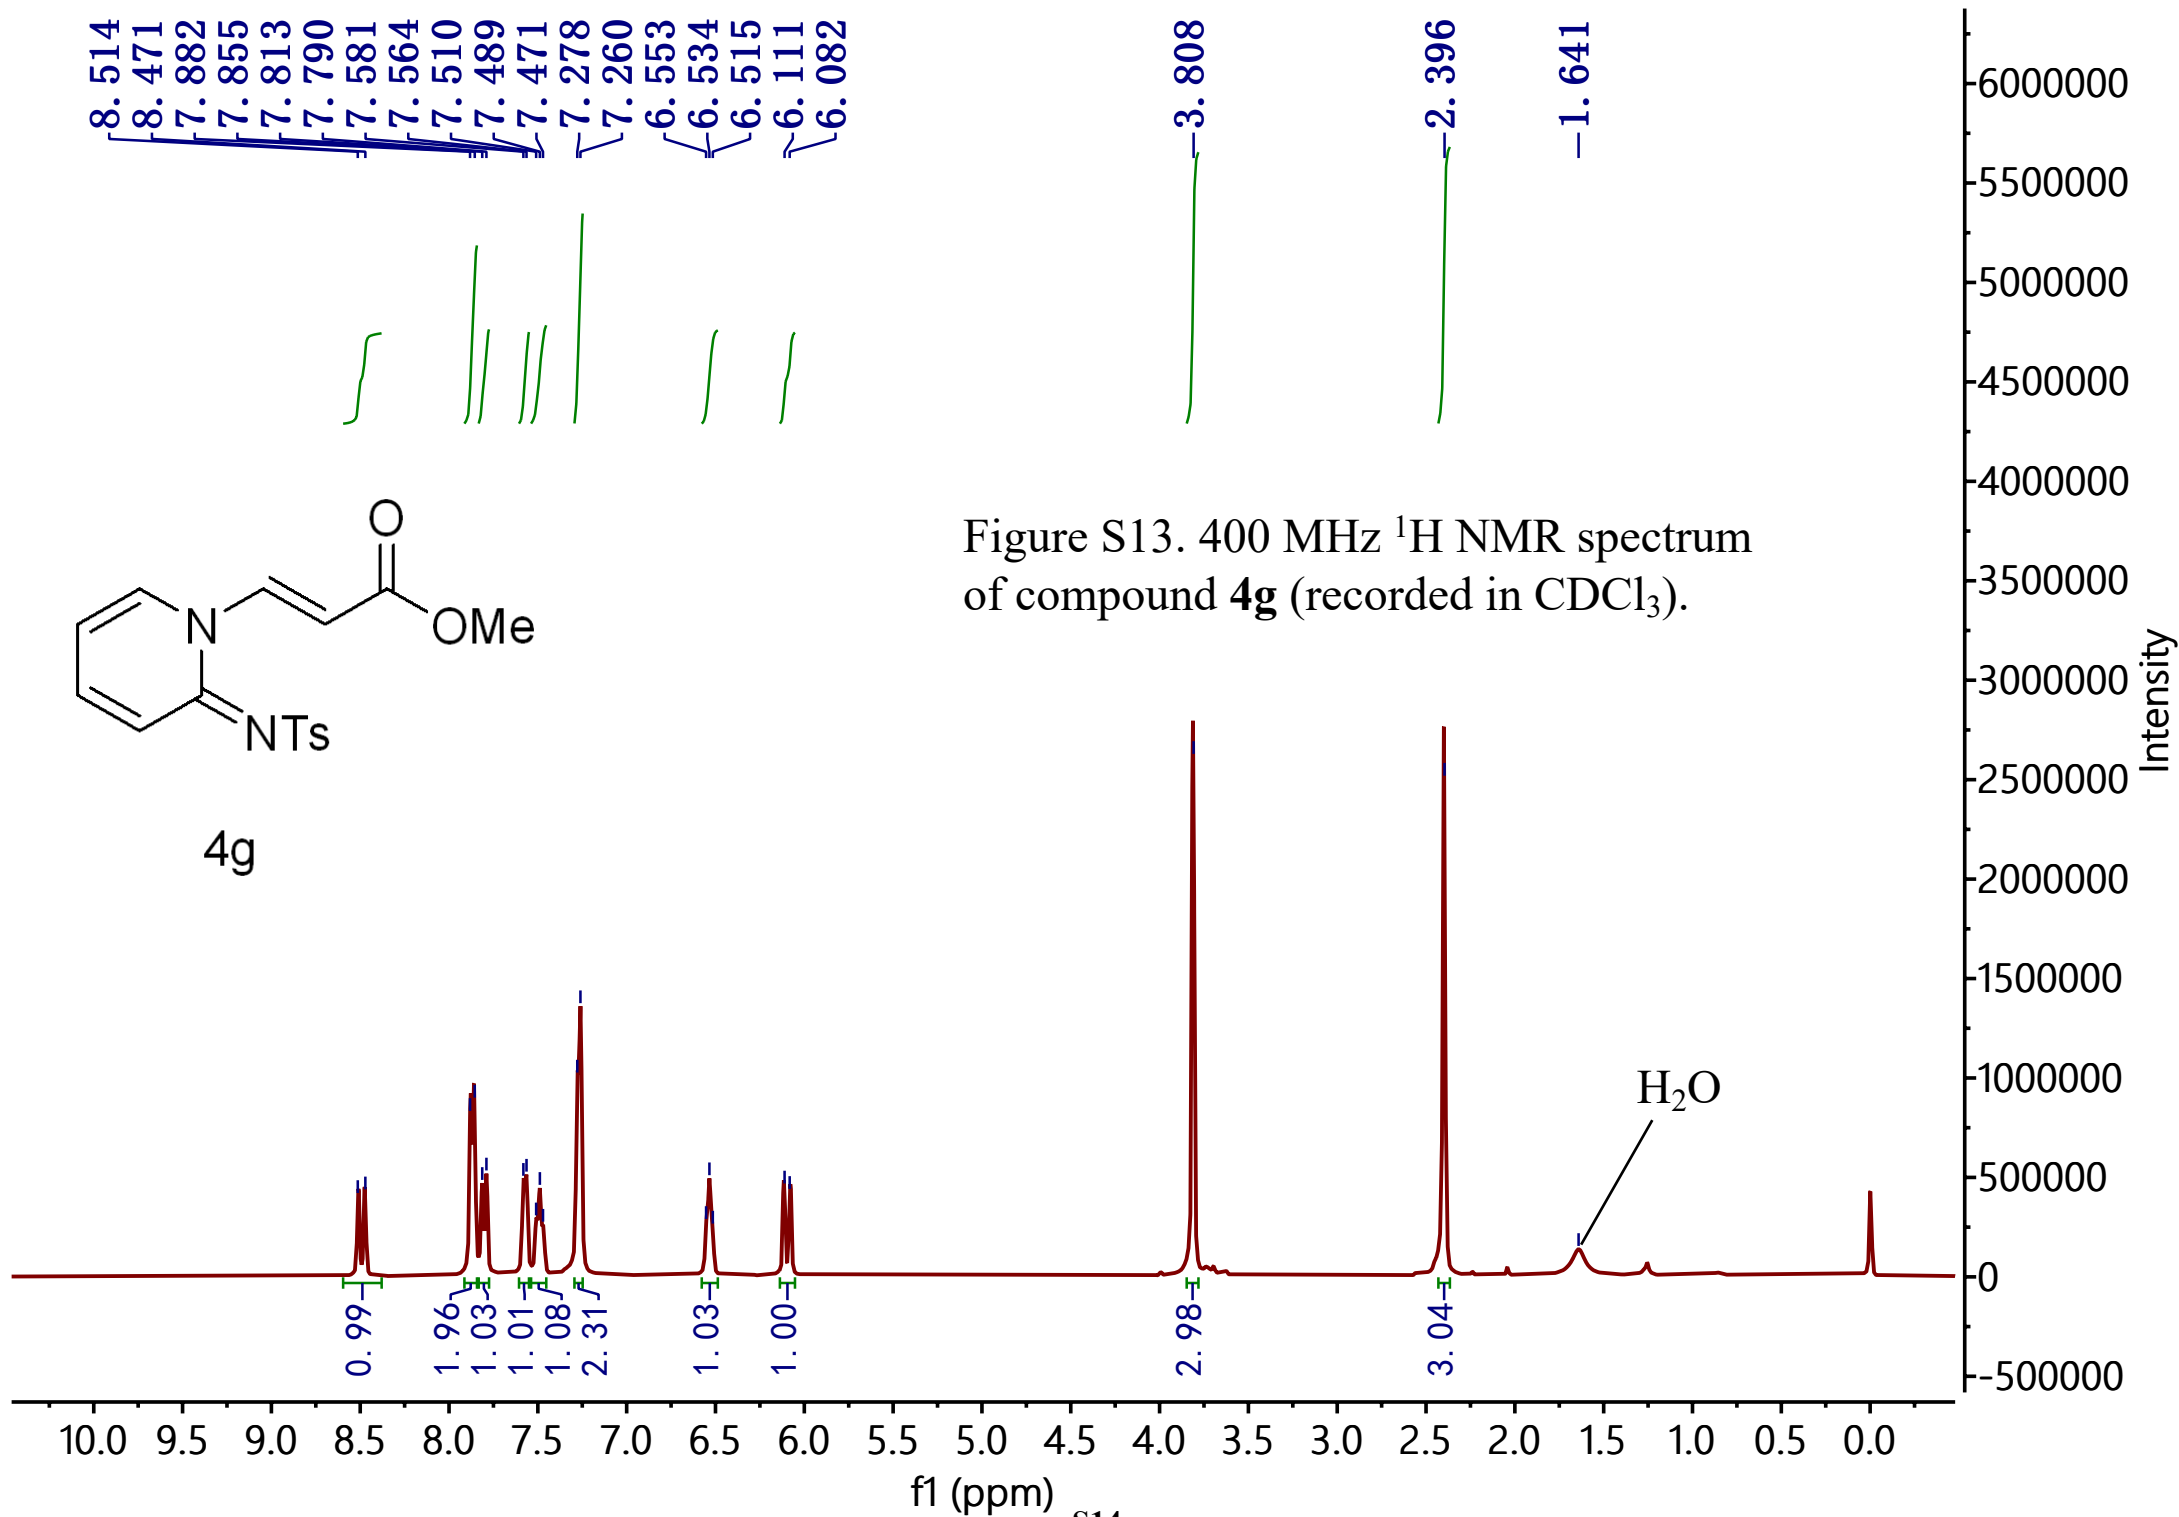

-165.235  
 -155.214  
 142.559  
 140.738  
 140.689  
 140.219  
 133.627  
 129.438  
 126.593  
 119.289  
 113.932  
 111.101  
 77.478  
 77.160  
 76.842  
 -52.429  
 -21.622

Figure S14. 100 MHz  $^{13}\text{C}\{^1\text{H}\}$  NMR spectrum of compound **4g** (recorded in  $\text{CDCl}_3$ ).

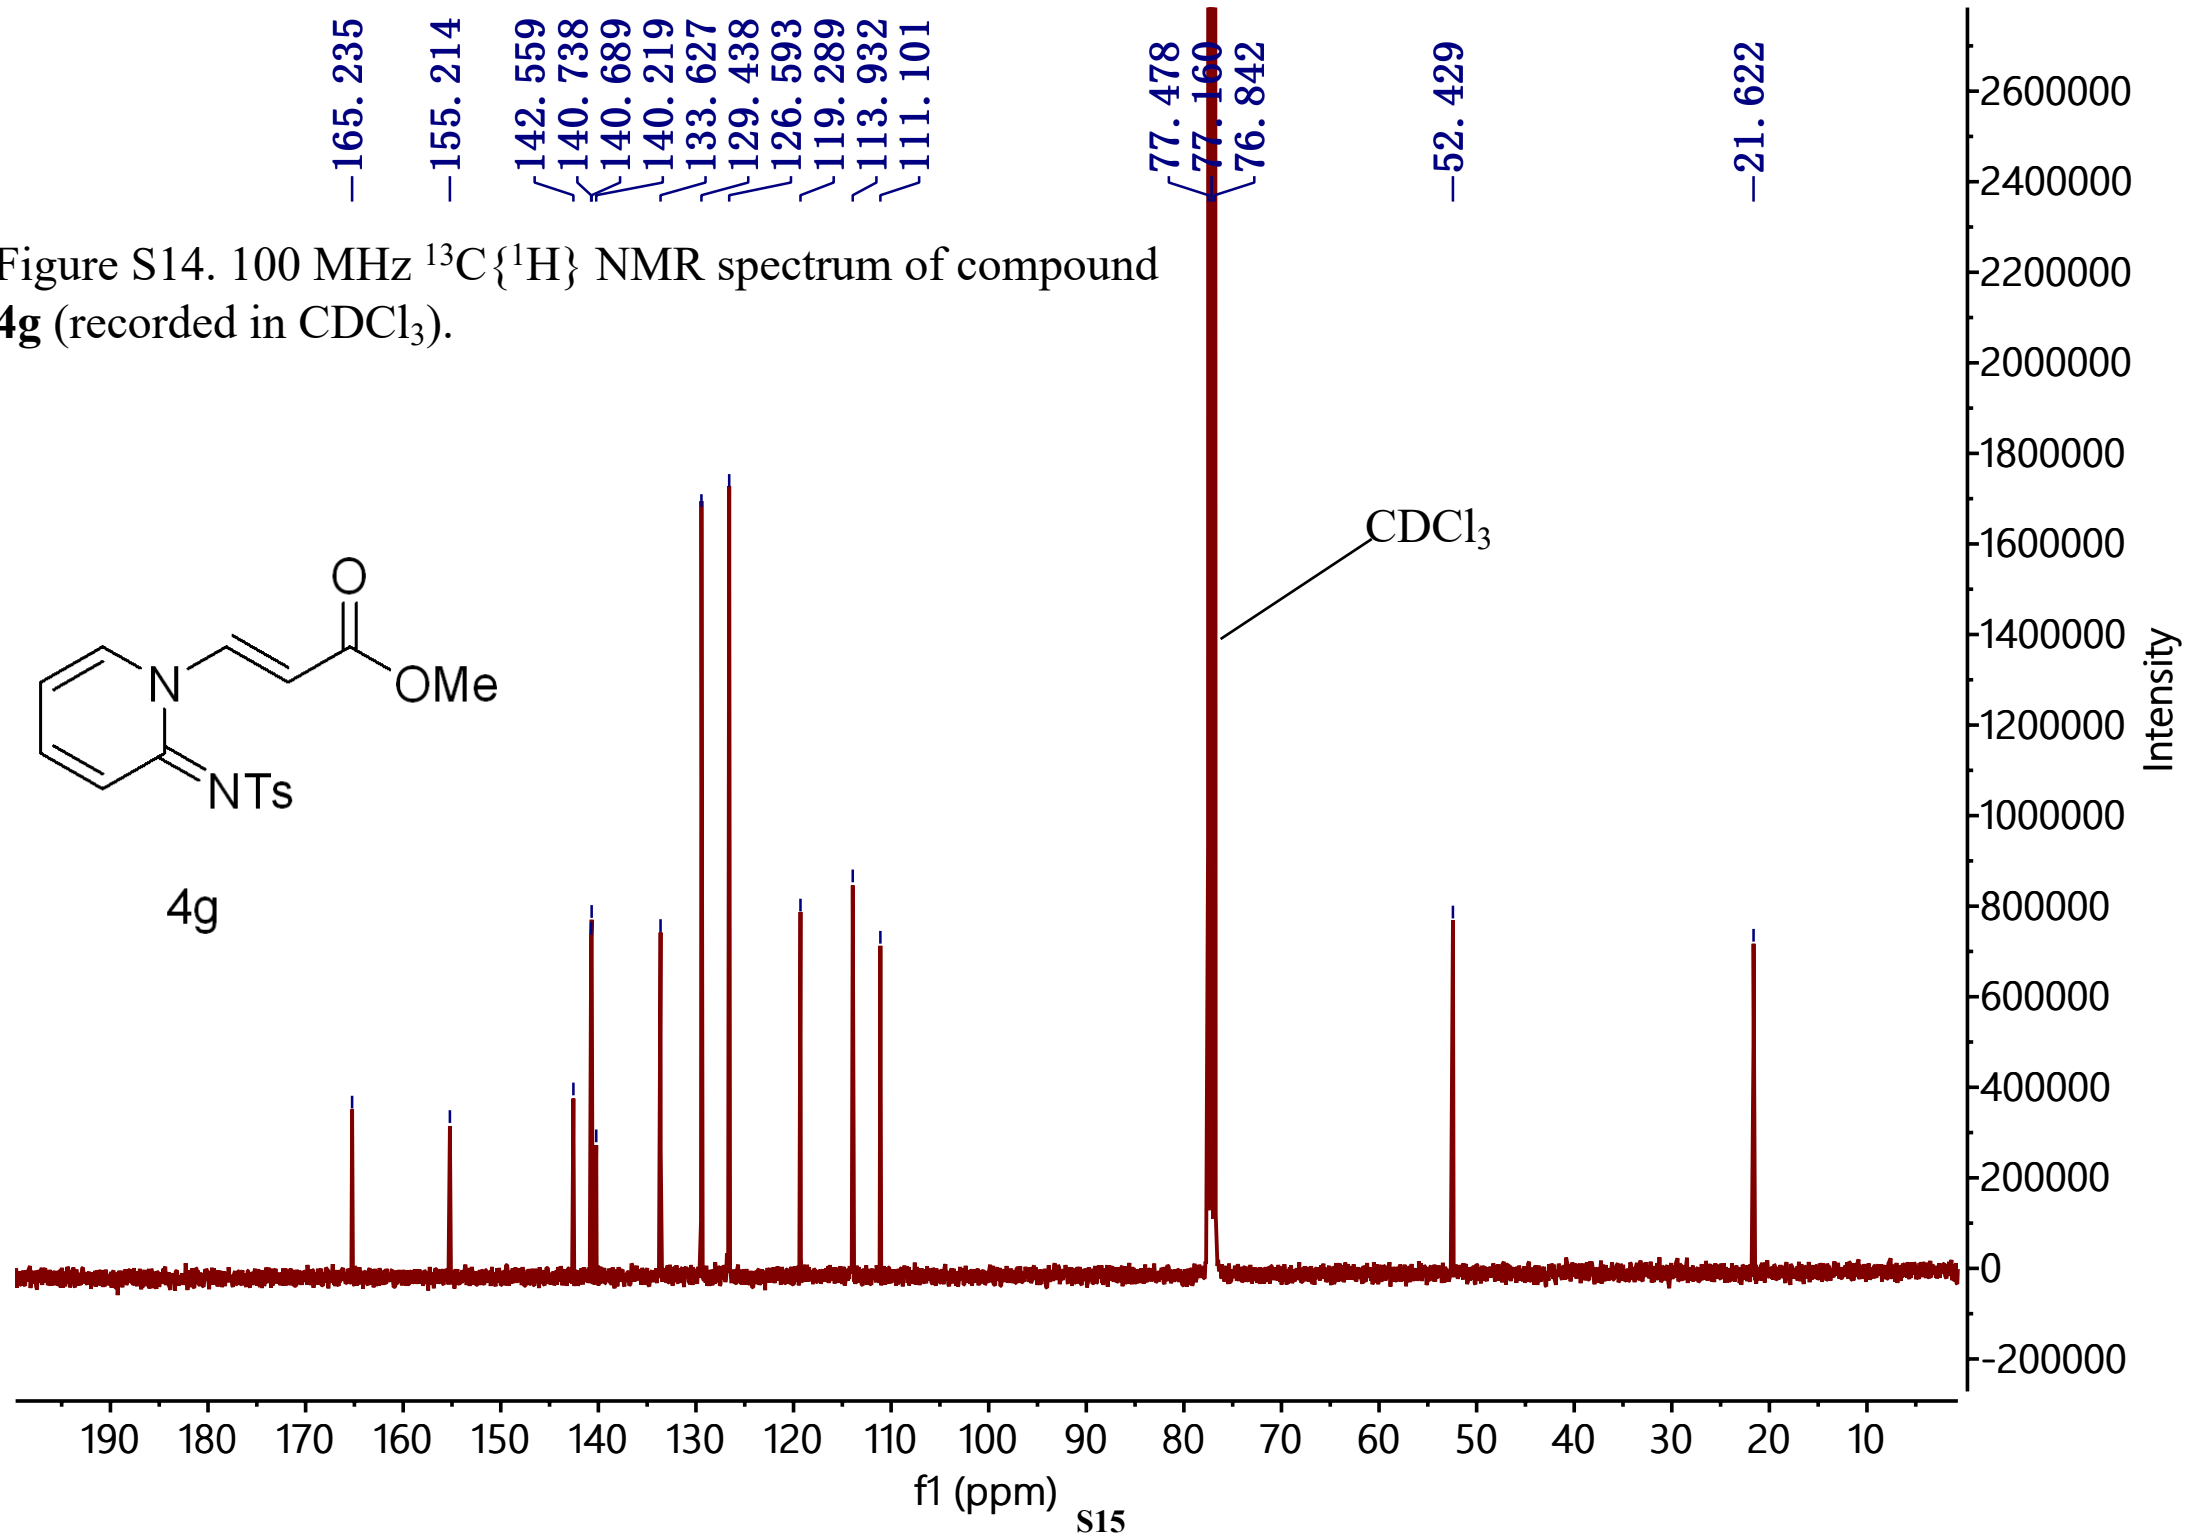

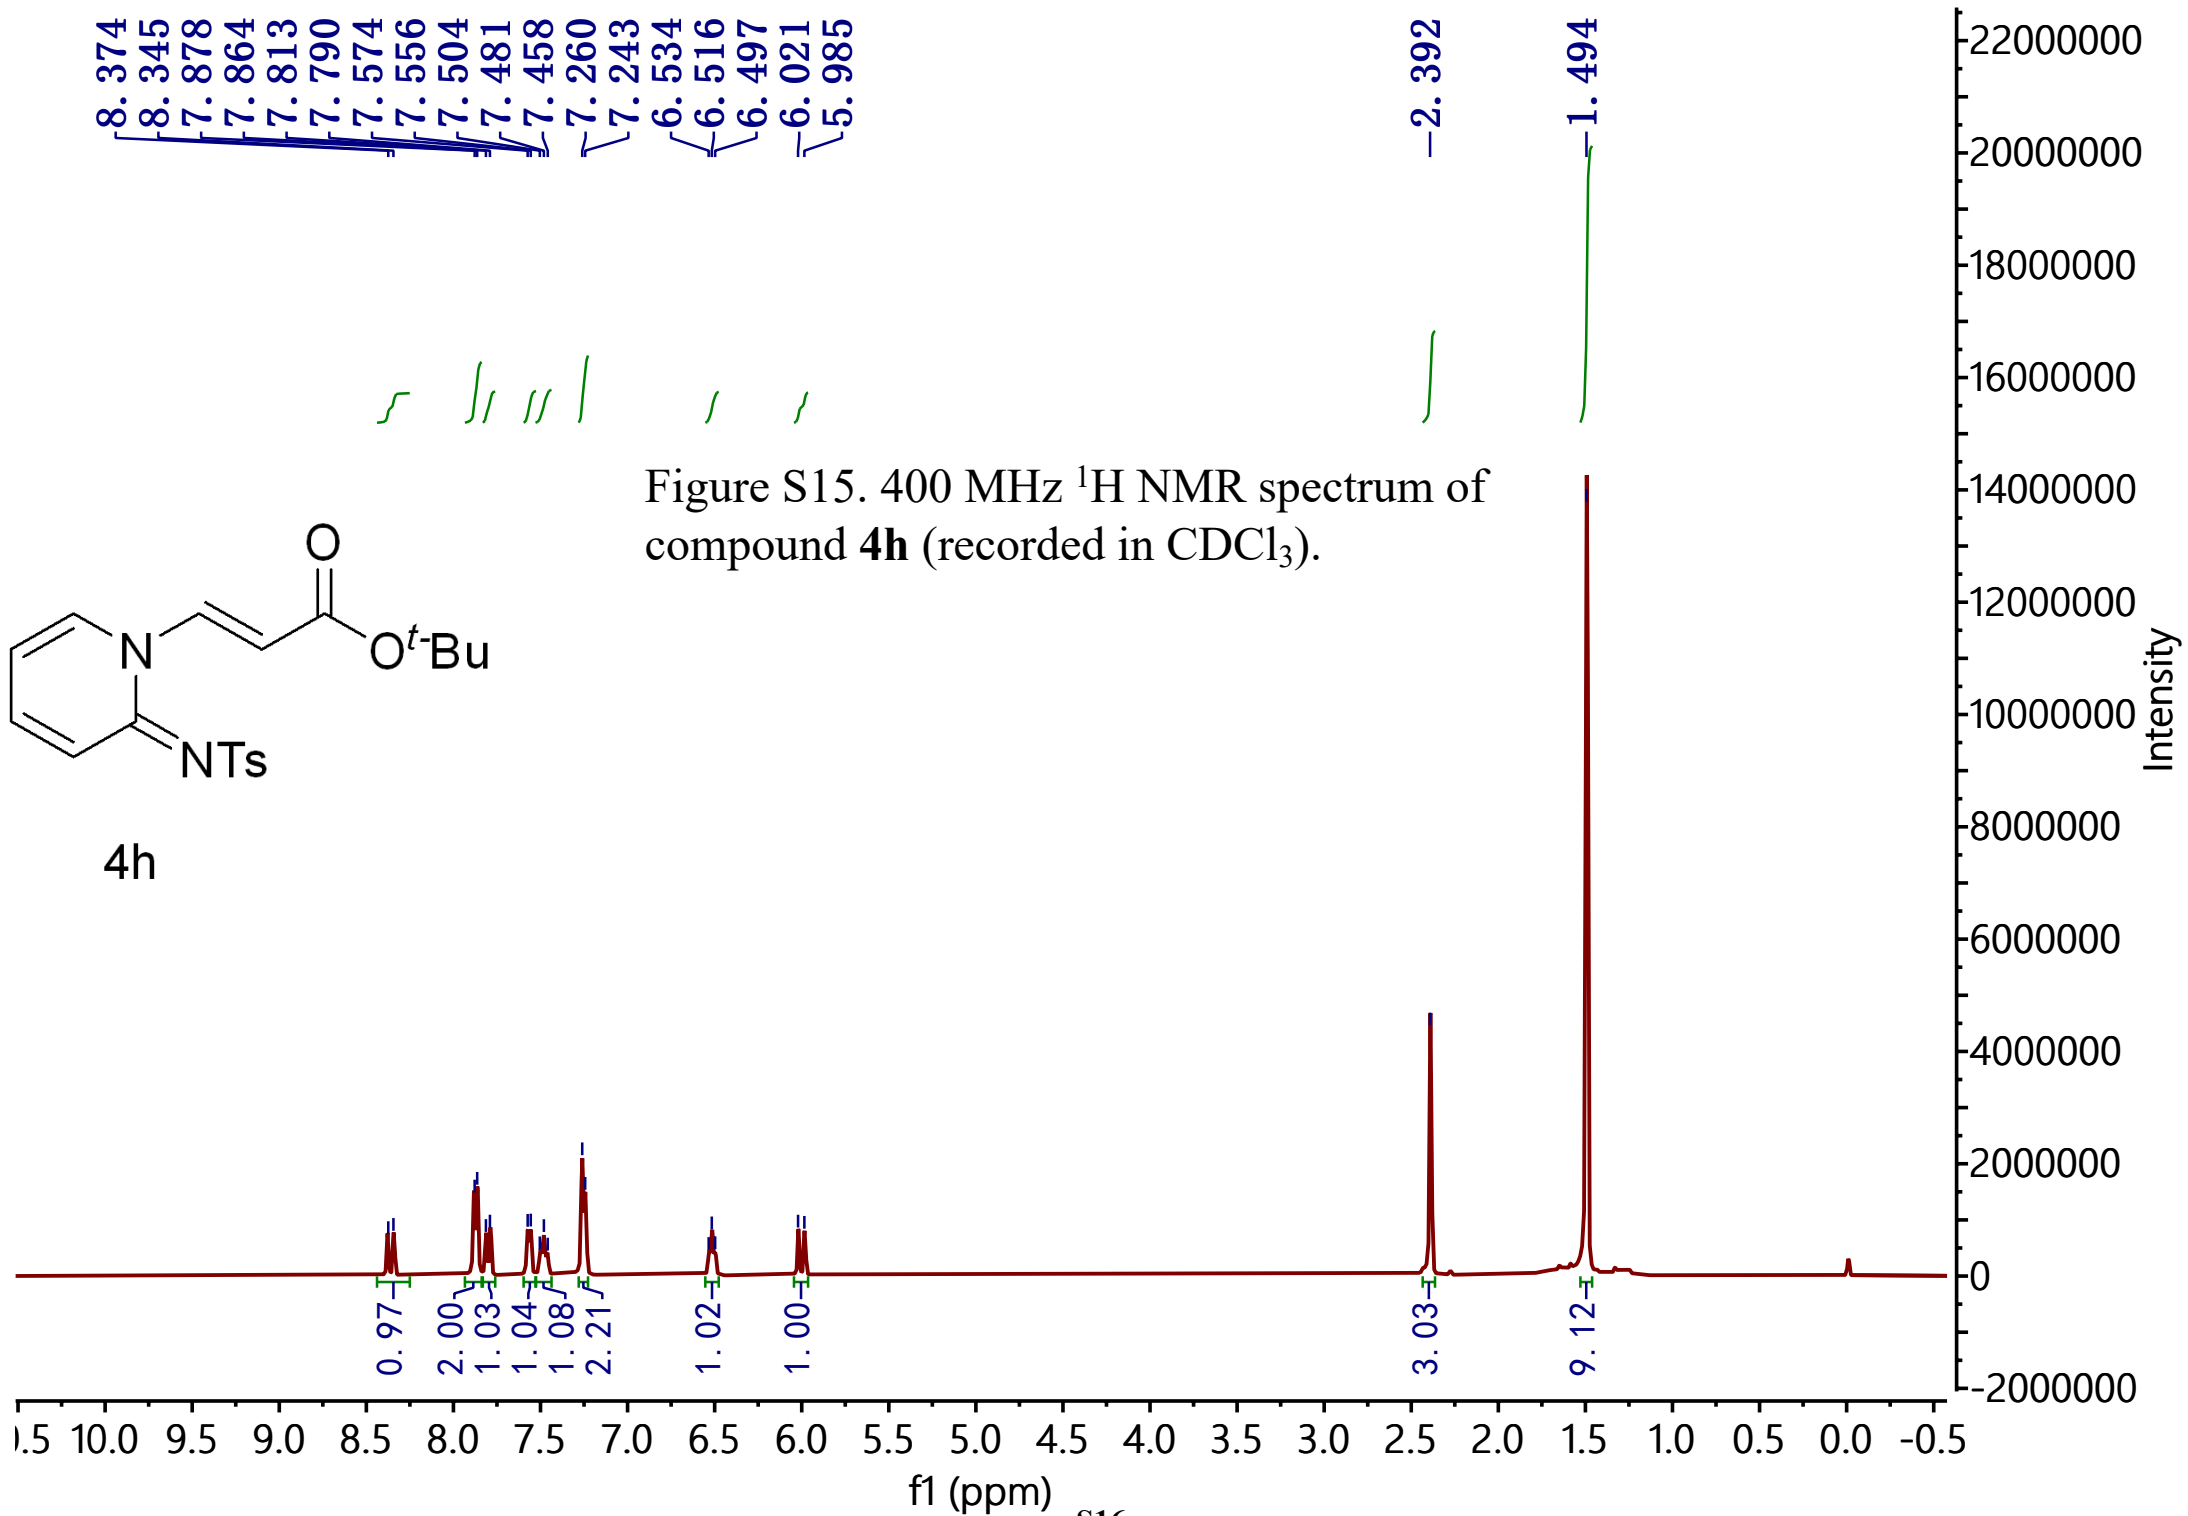



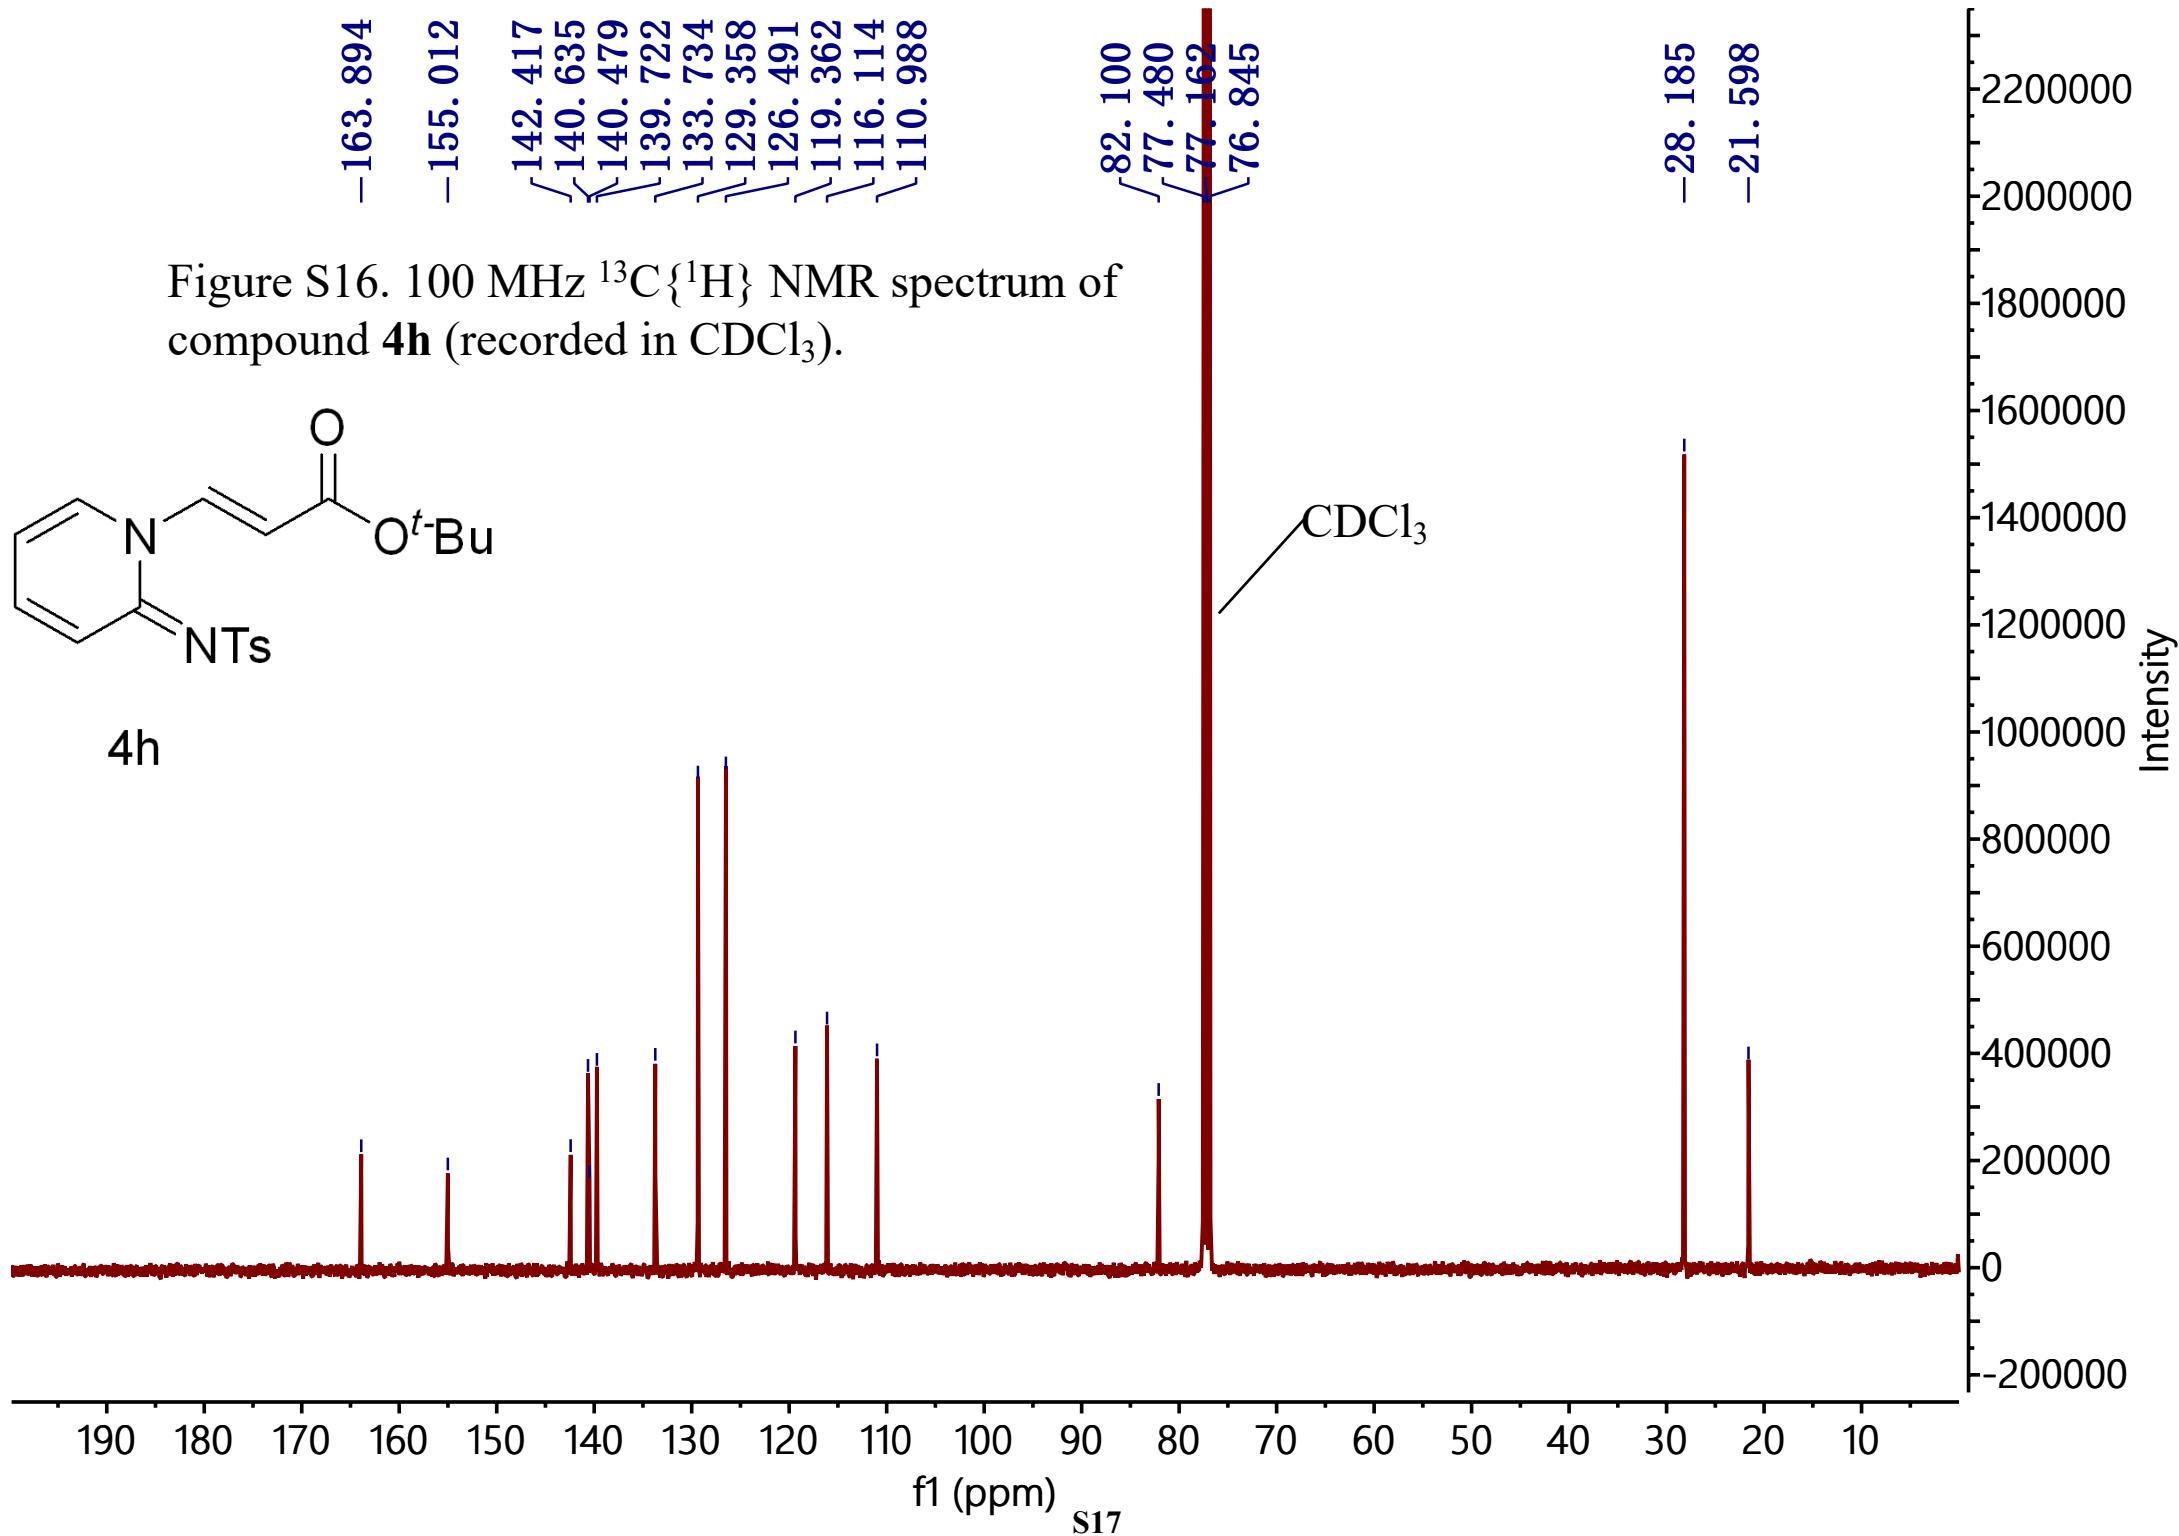

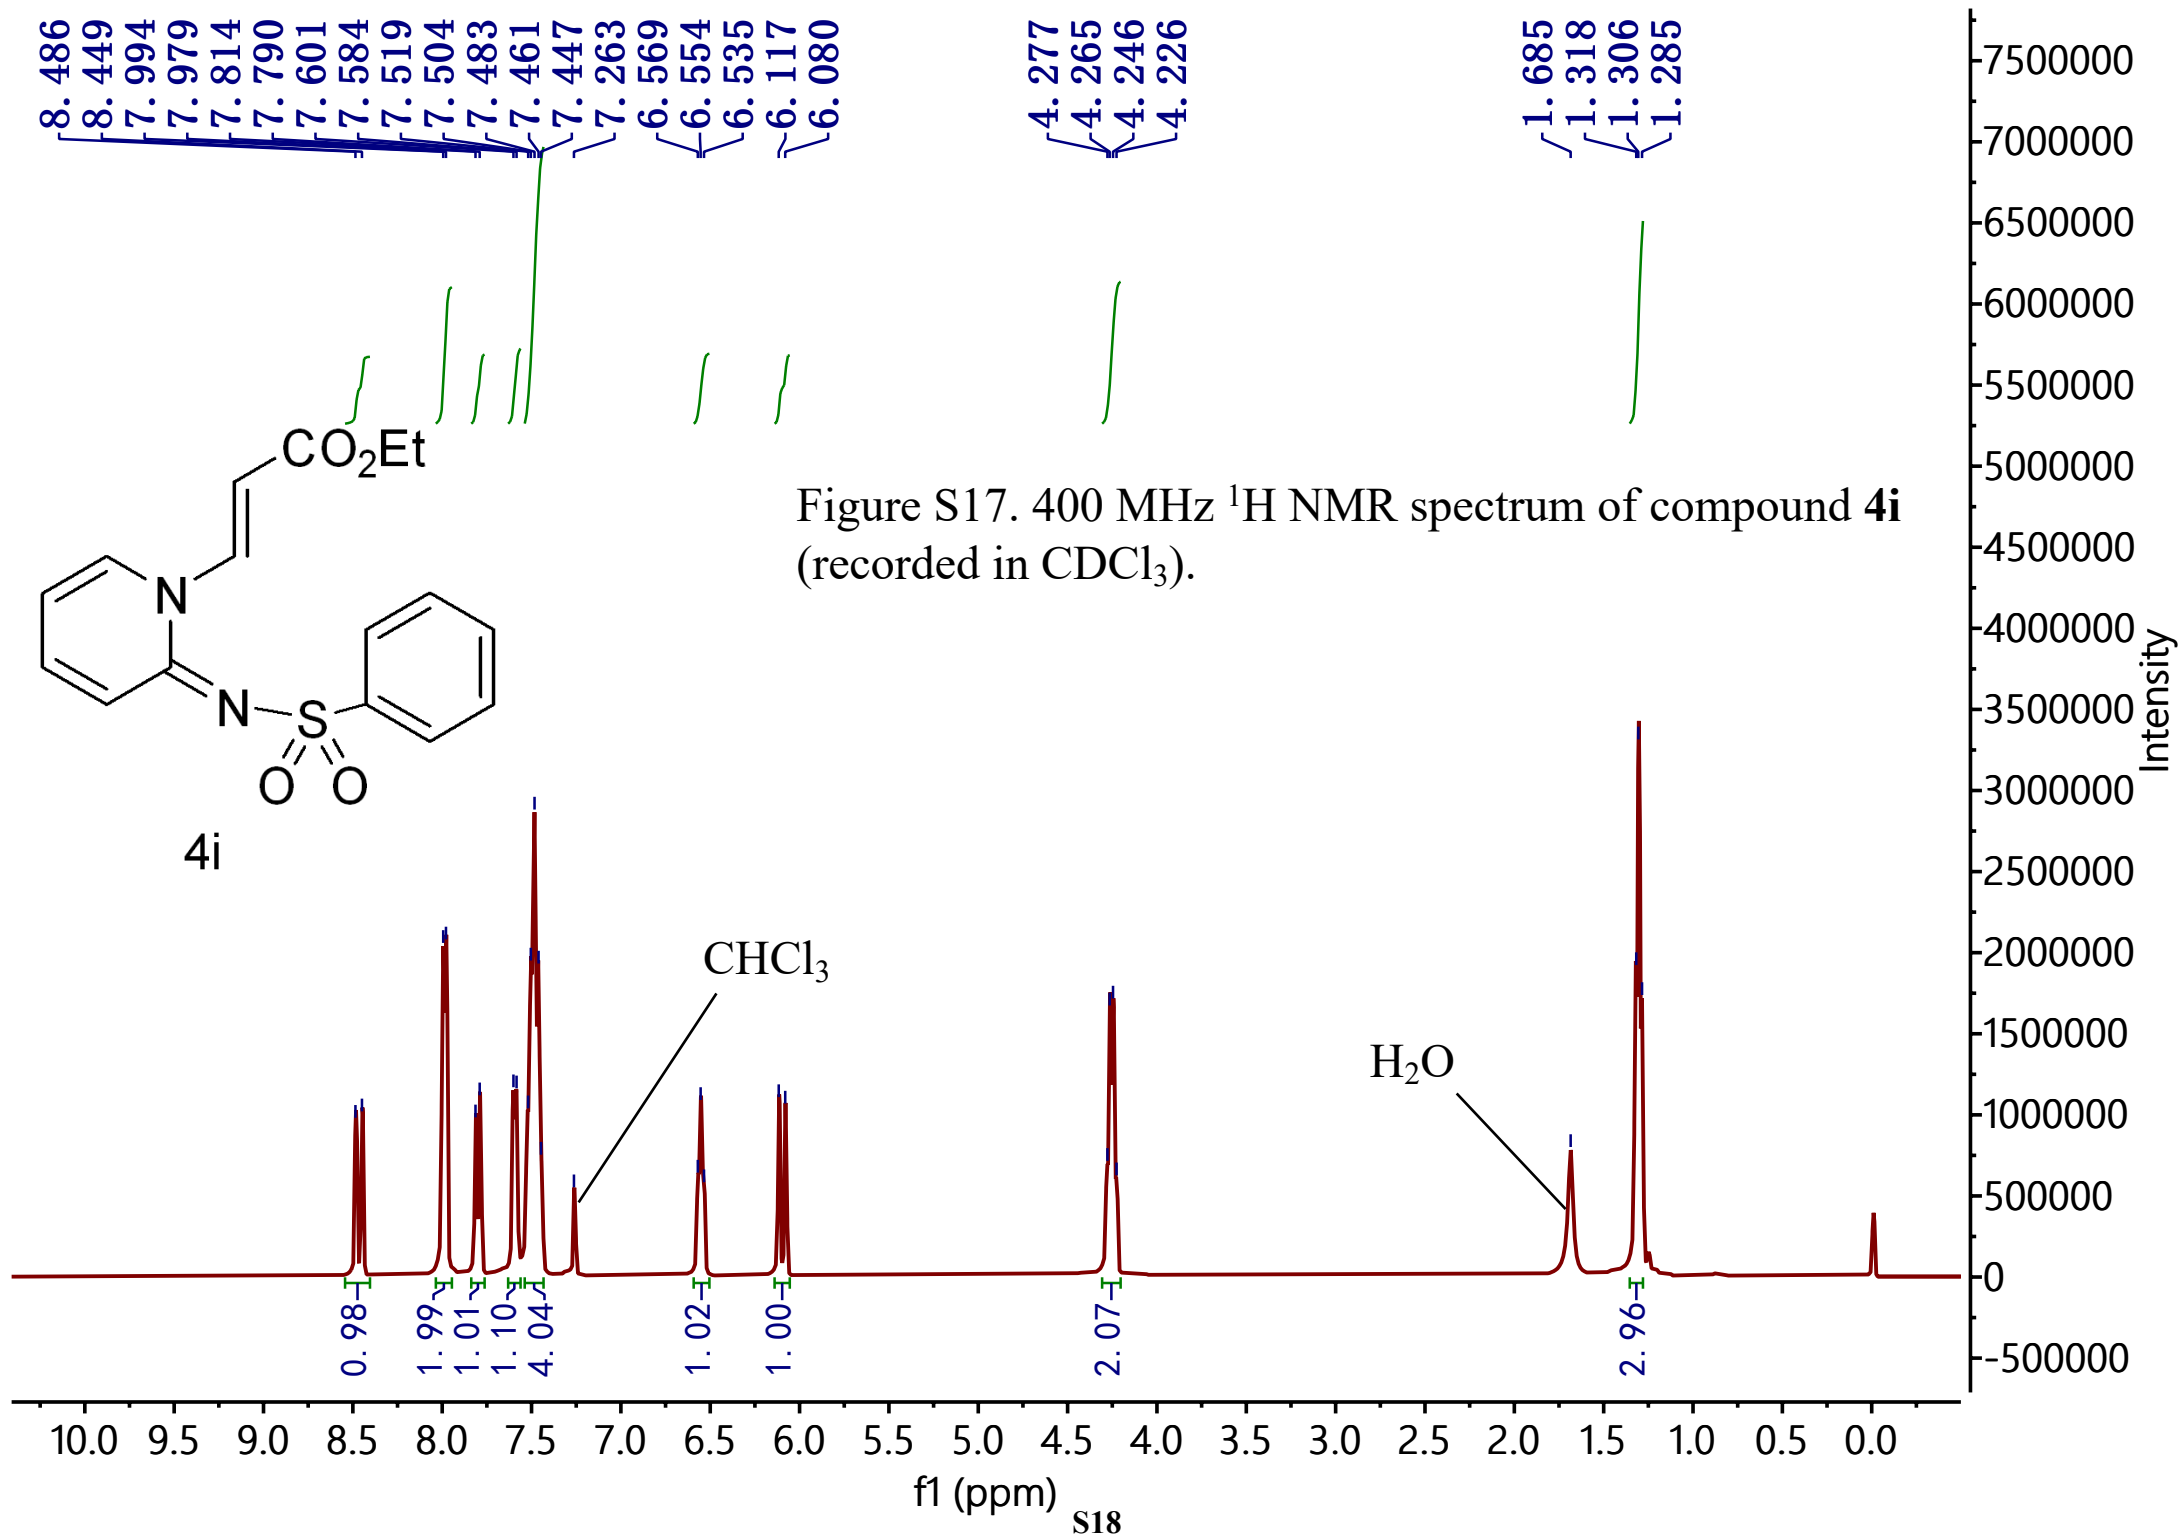

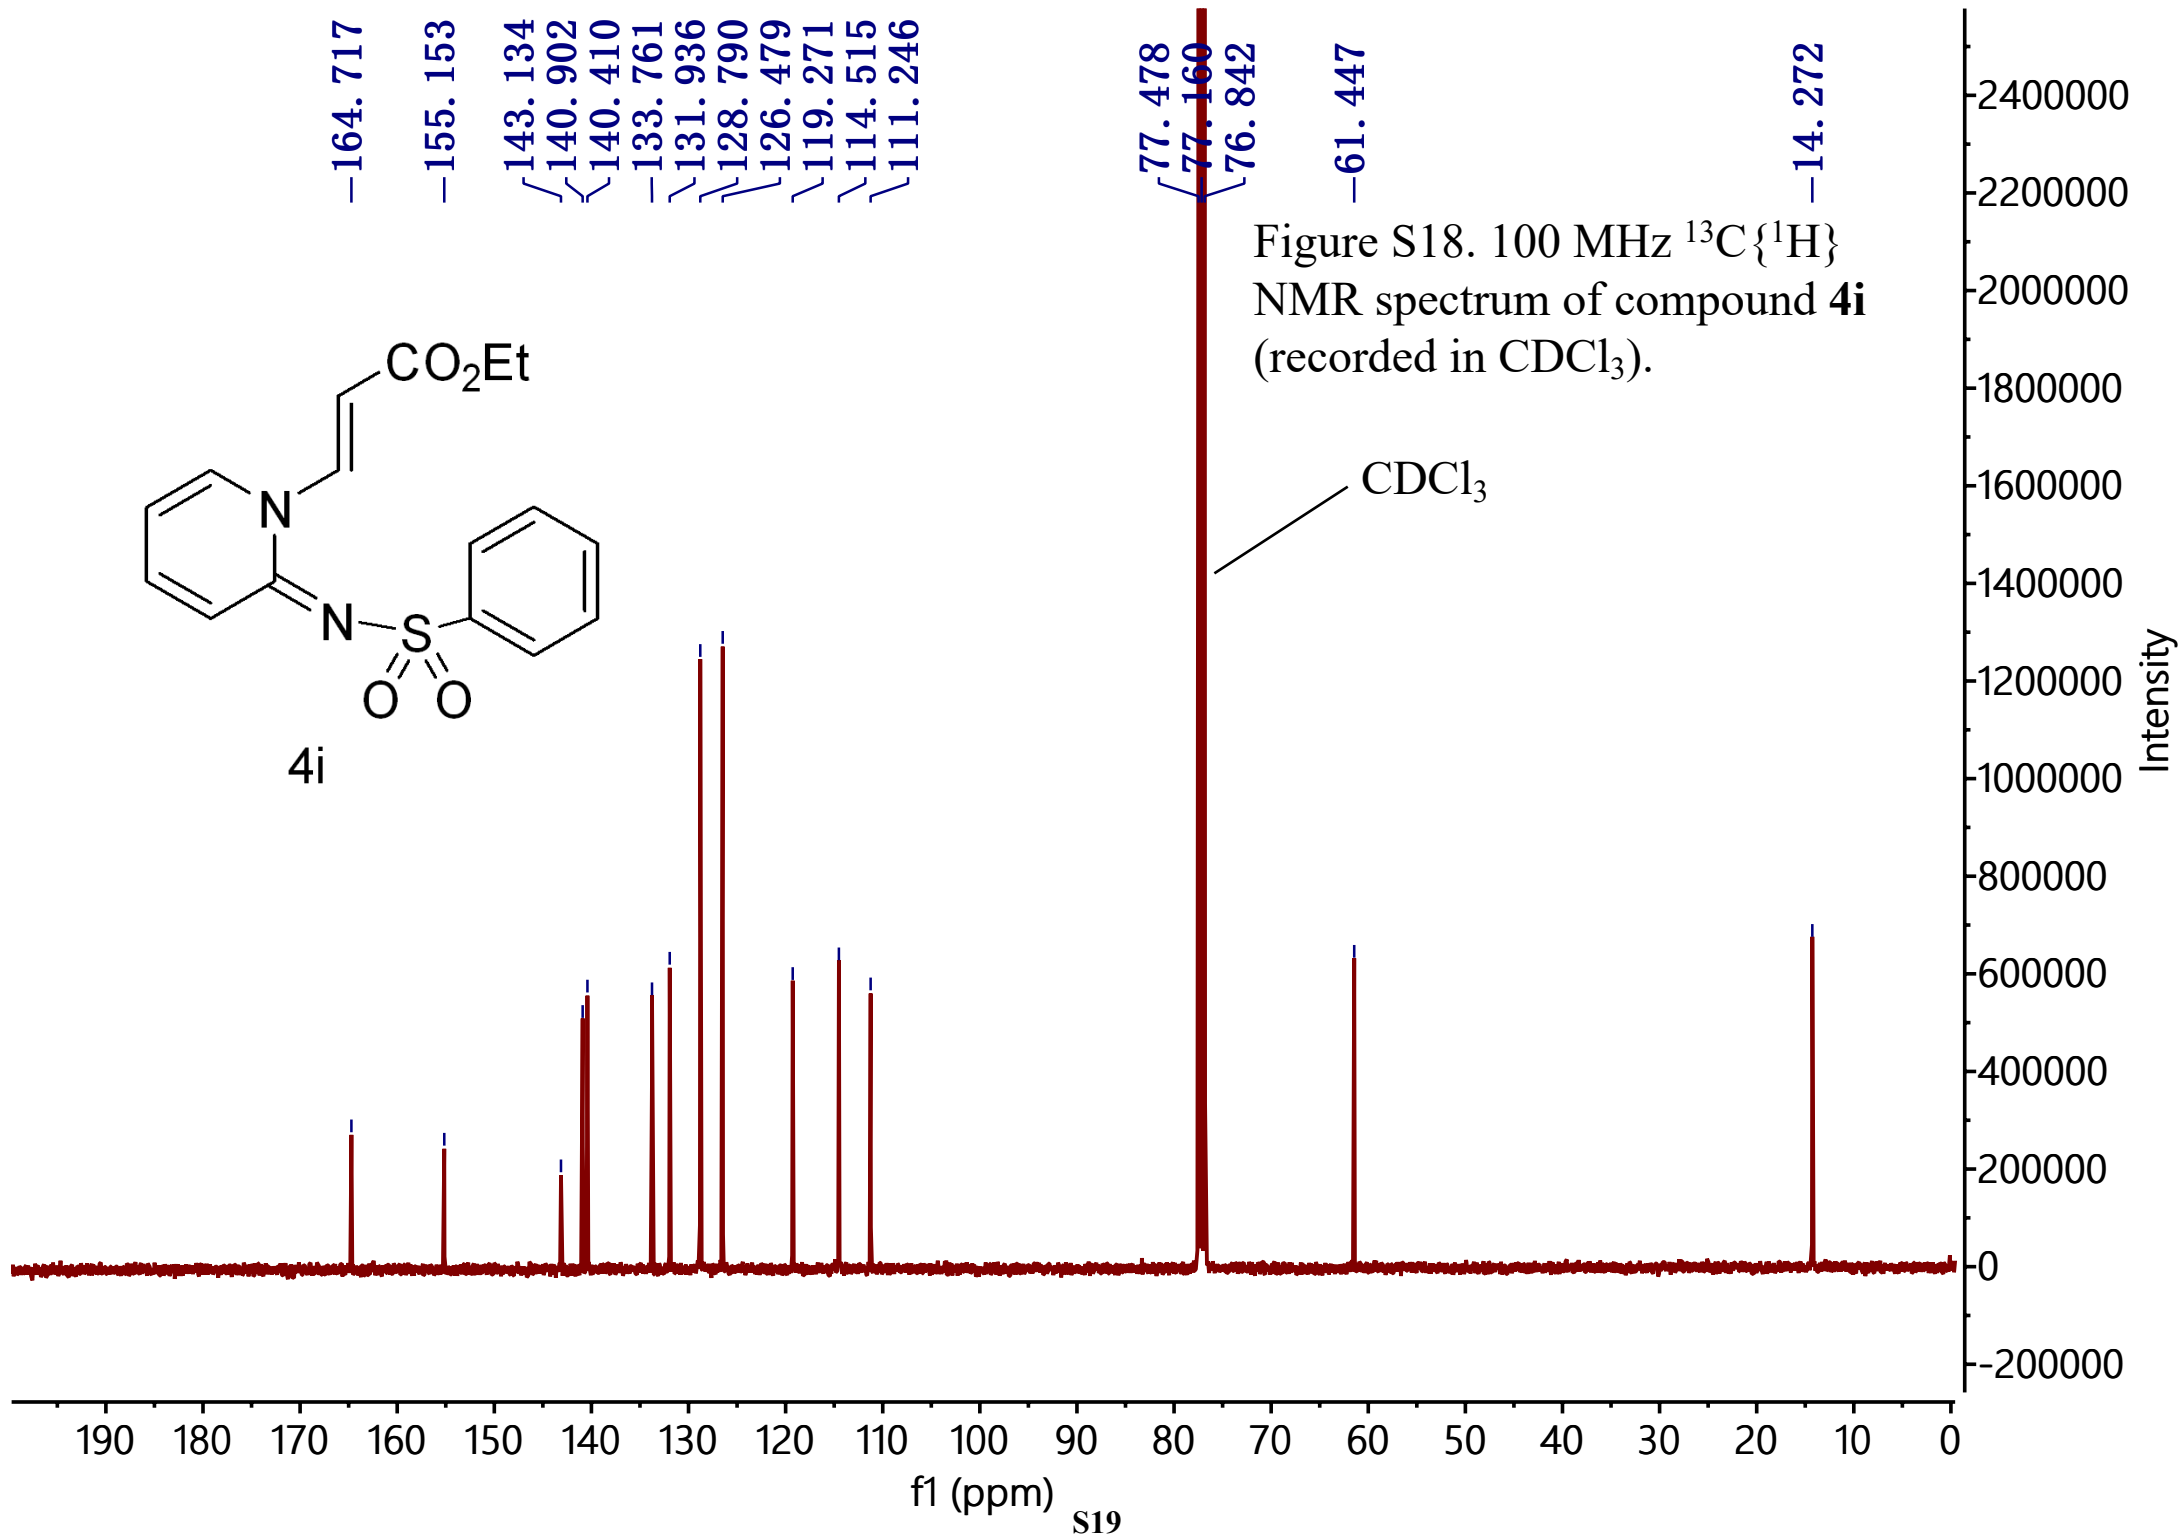

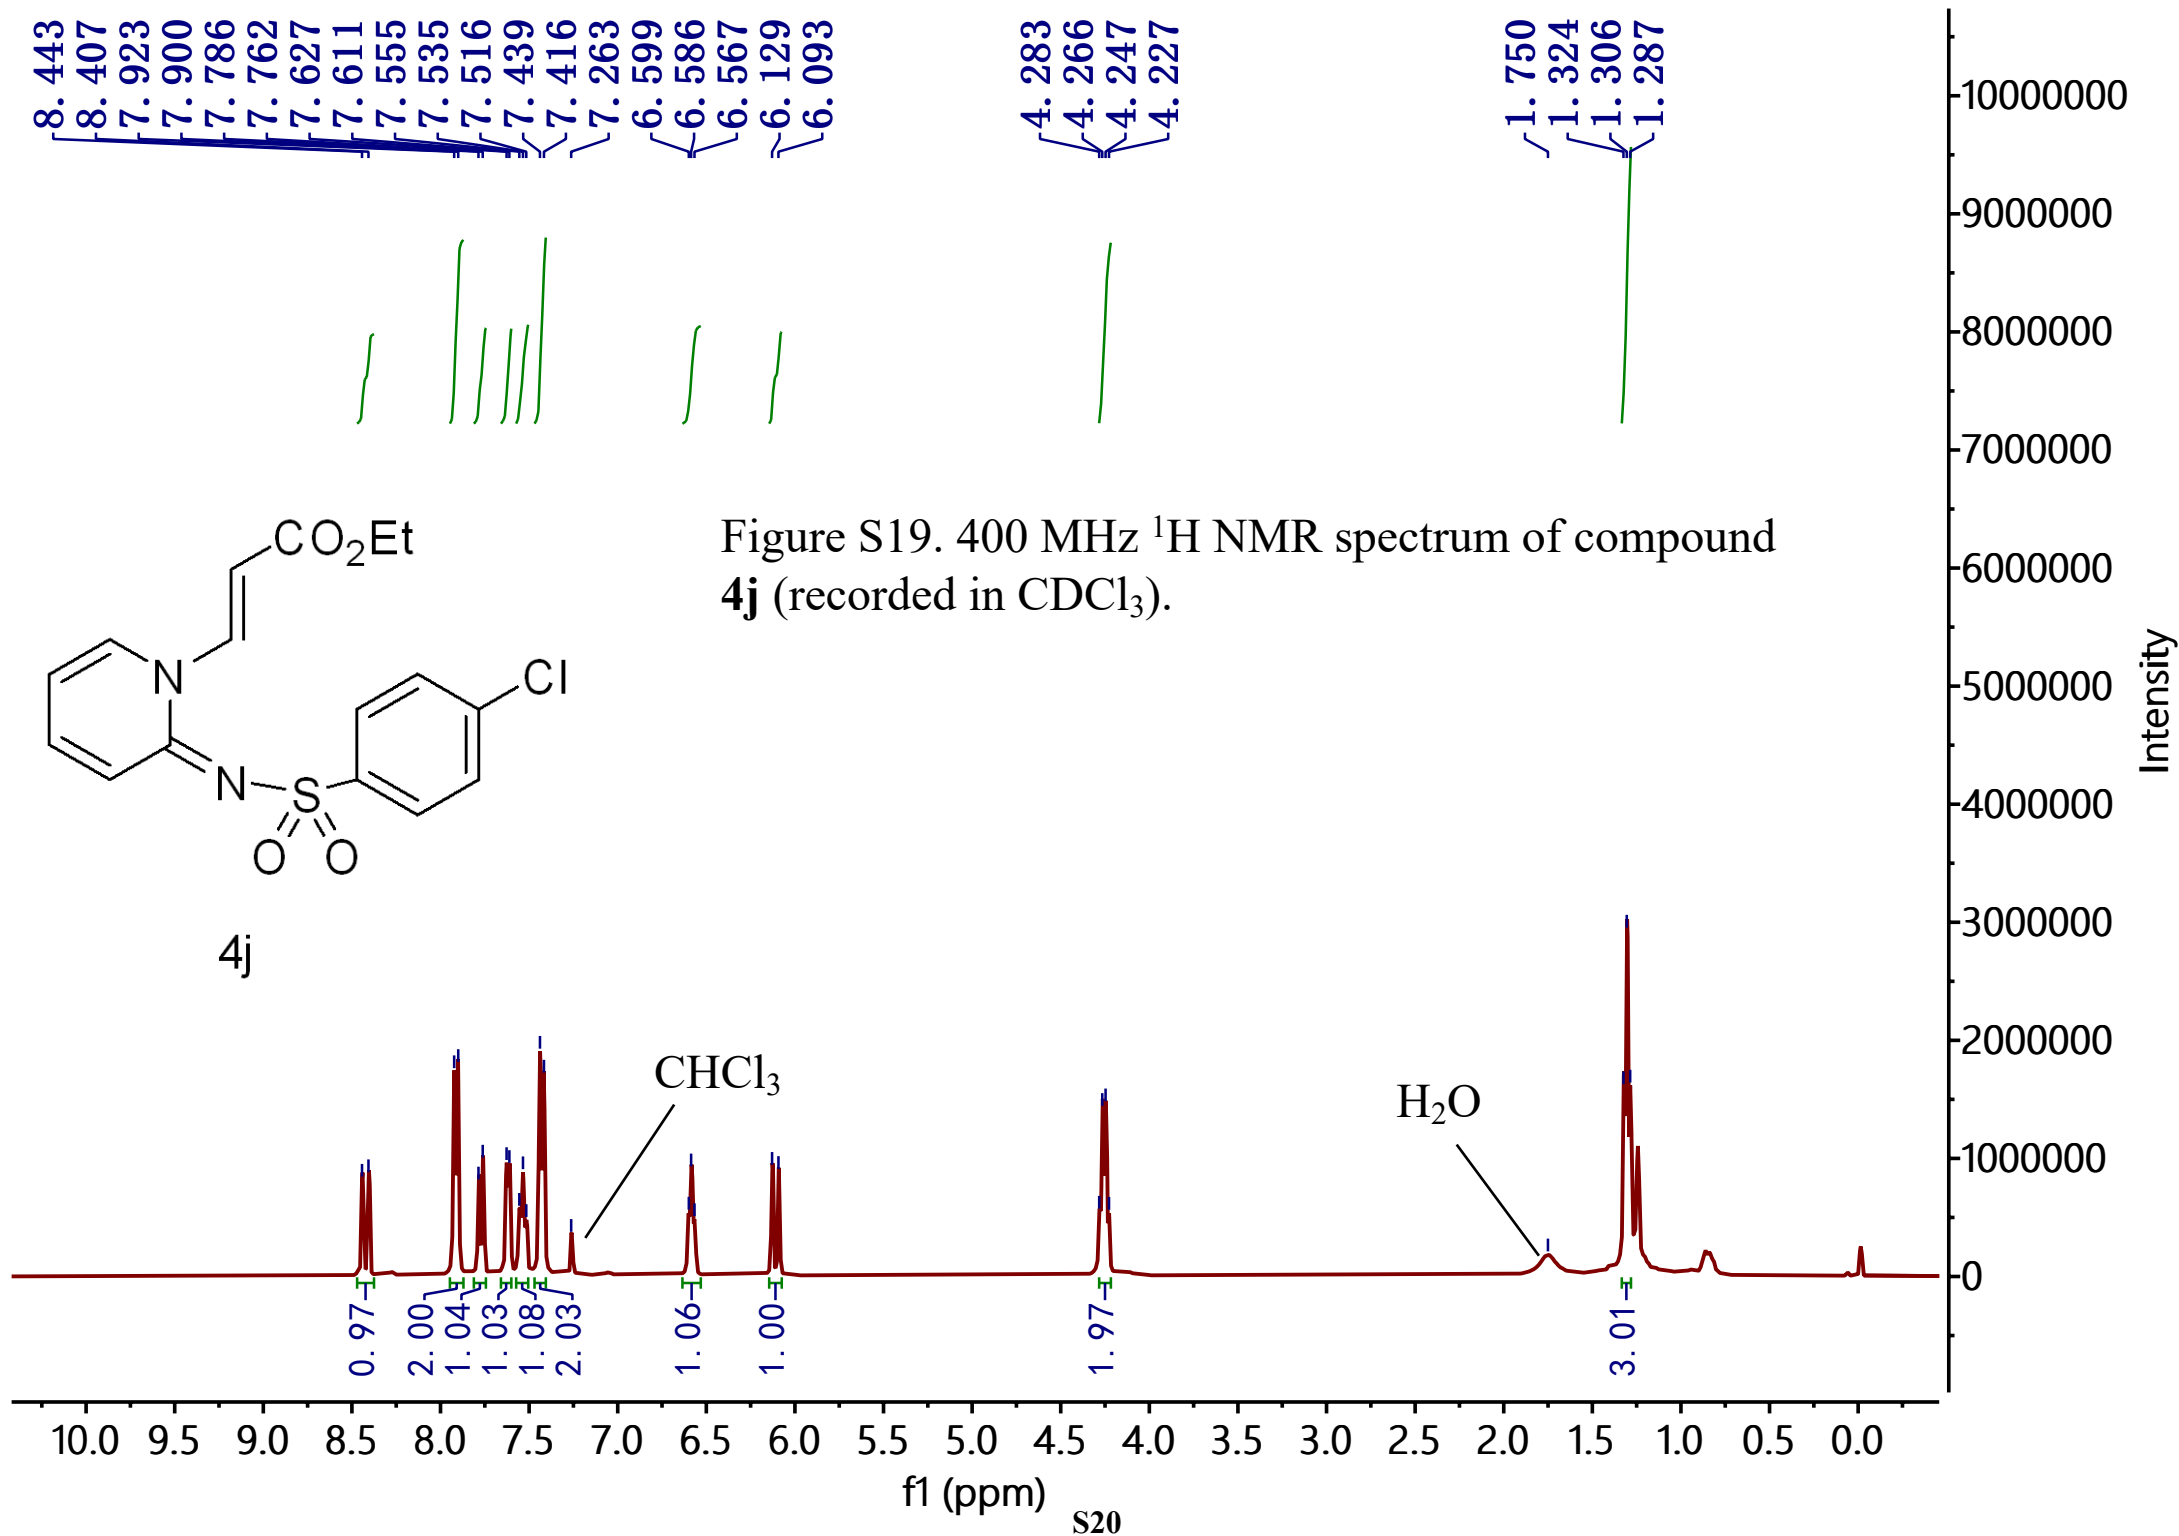

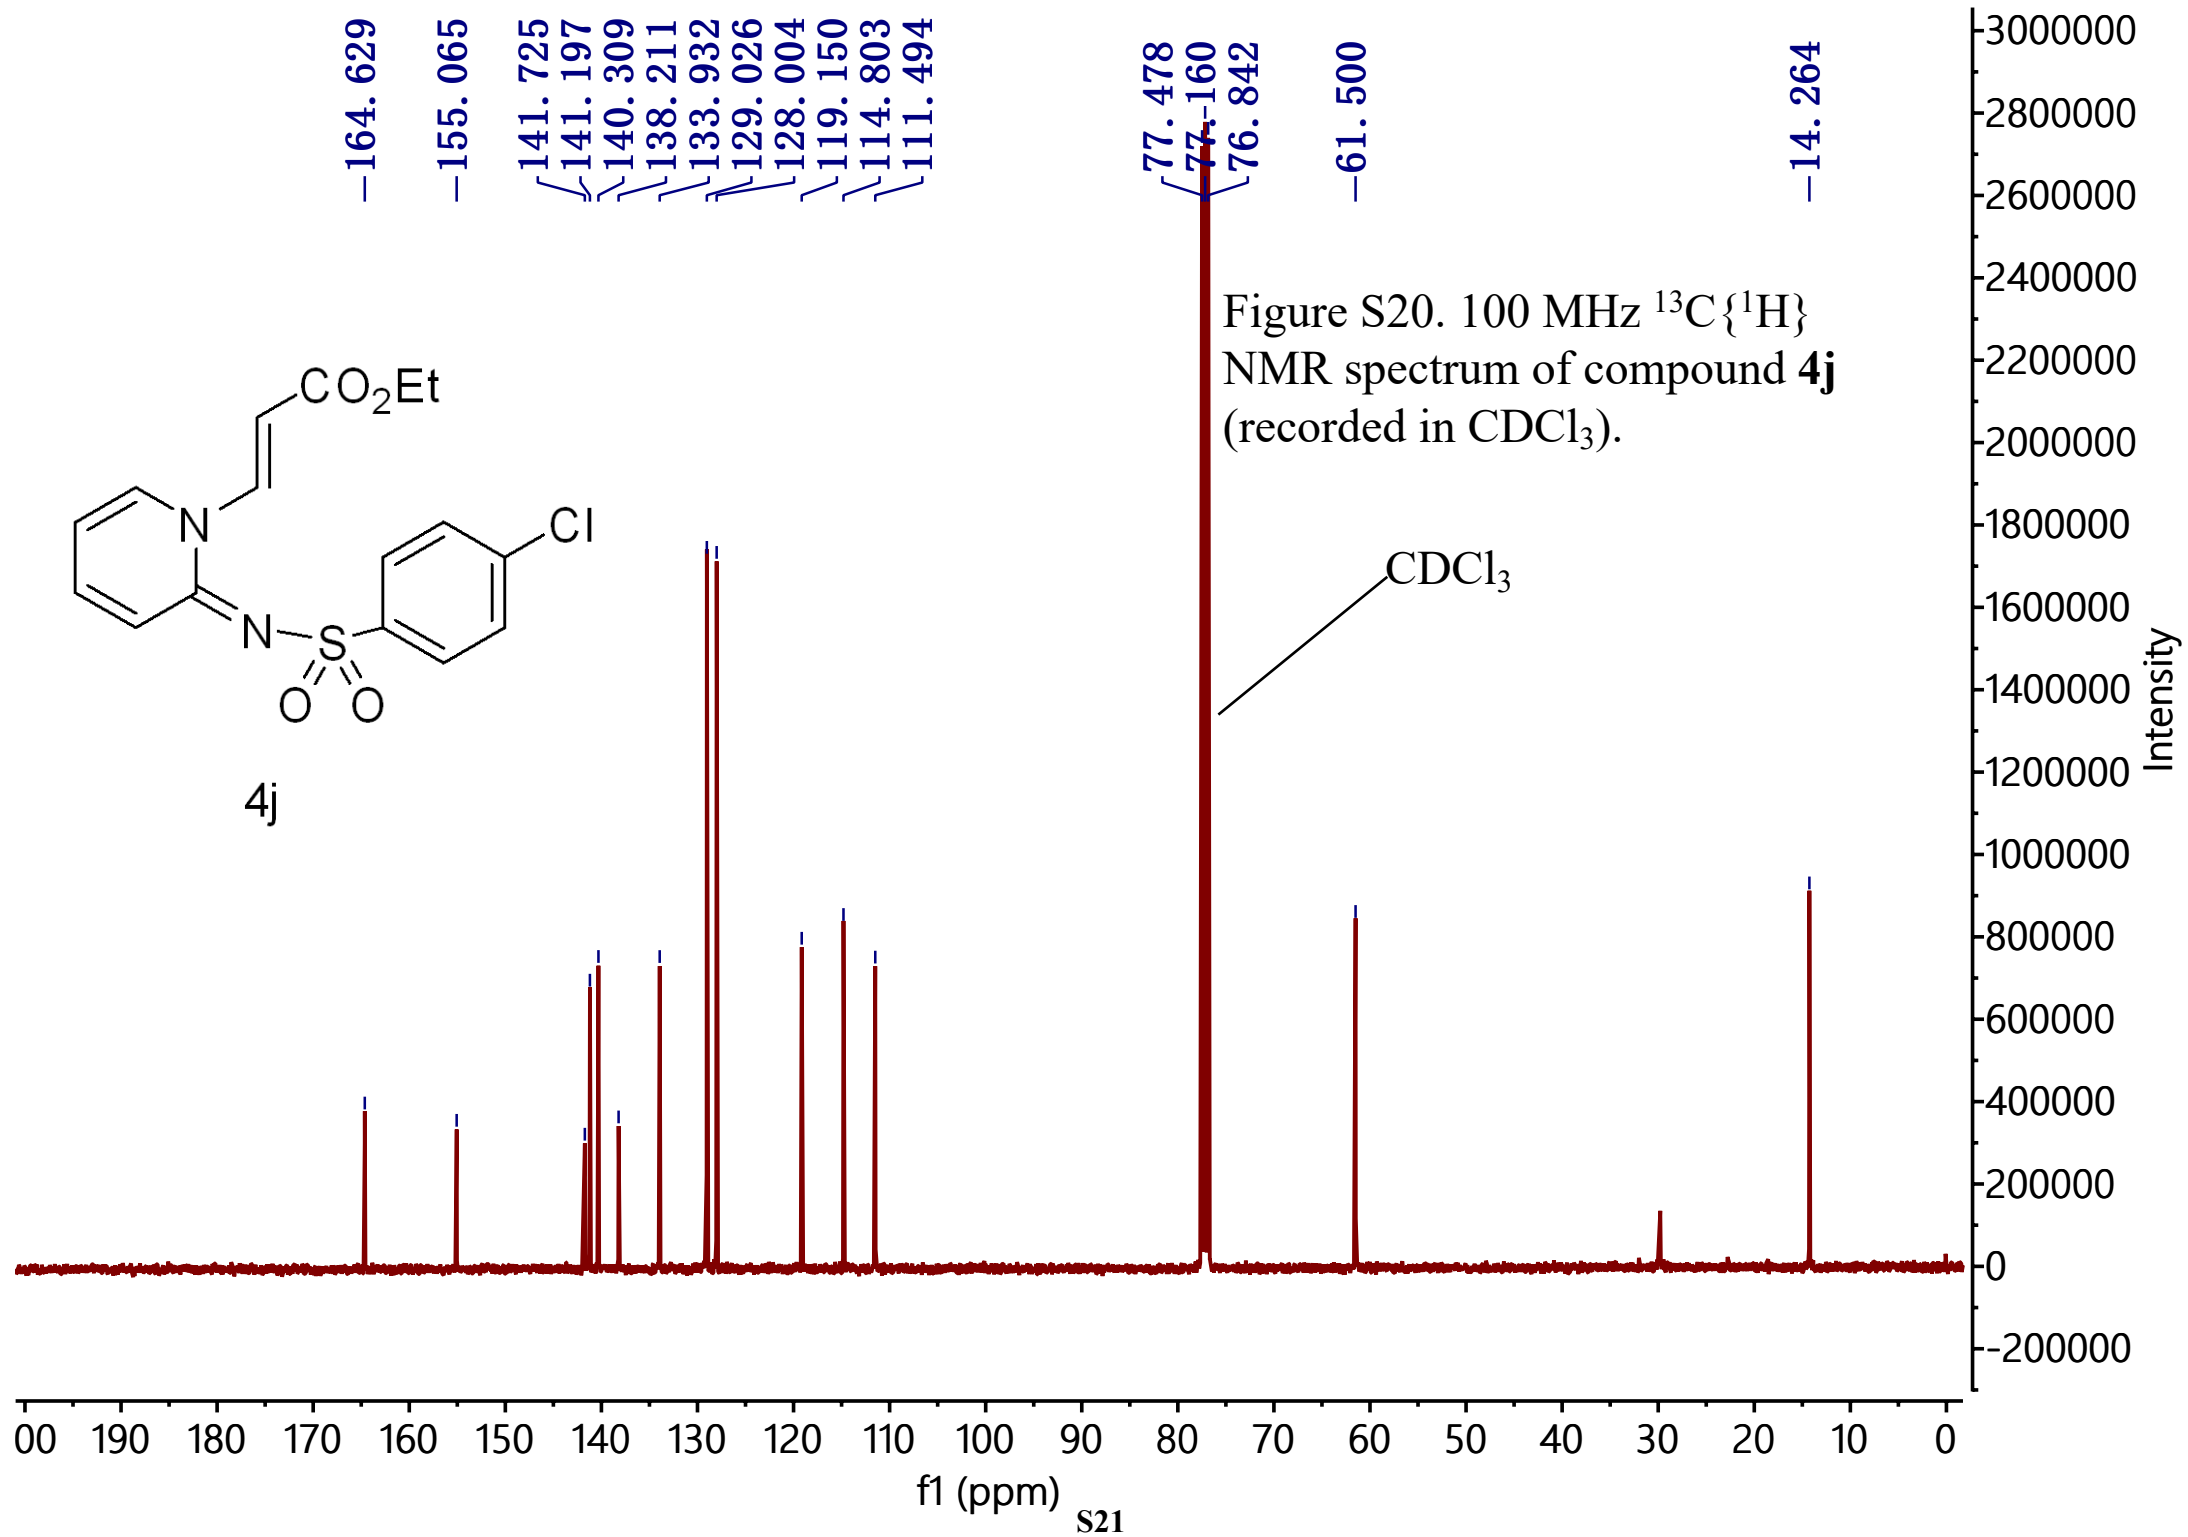

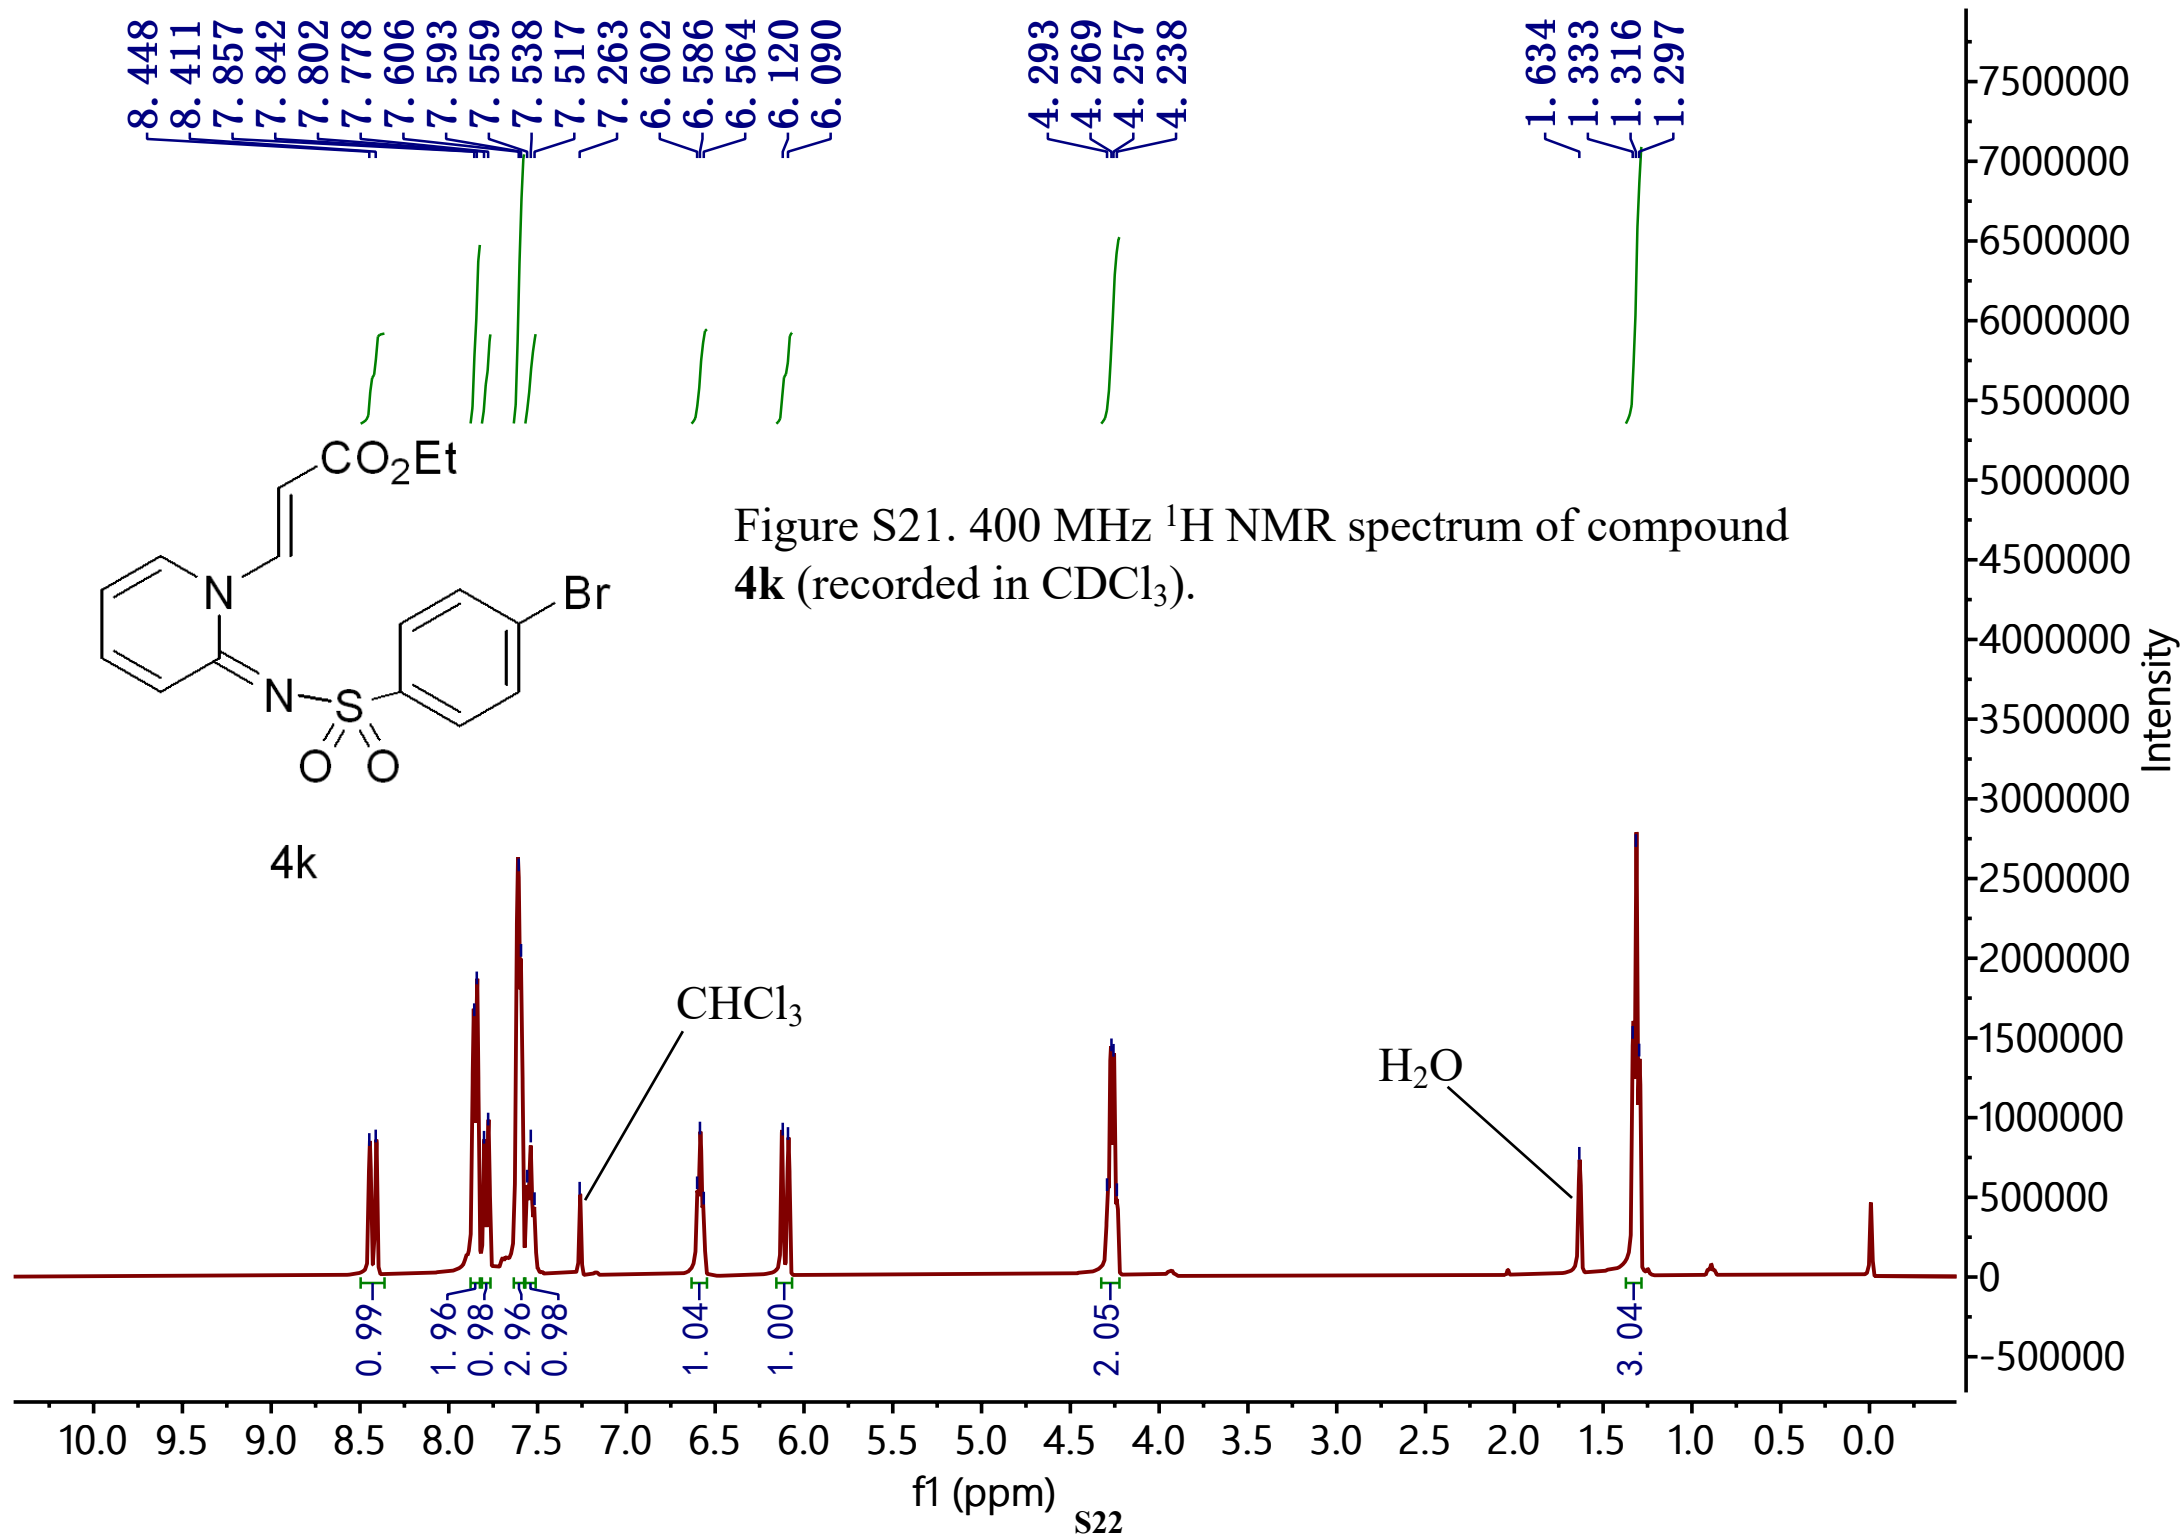

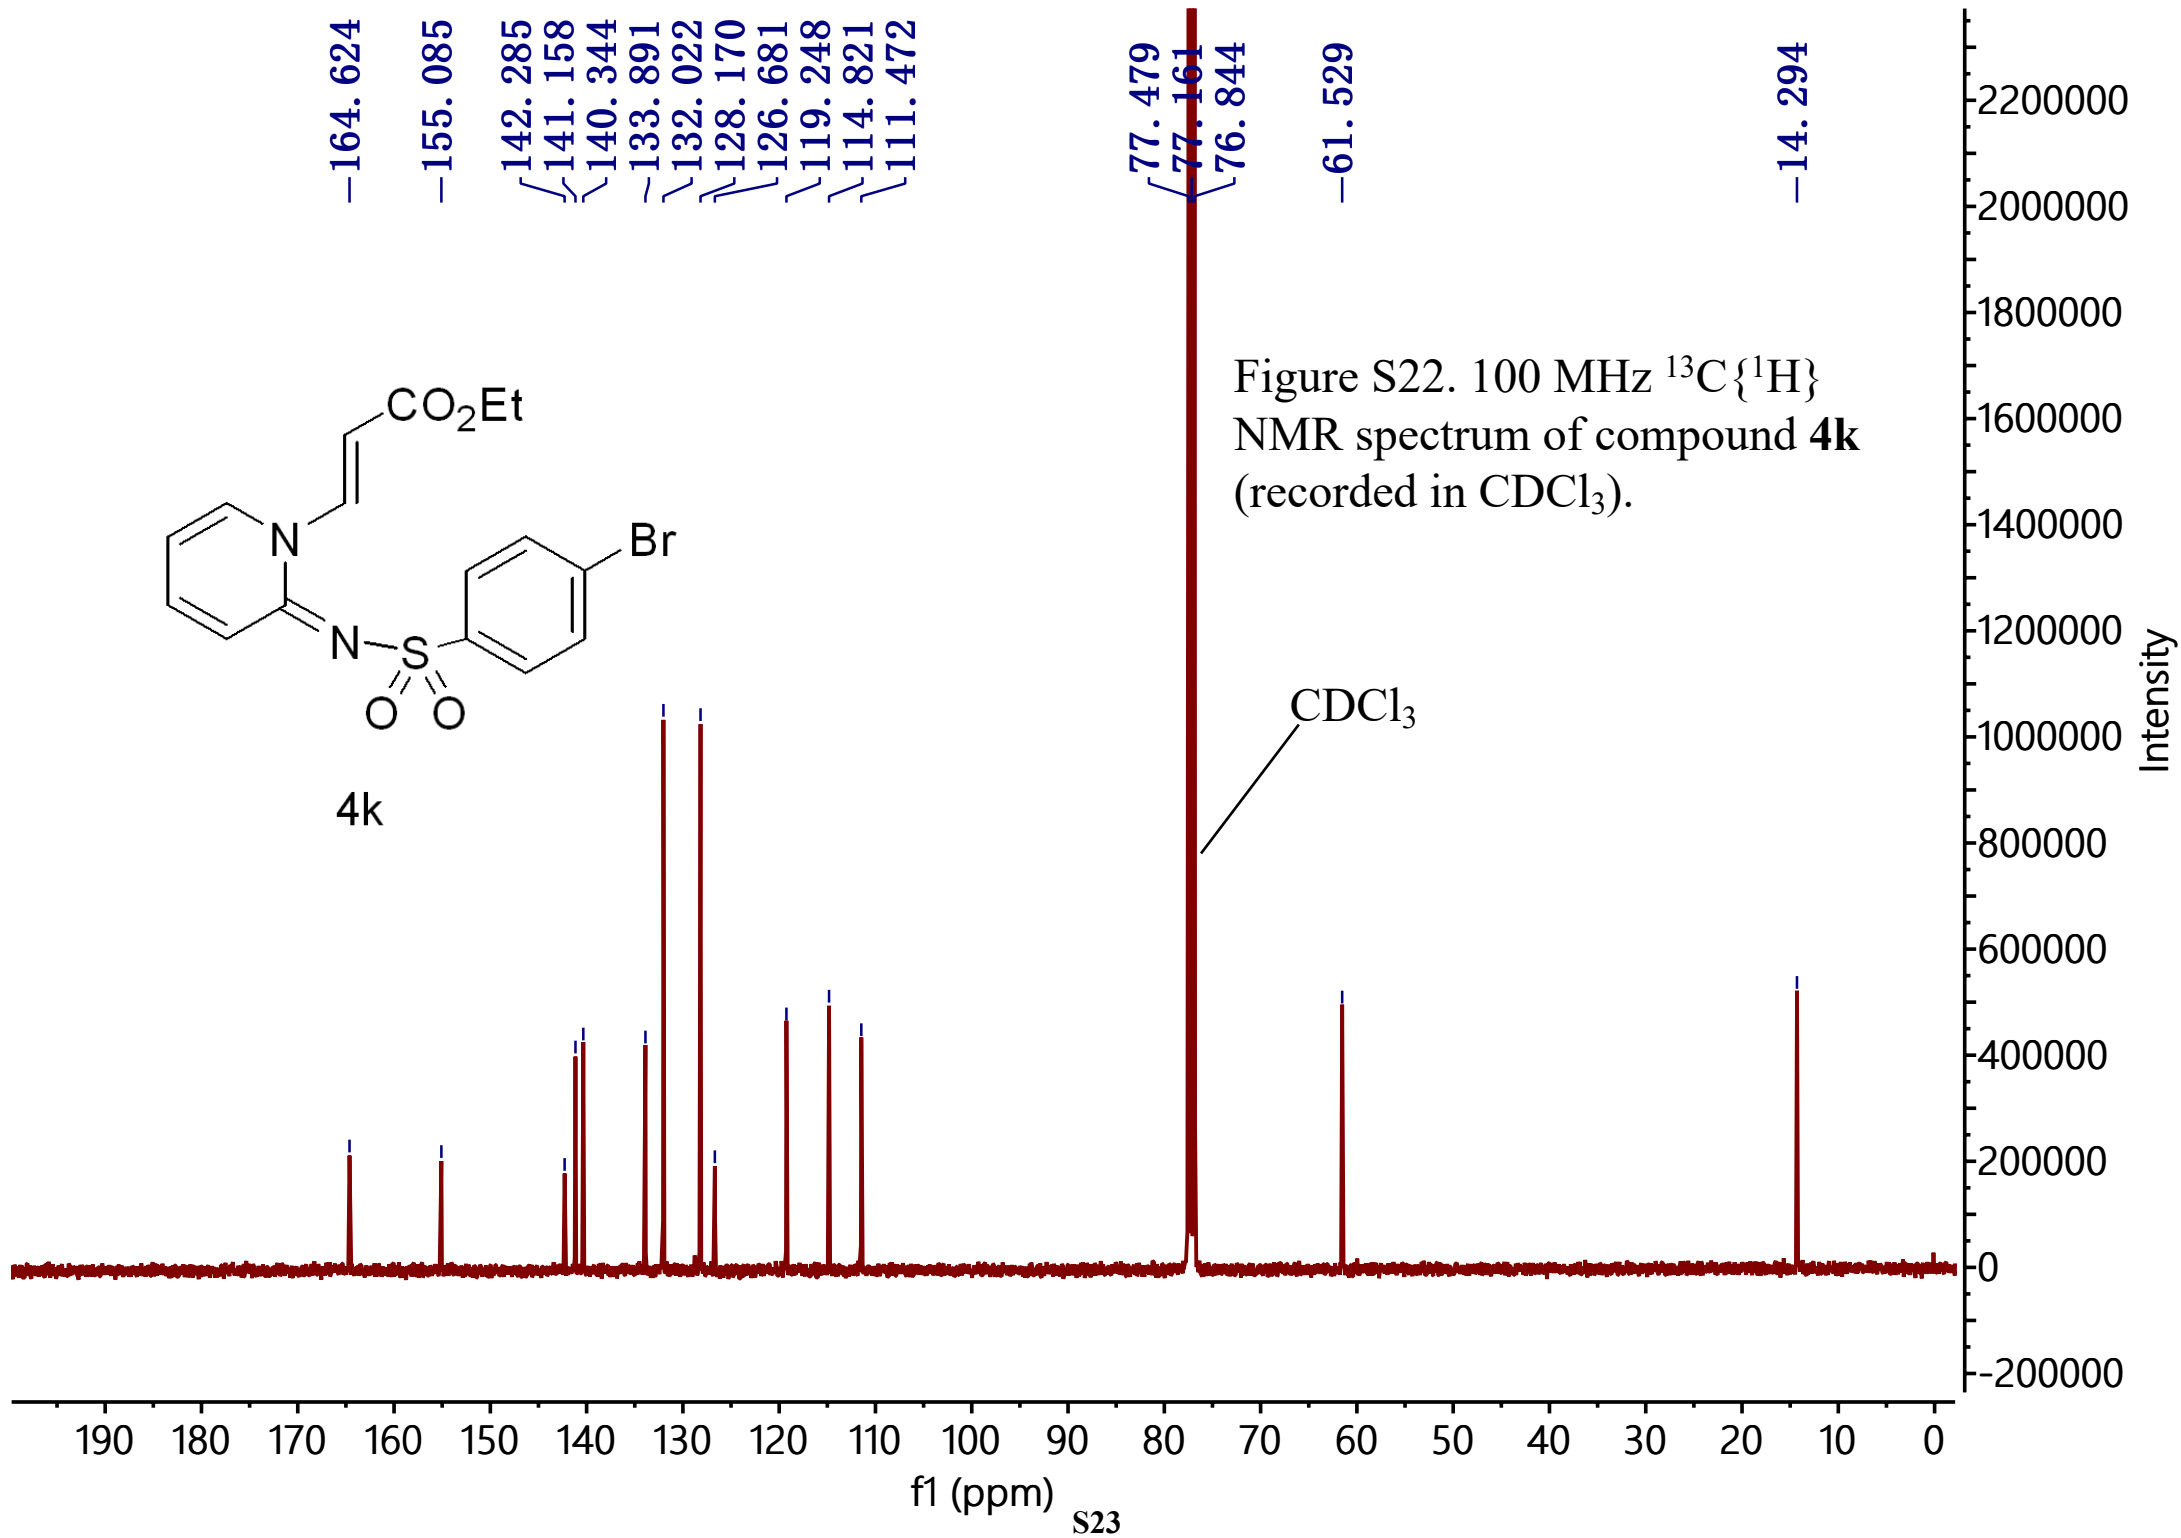

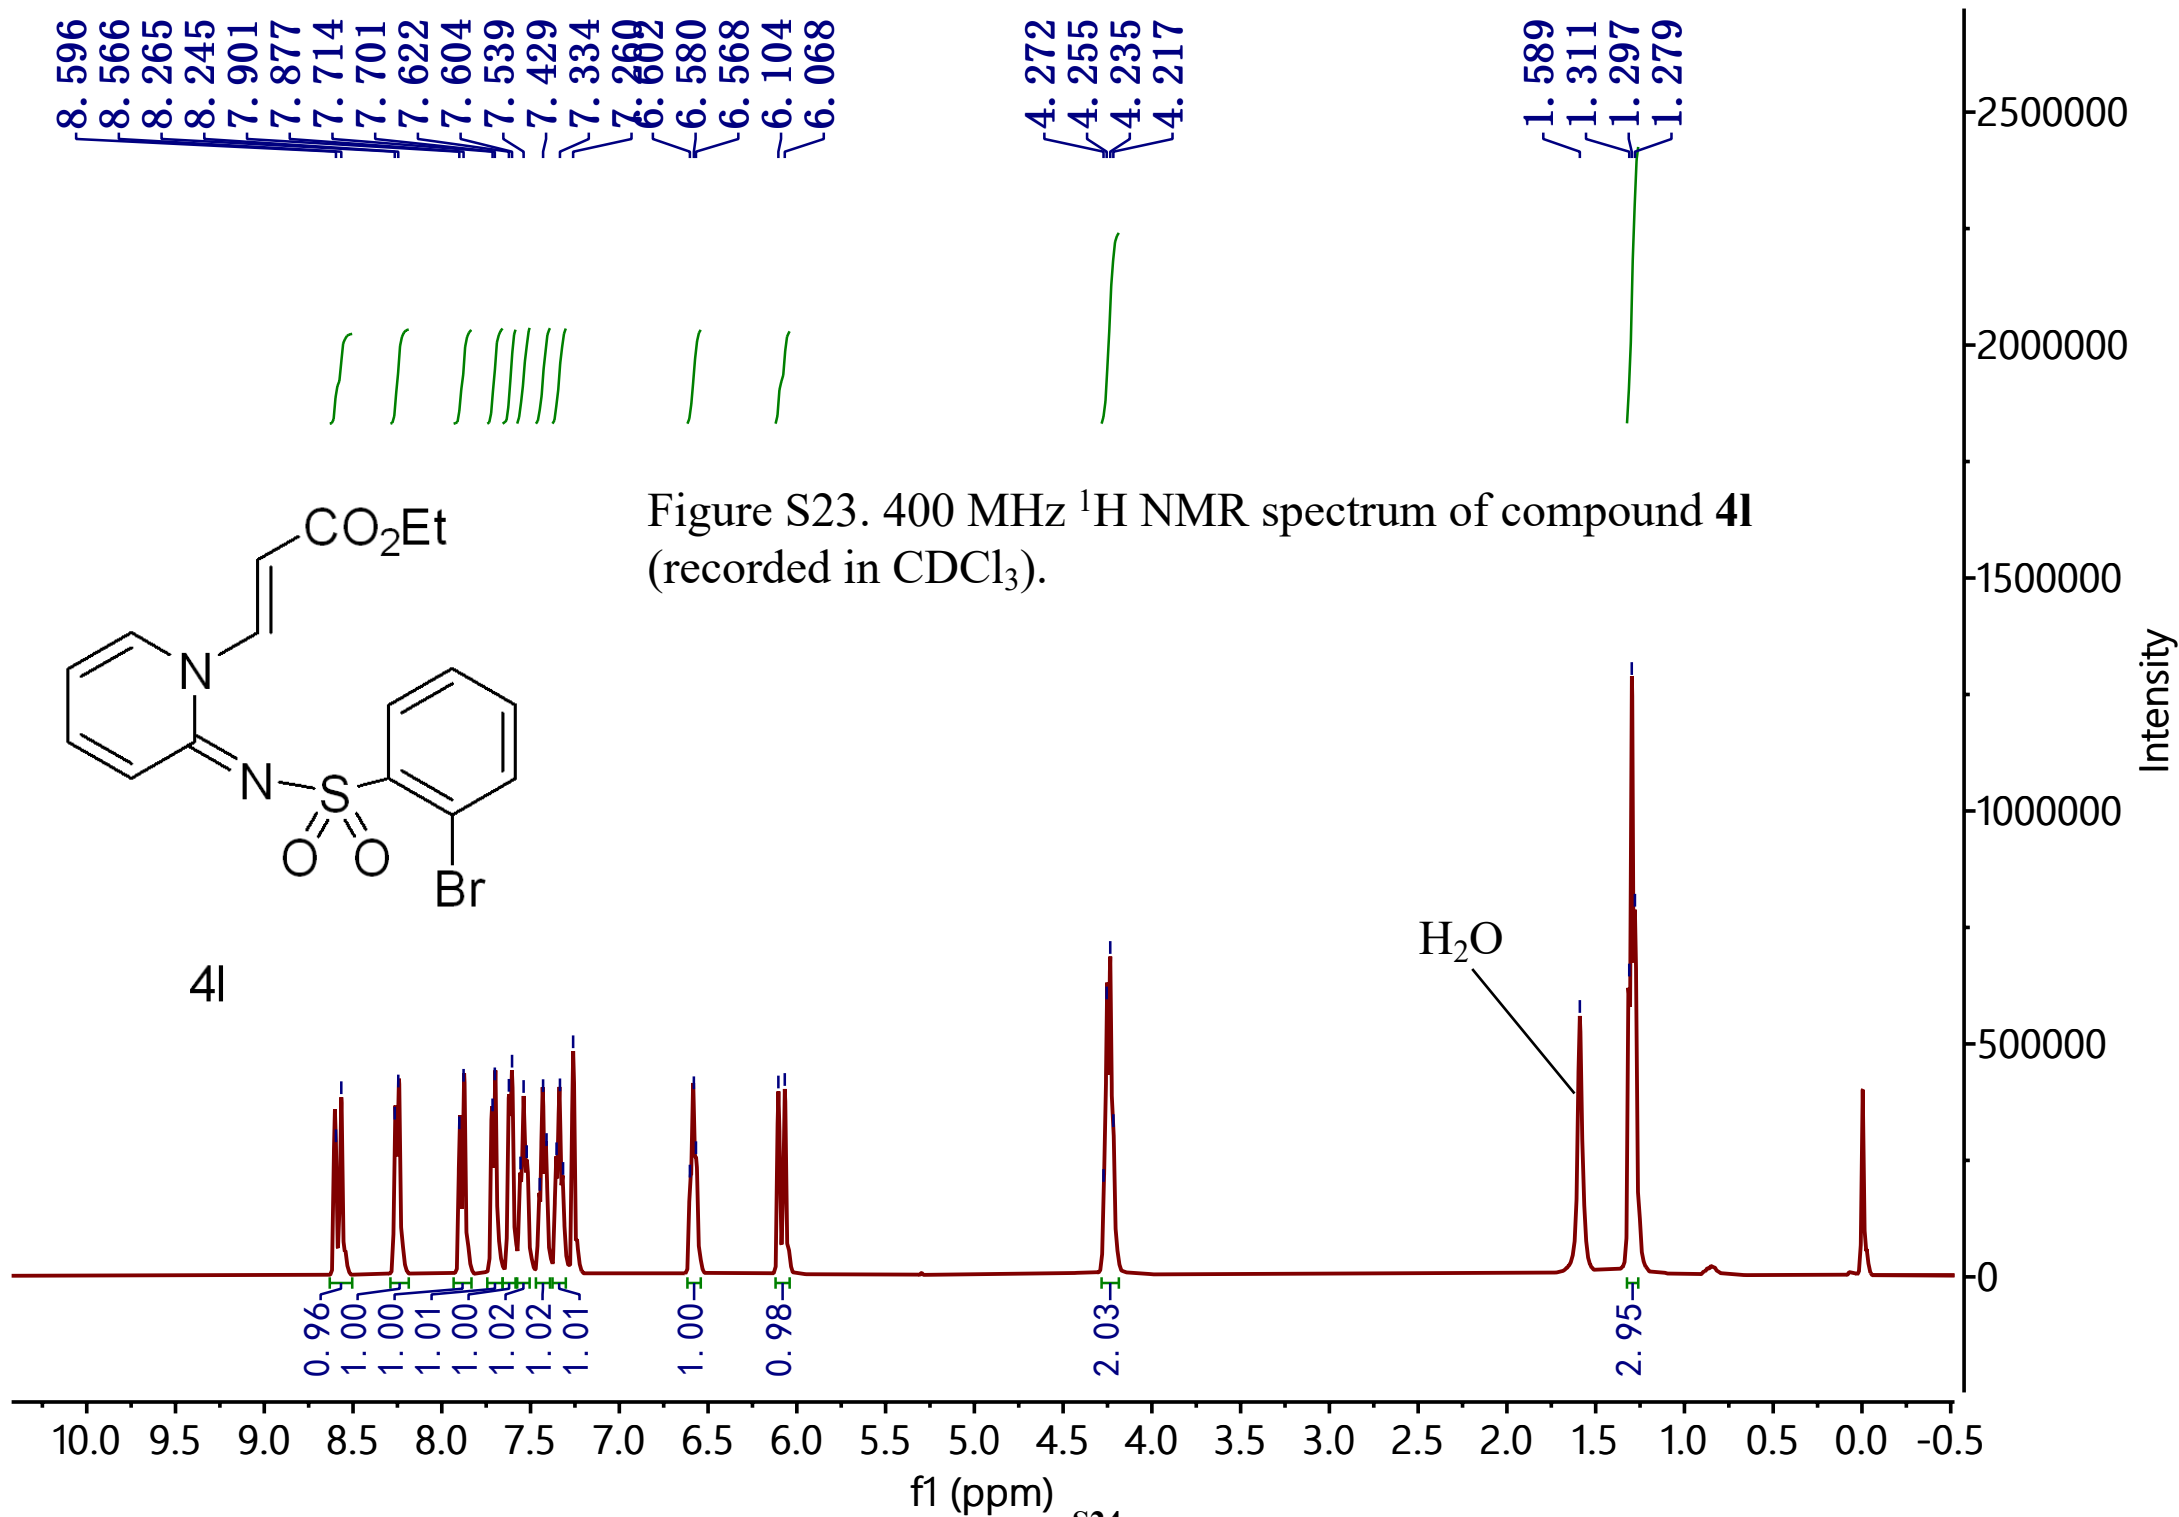



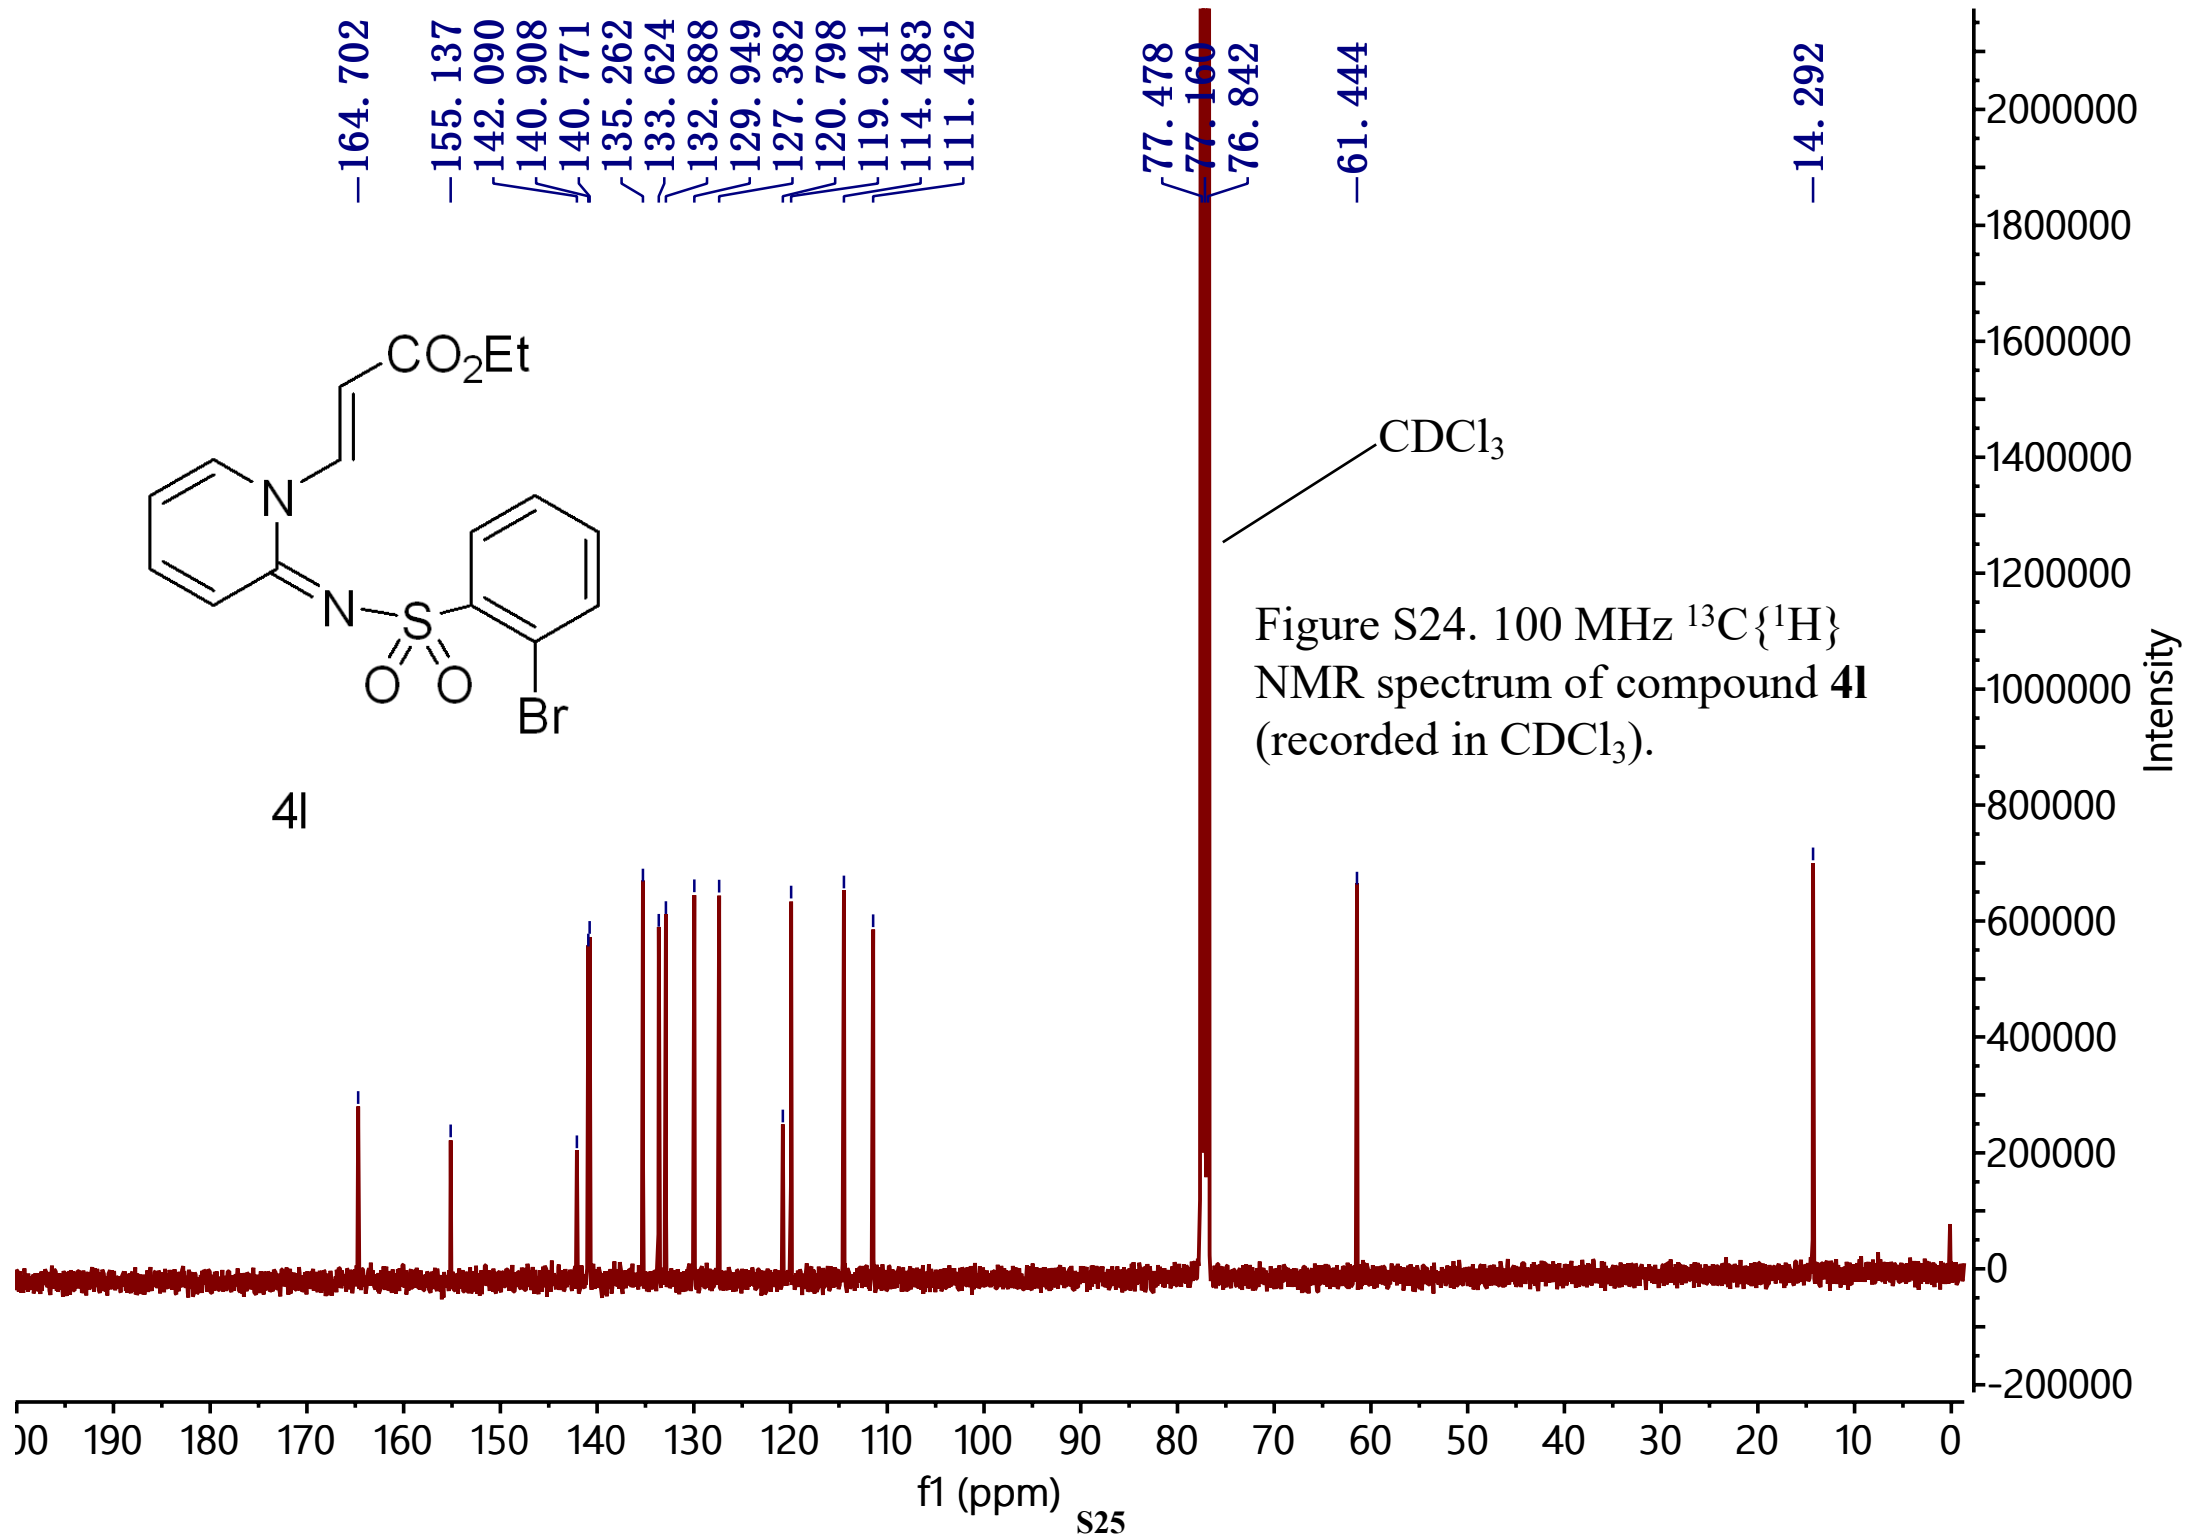

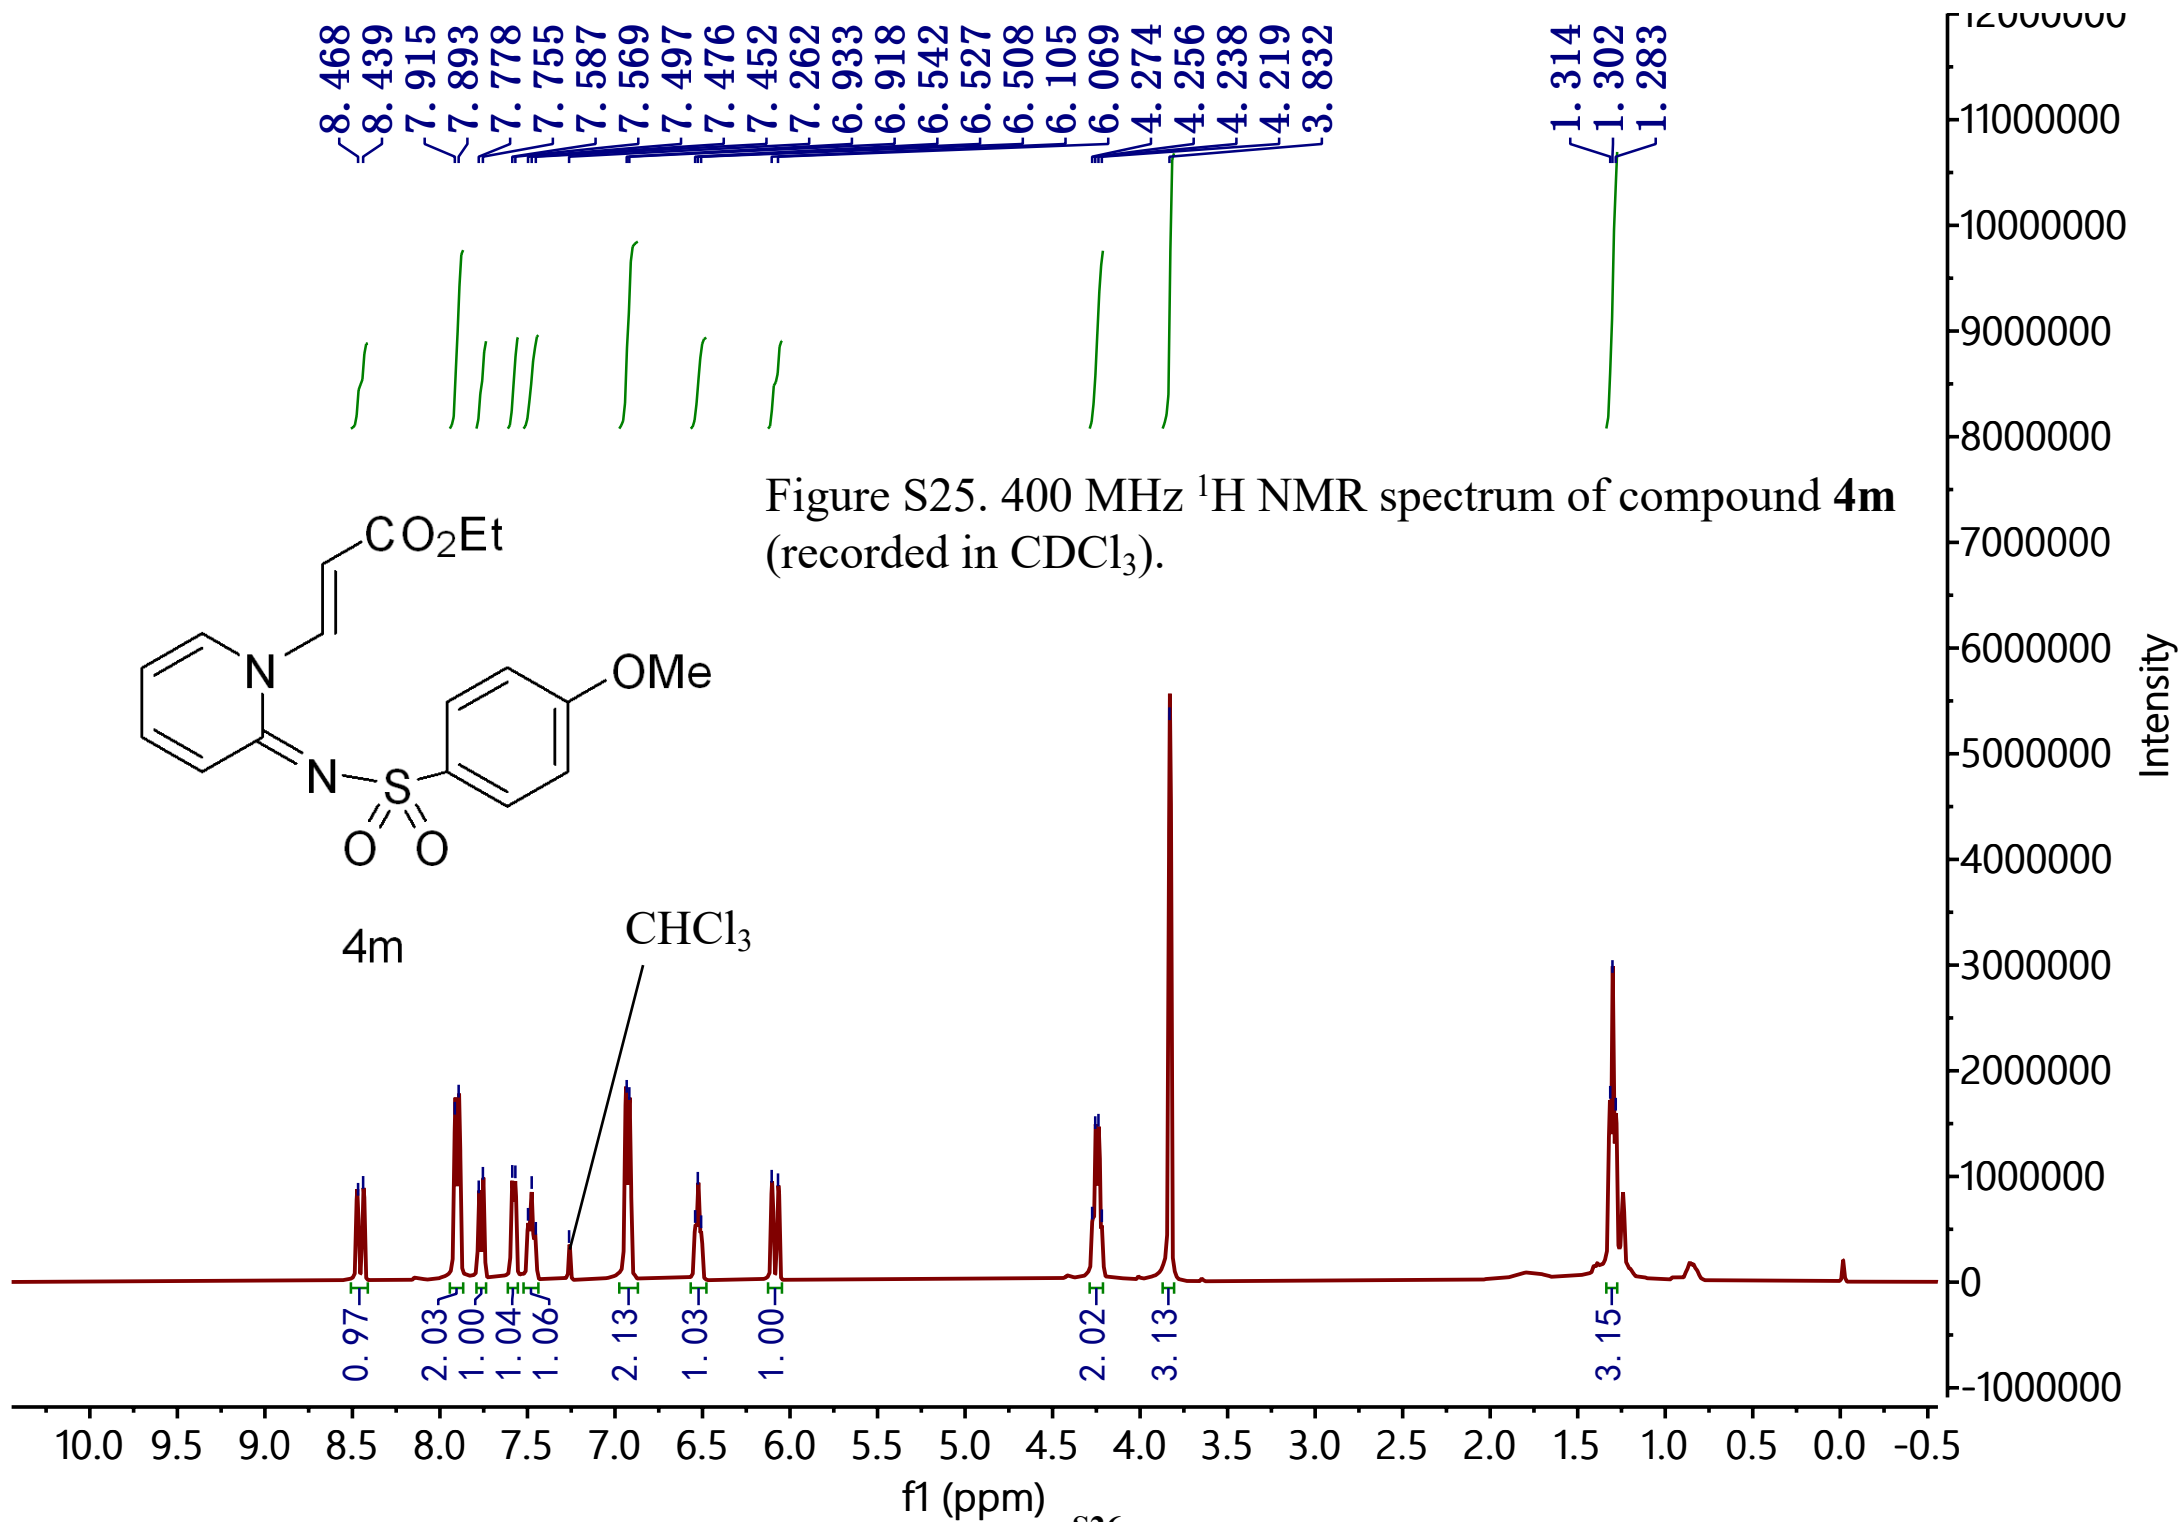

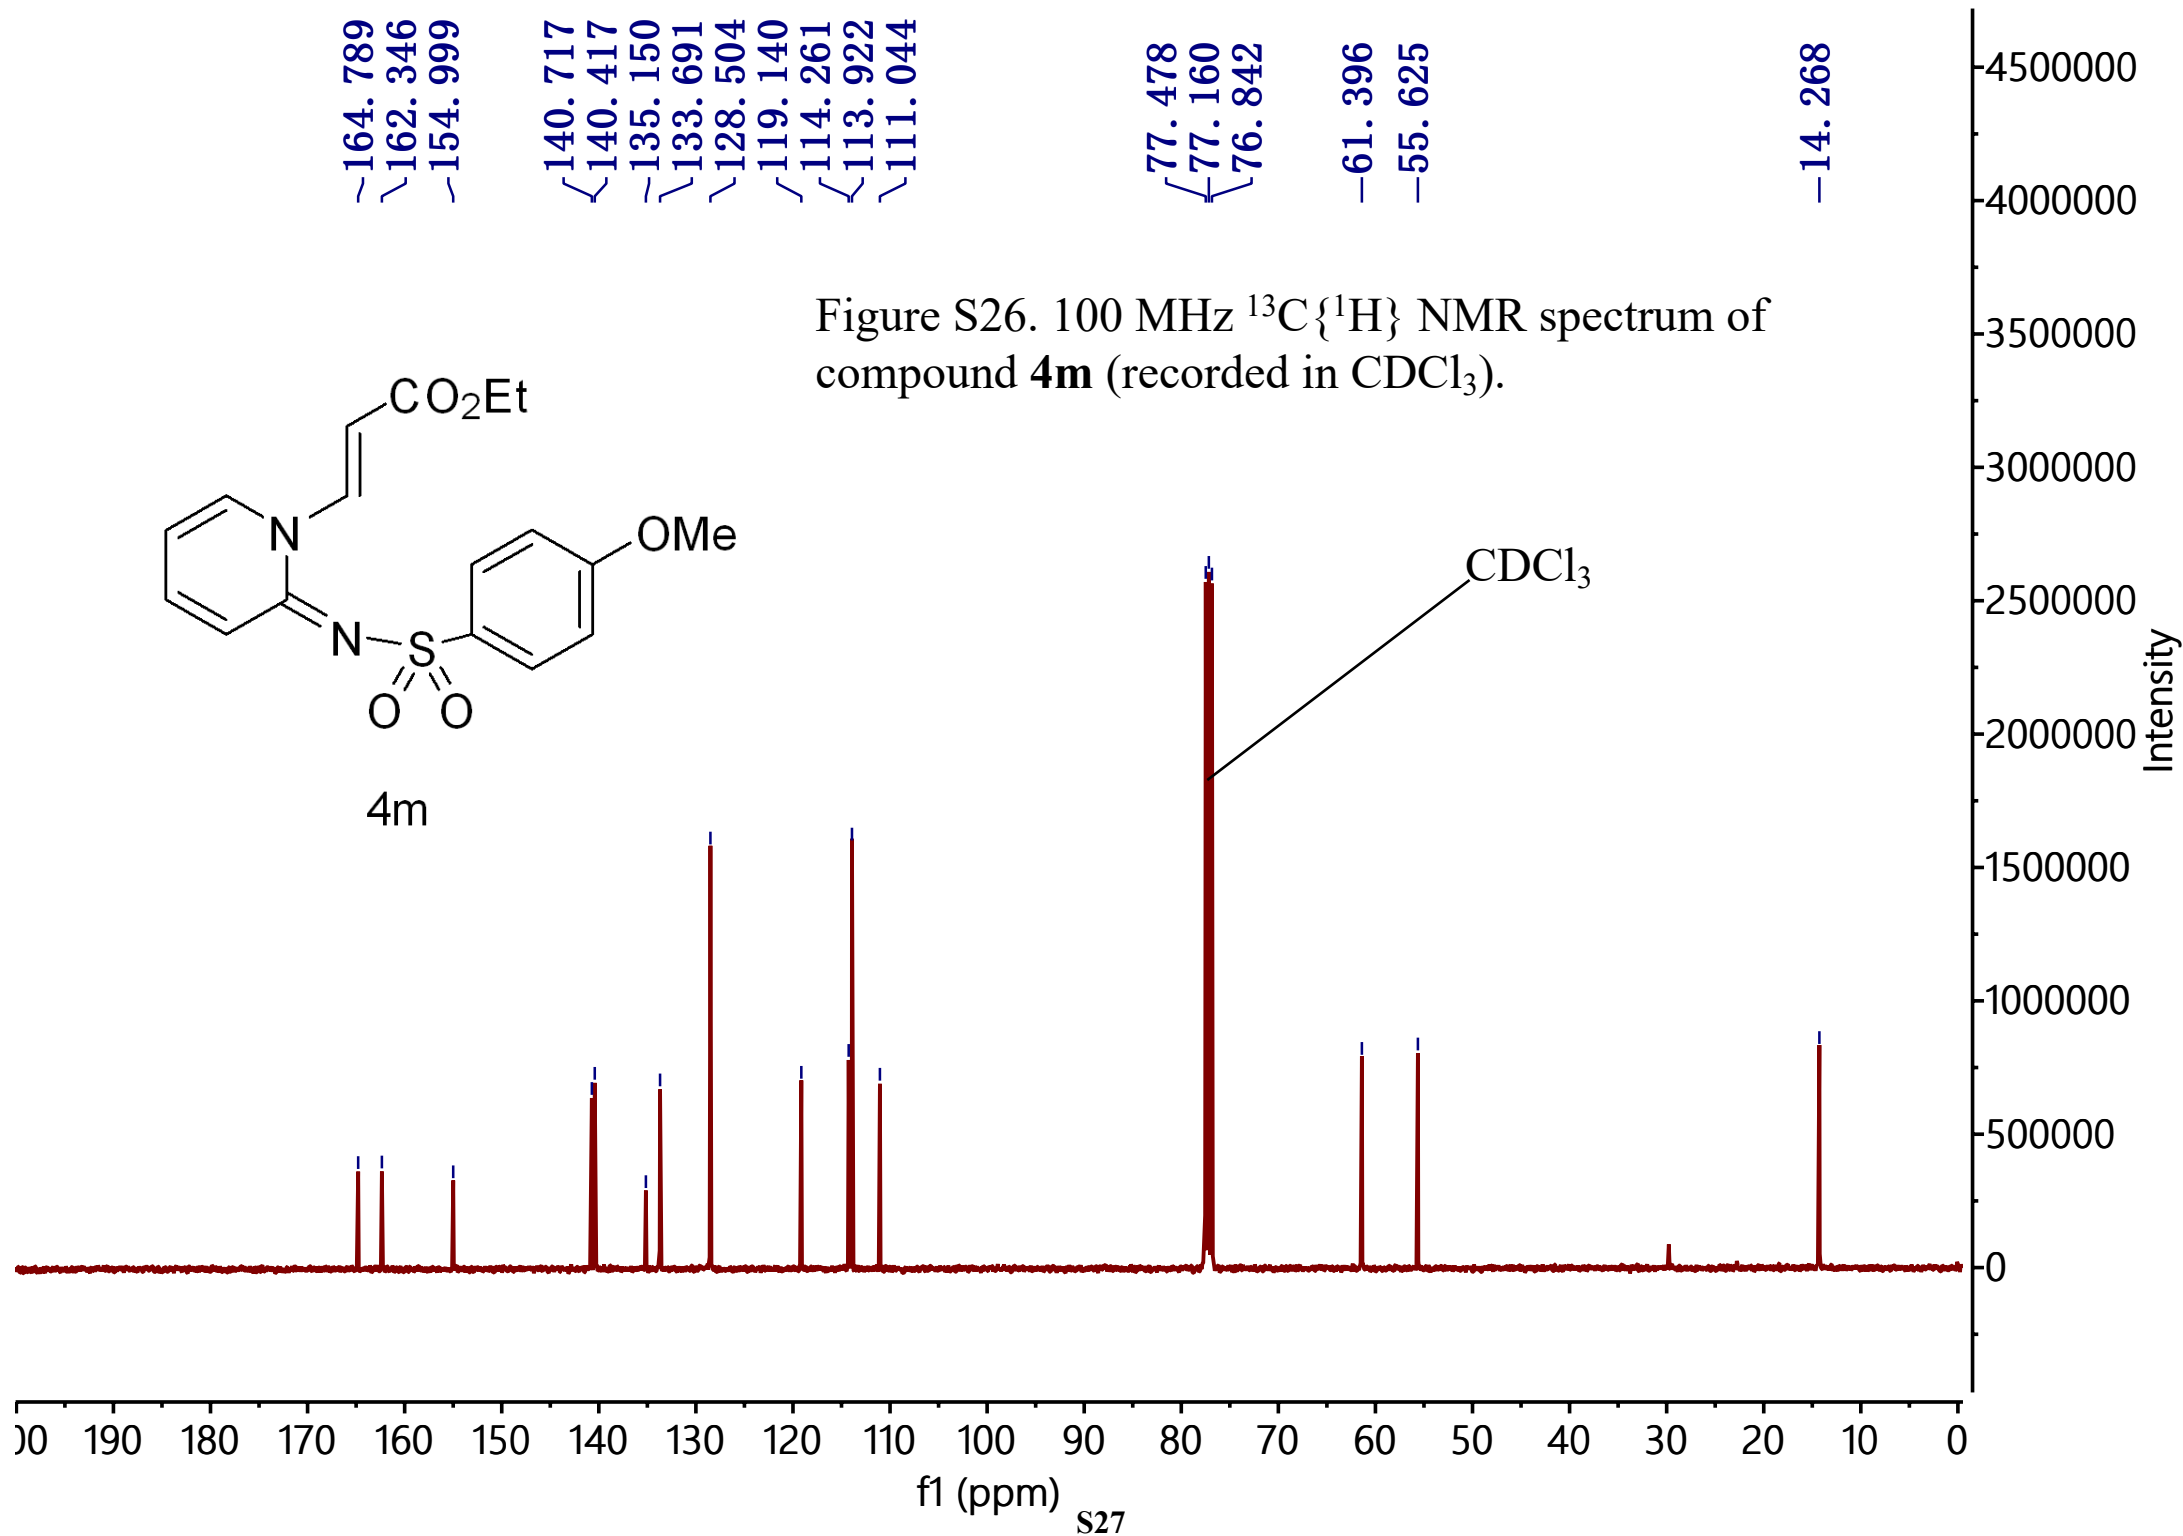

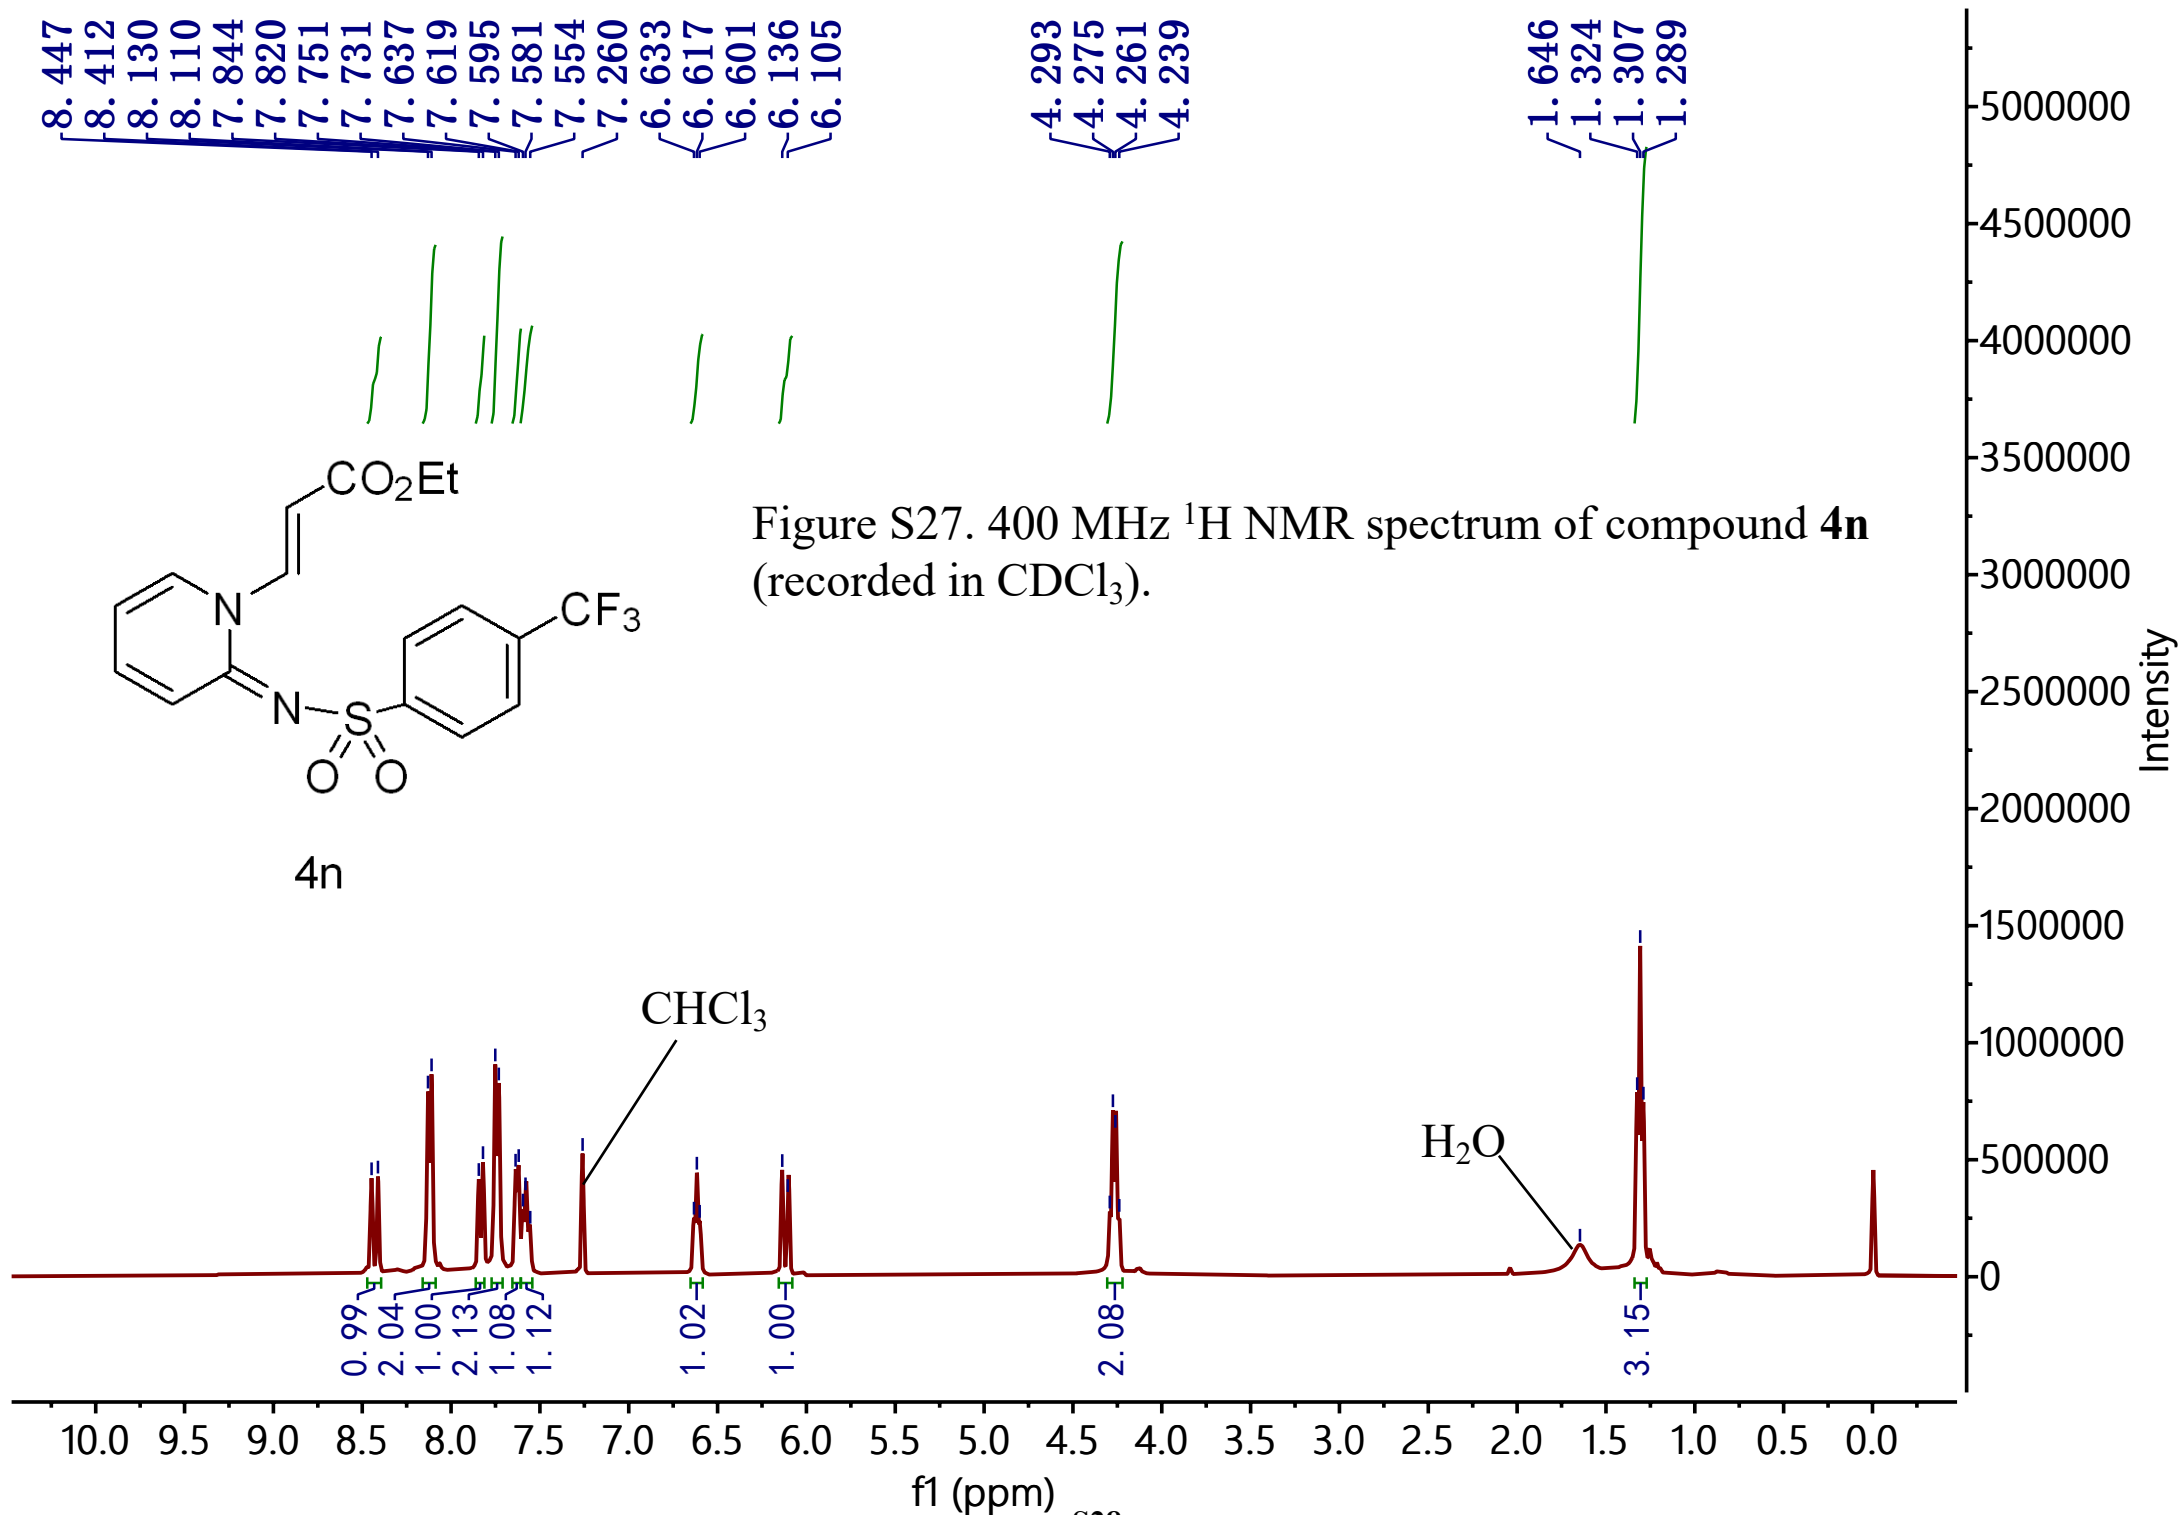

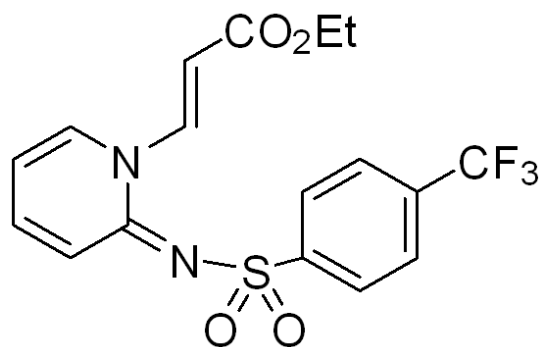

4n

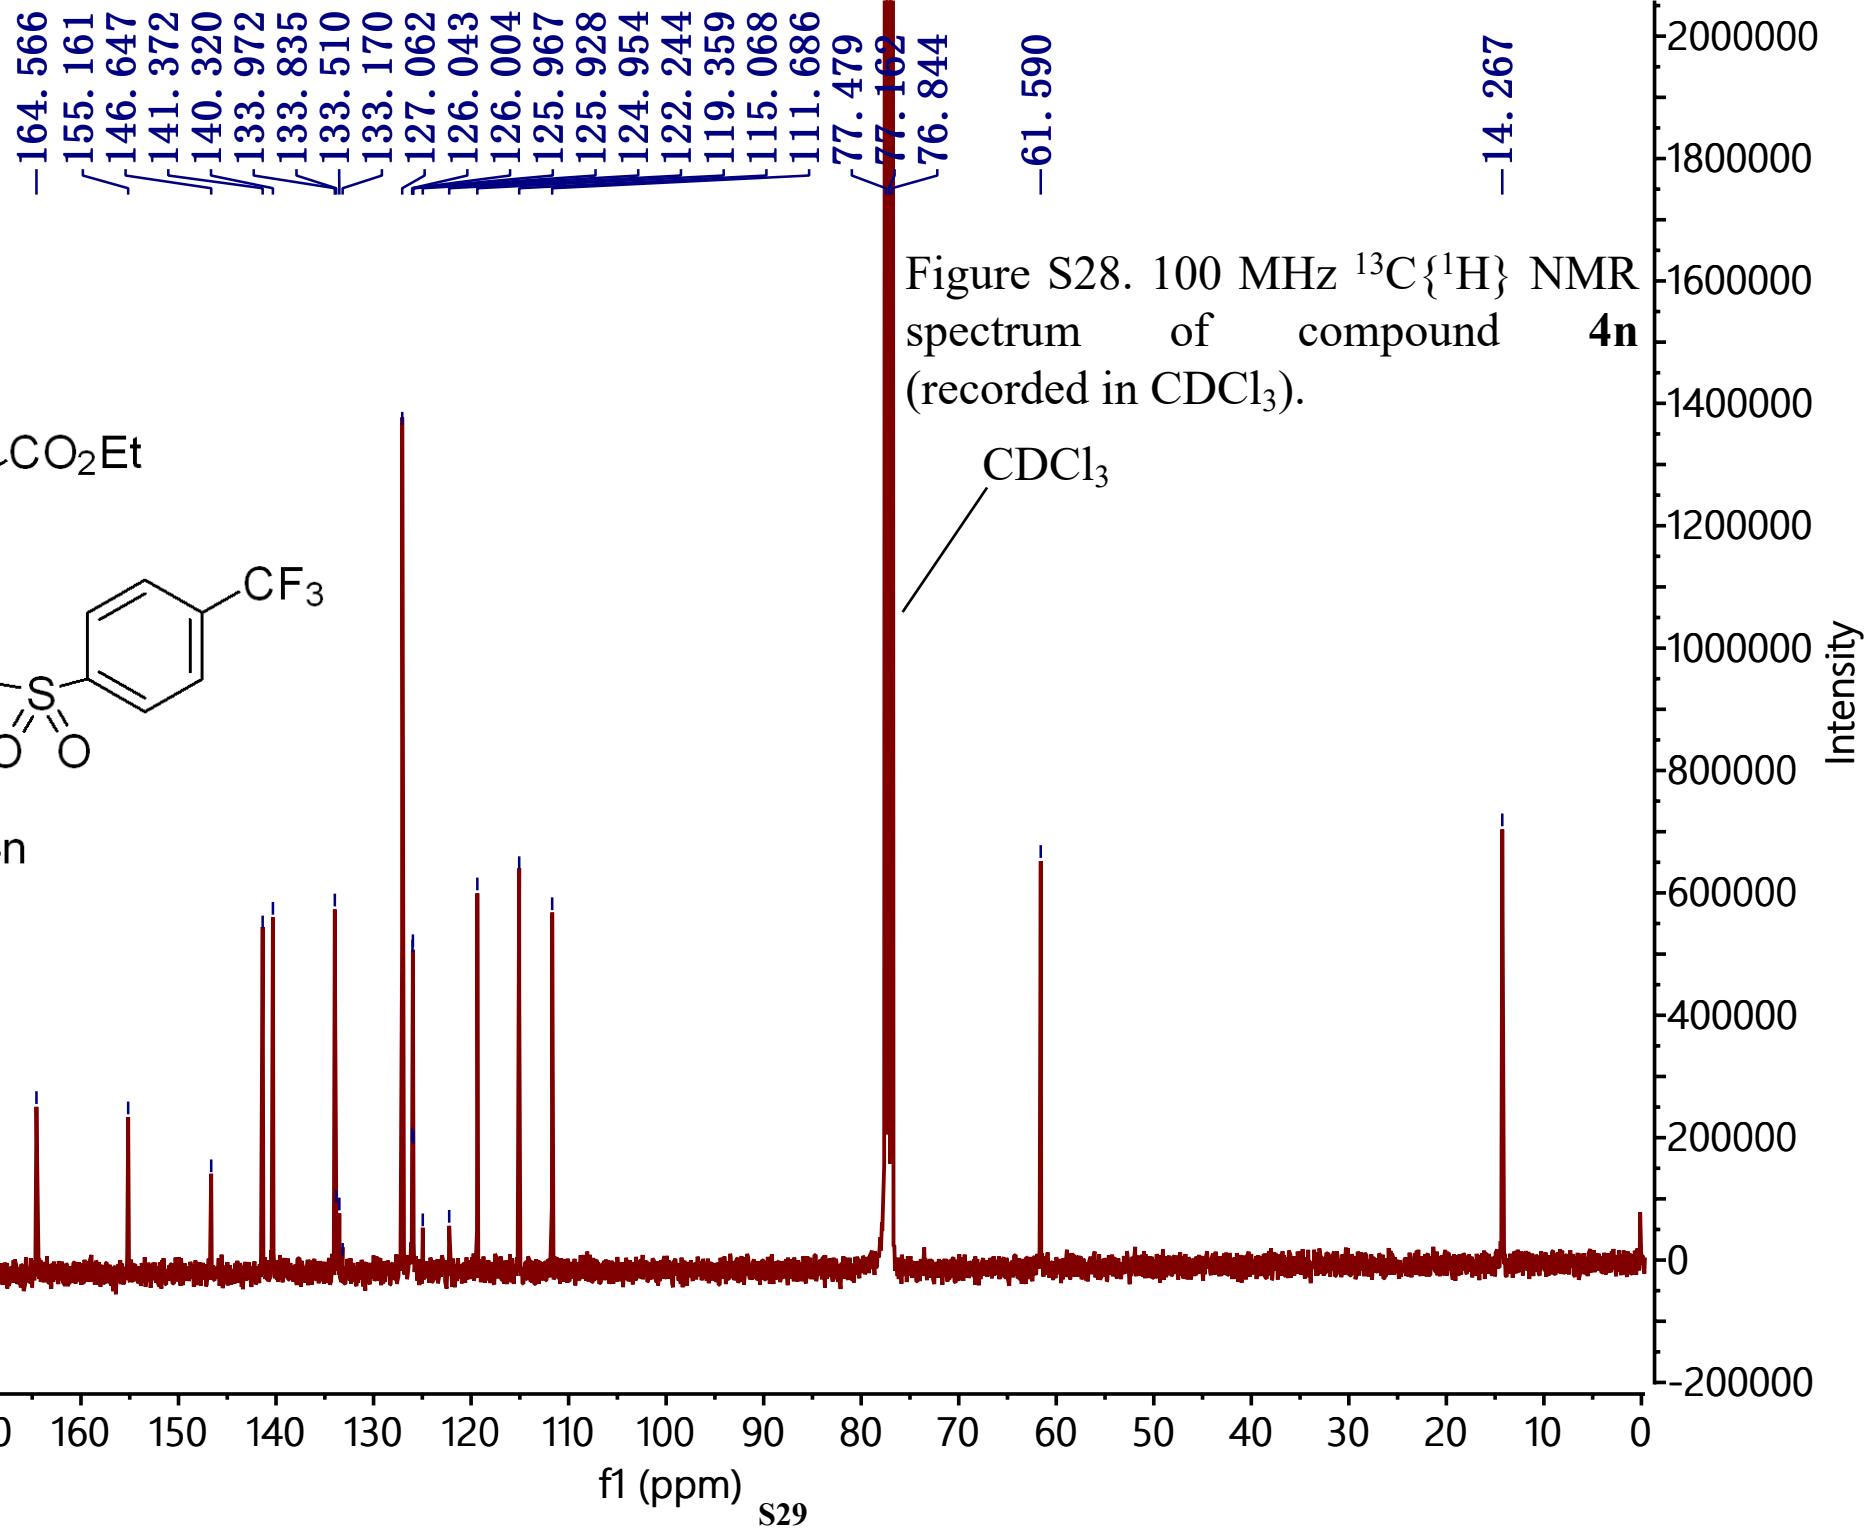

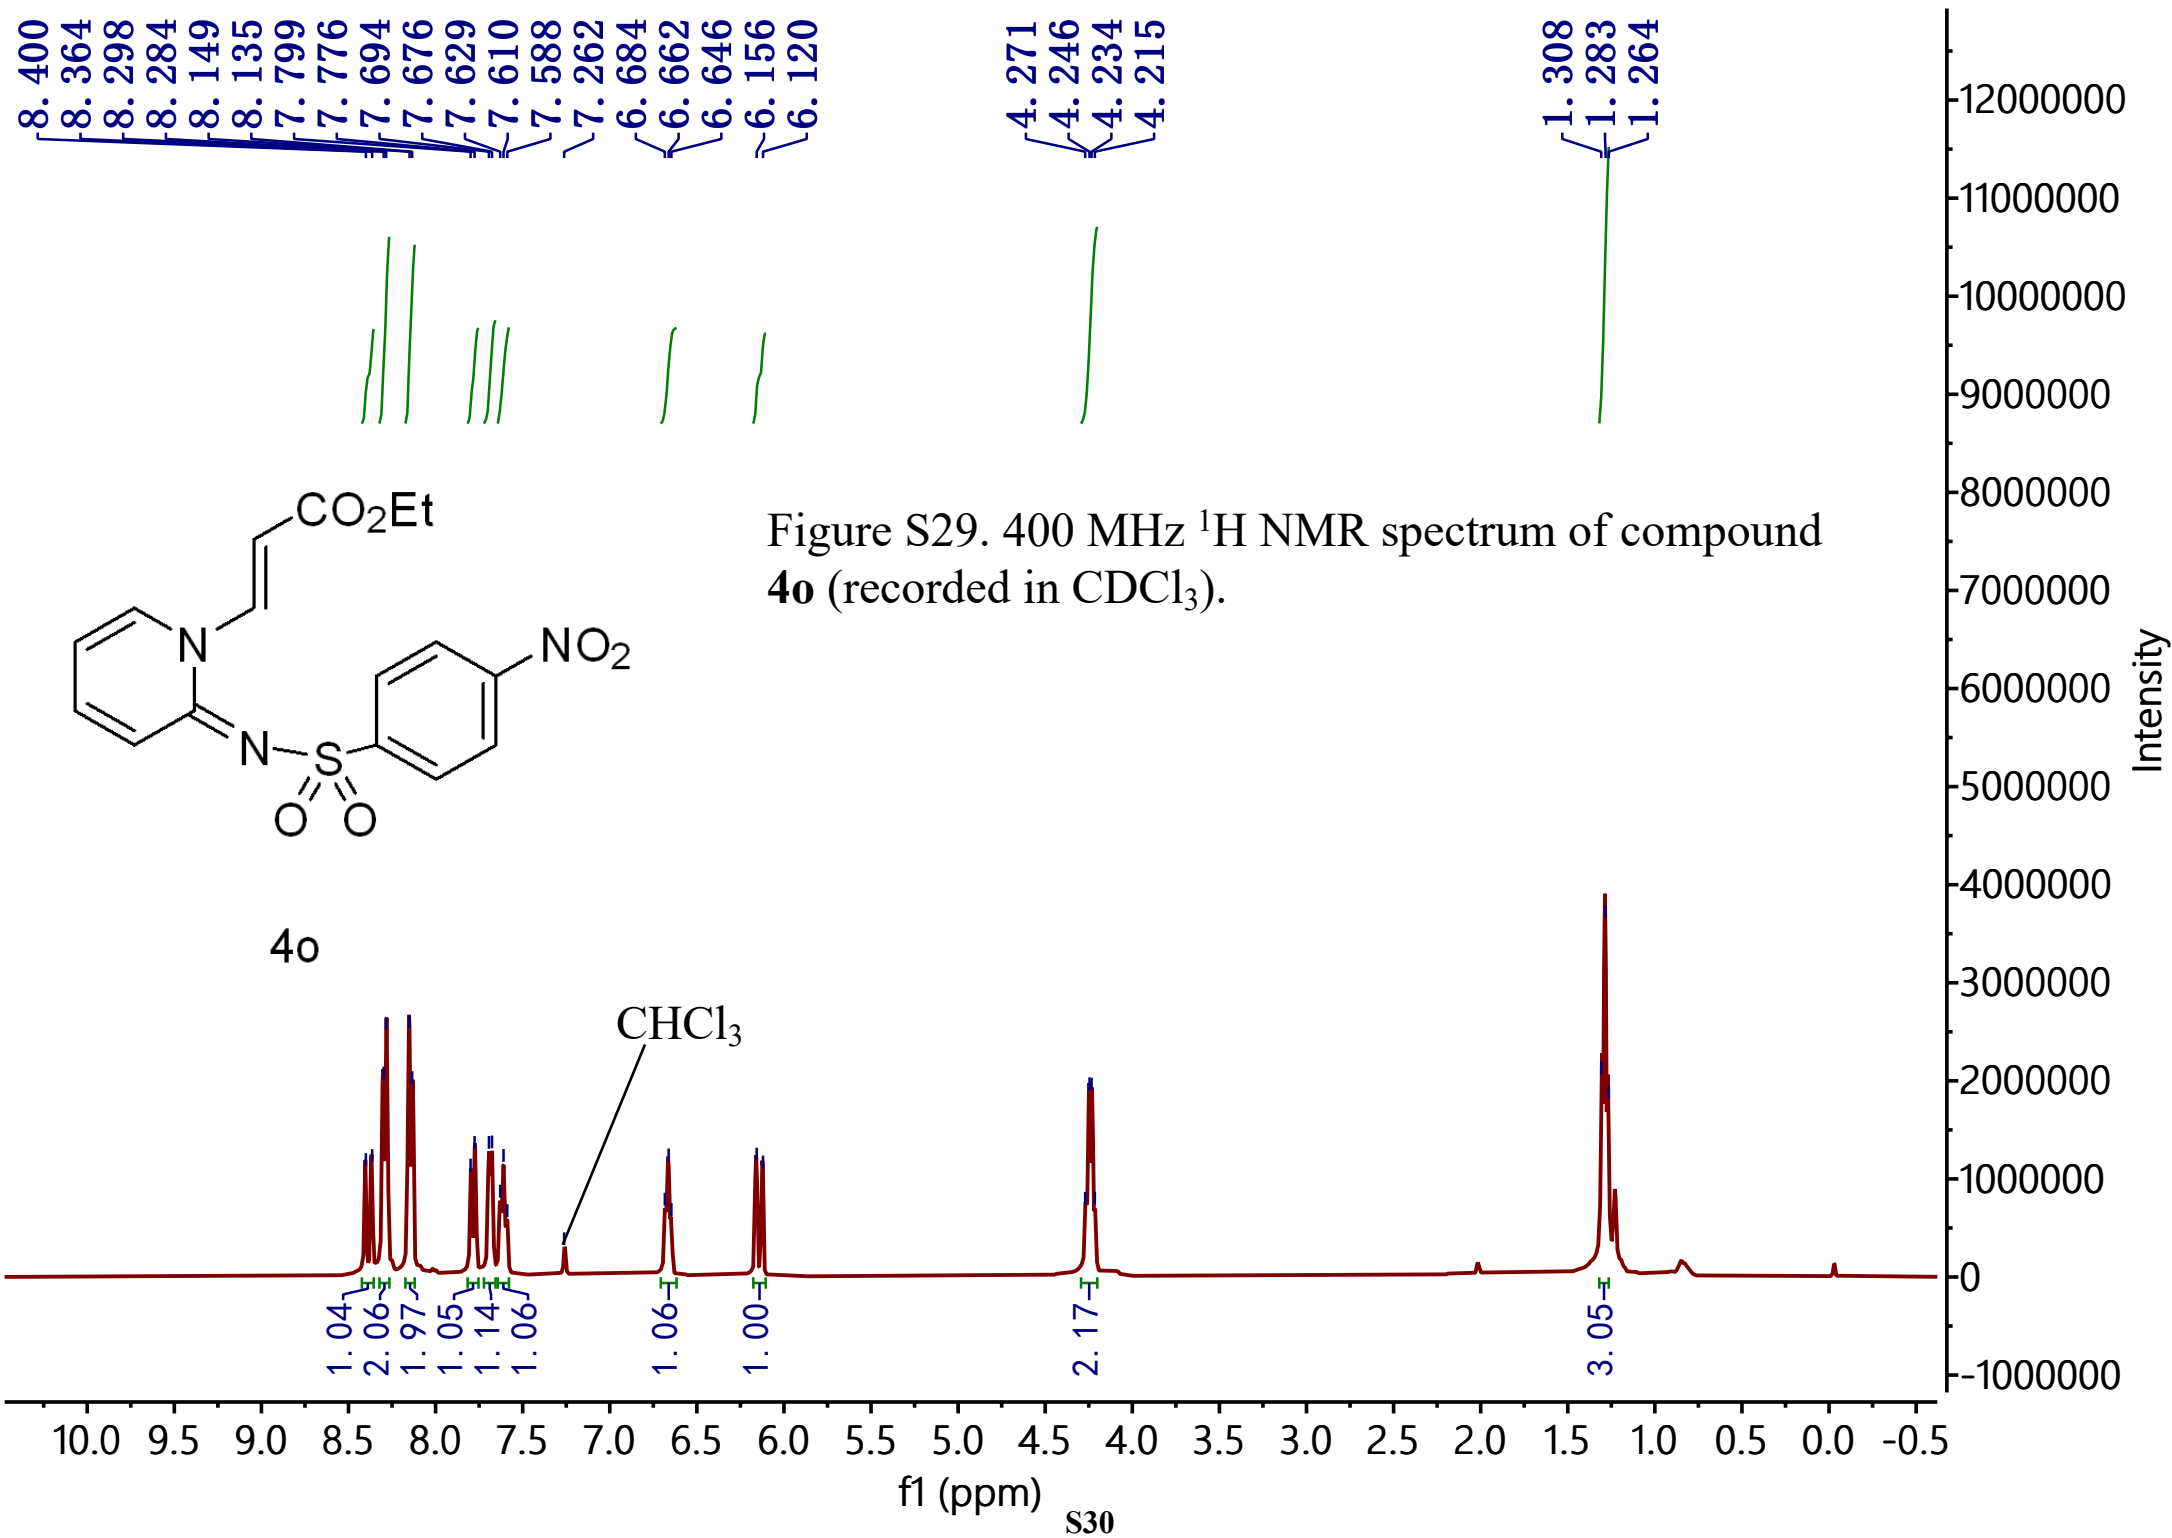

-164.440  
 -155.028  
 -149.603  
 -148.838  
 -141.847  
 -140.153  
 -134.319  
 -127.735  
 -124.097  
 -119.003  
 -115.432  
 -112.109

77.478  
 77.160  
 76.842

-61.565

-14.227

Figure S30. 100 MHz  $^{13}\text{C}\{^1\text{H}\}$  NMR spectrum of compound **4o** (recorded in  $\text{CDCl}_3$ ).

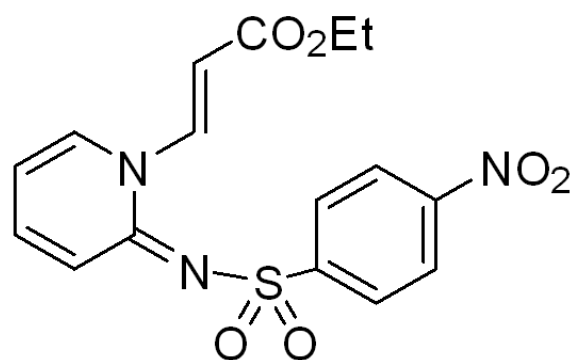

**4o**

$\text{CDCl}_3$

Intensity

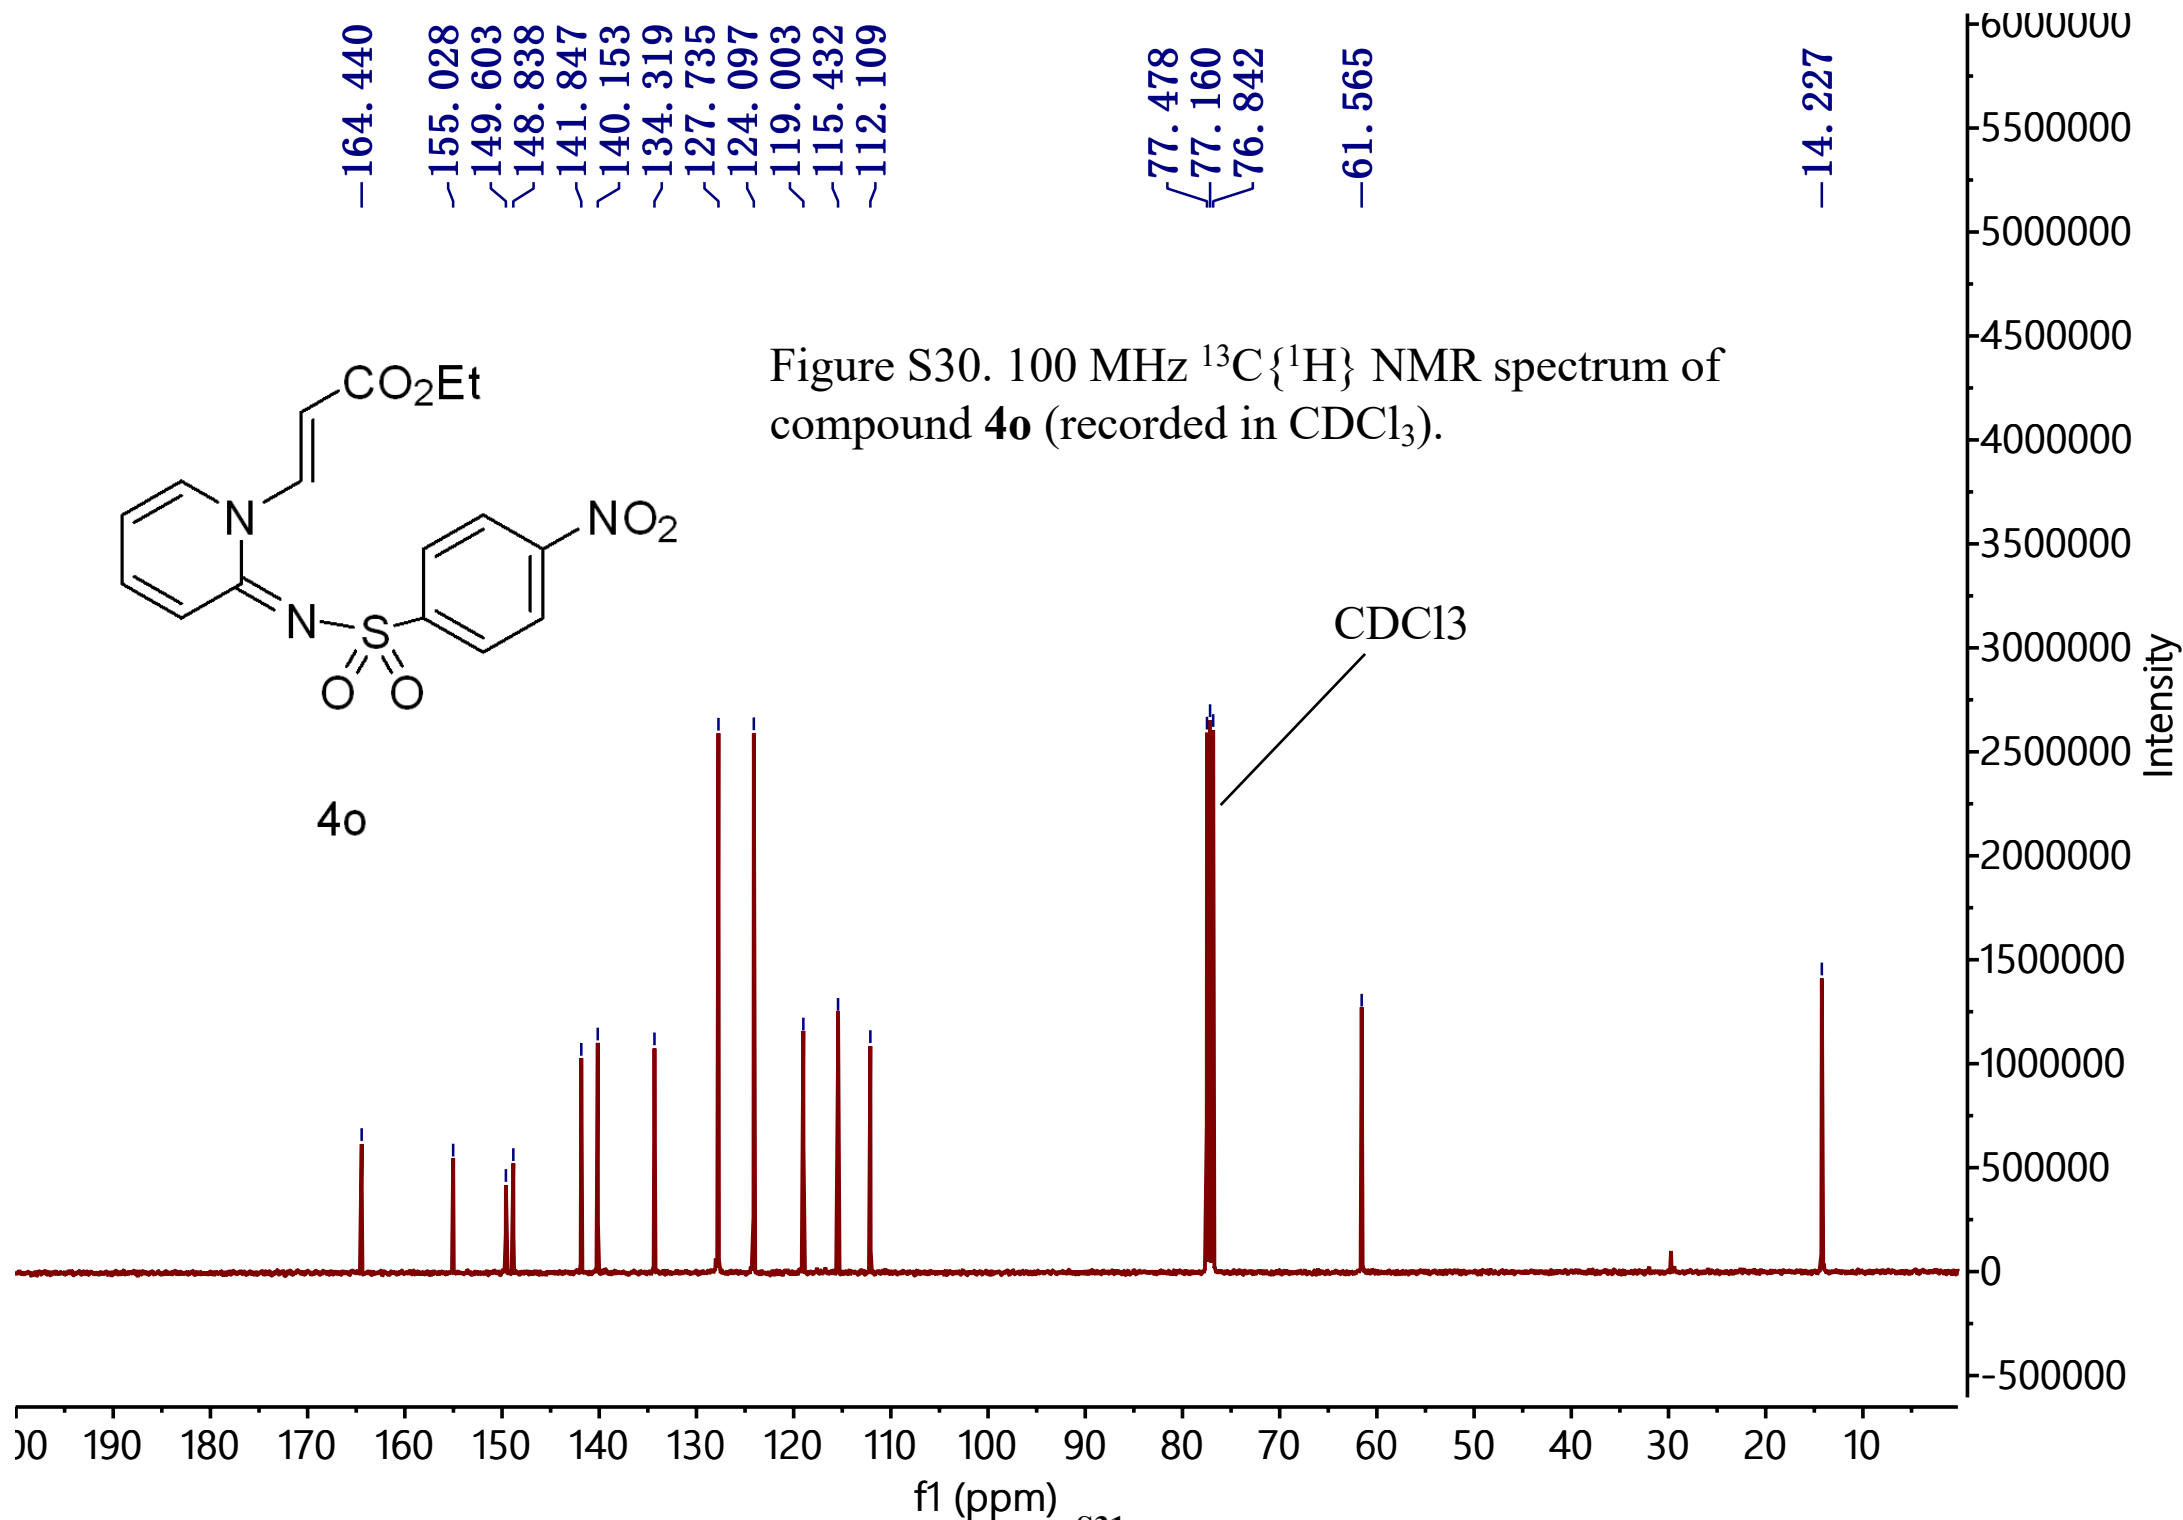

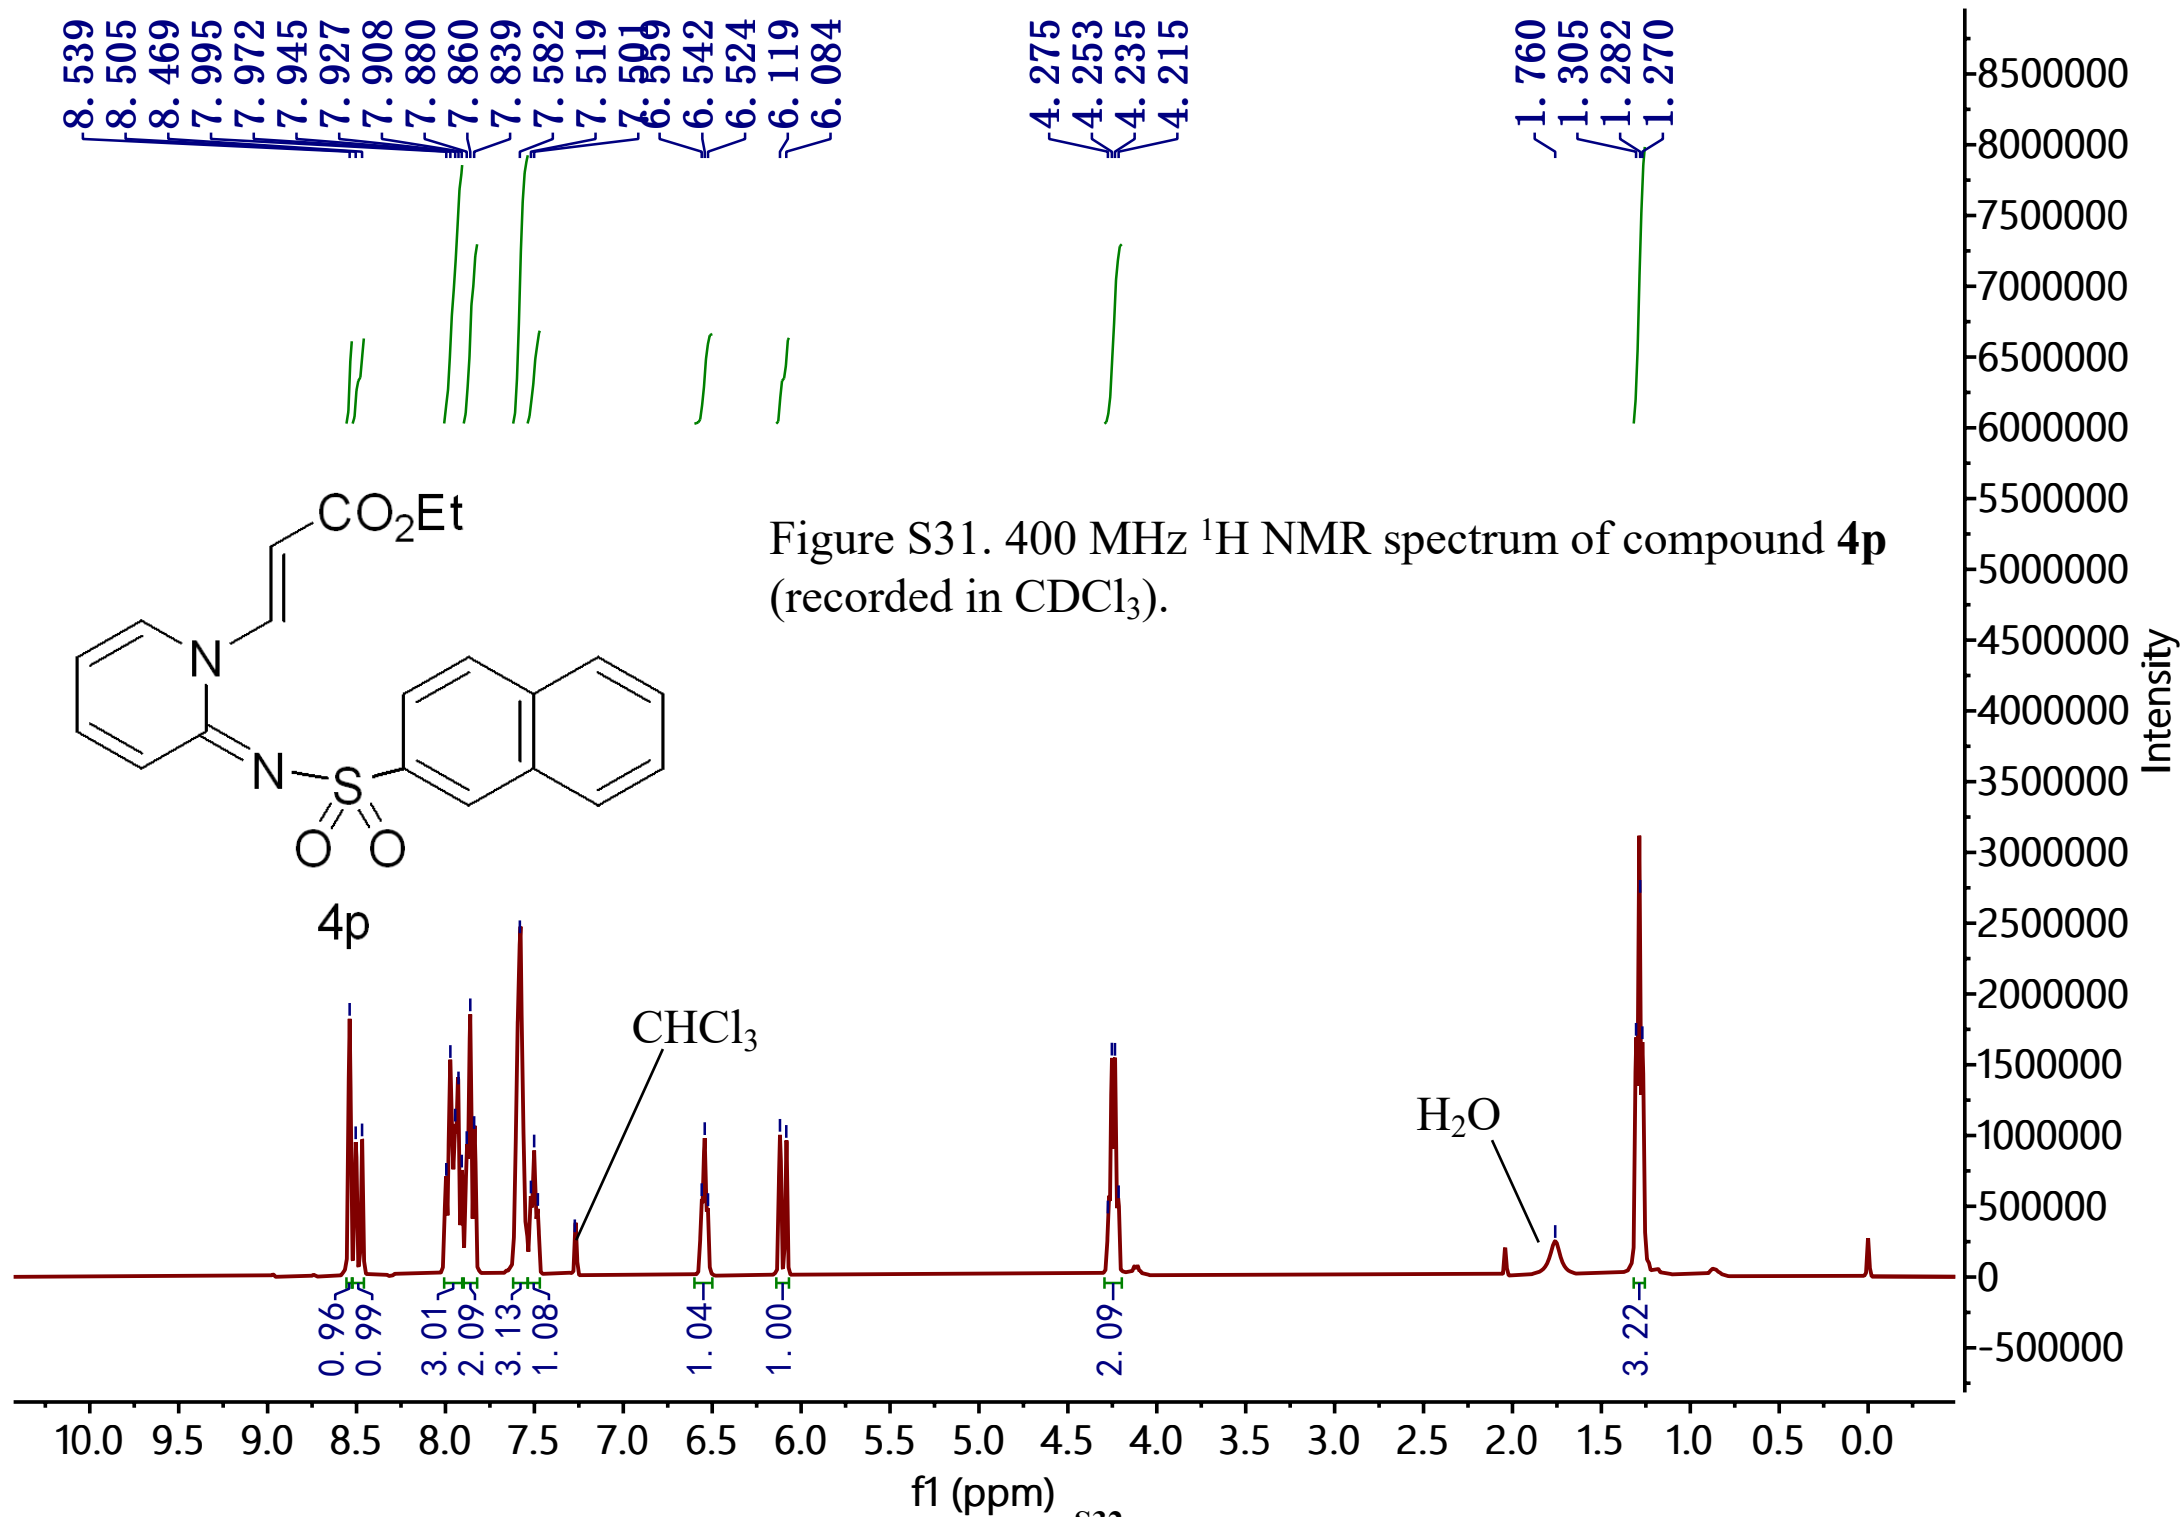



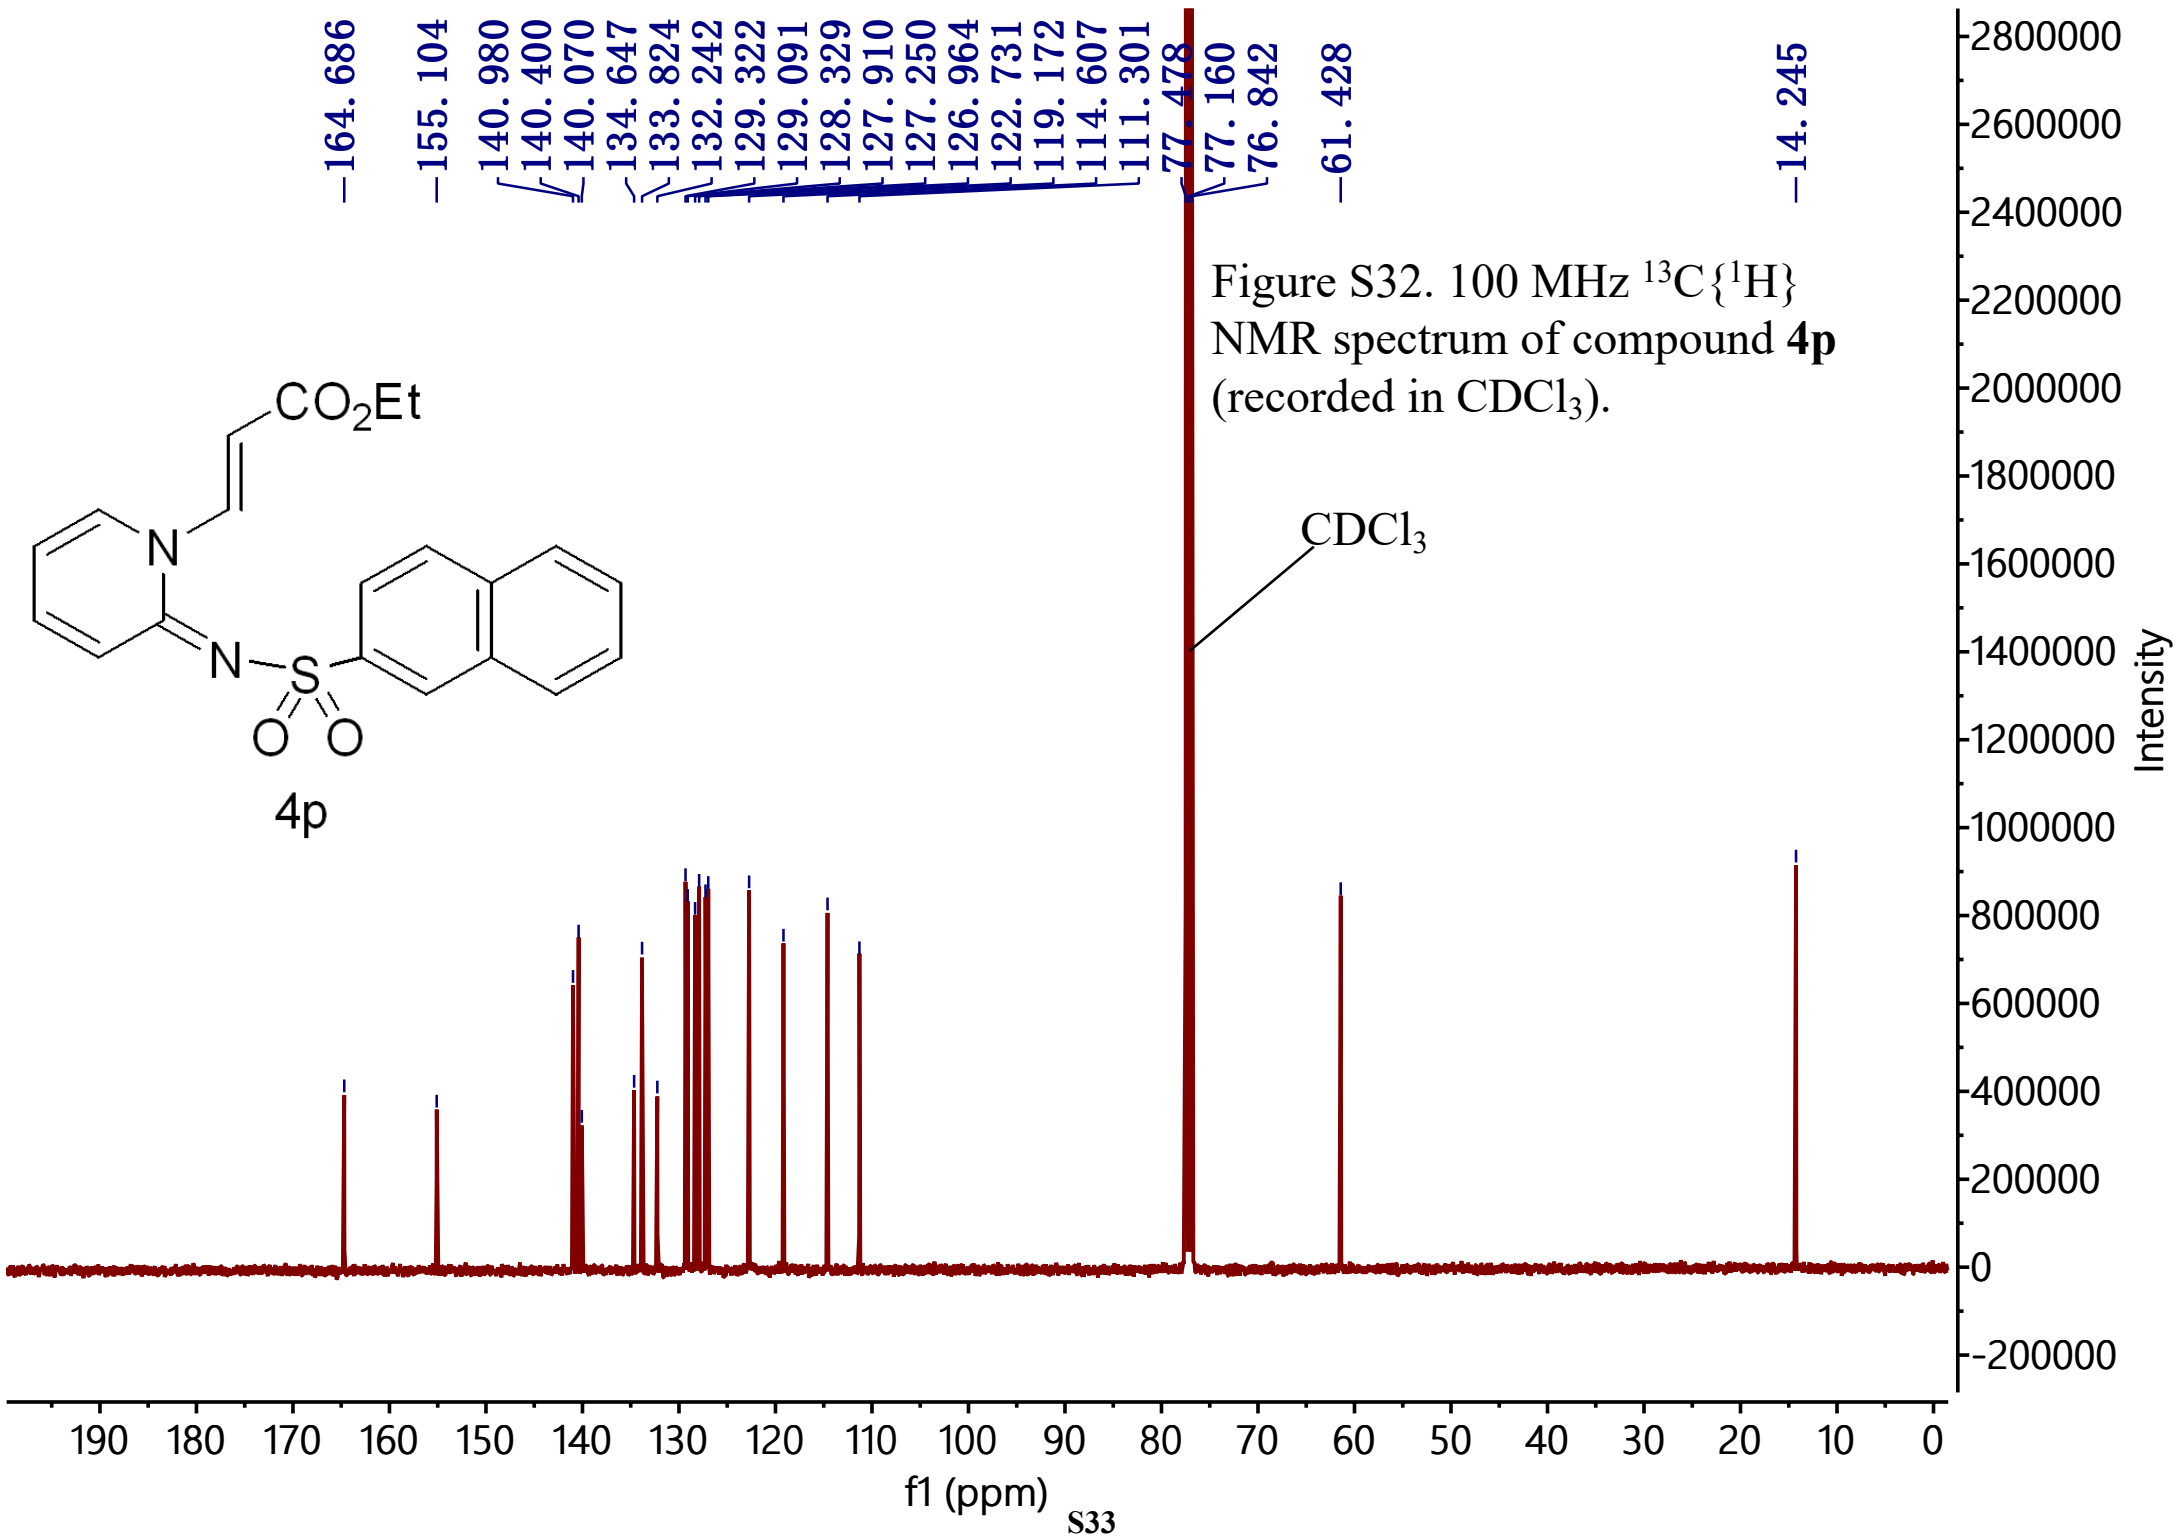

8.470  
8.434  
7.717  
7.693  
7.585  
7.569  
7.495  
7.475  
7.456  
7.259  
6.537  
6.519  
6.497  
6.126  
6.090

4.311  
4.288  
4.272  
4.251

3.097

1.677  
1.343  
1.331  
1.311

Figure S33. 400 MHz  $^1\text{H}$  NMR spectrum of compound **4q** (recorded in  $\text{CDCl}_3$ ).

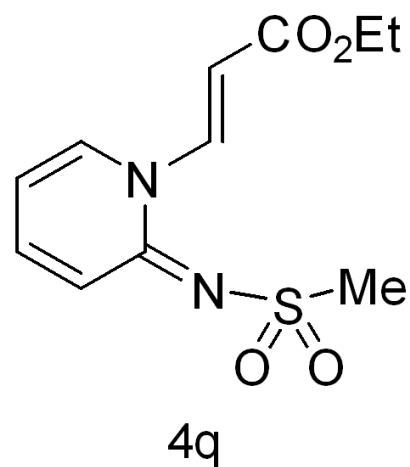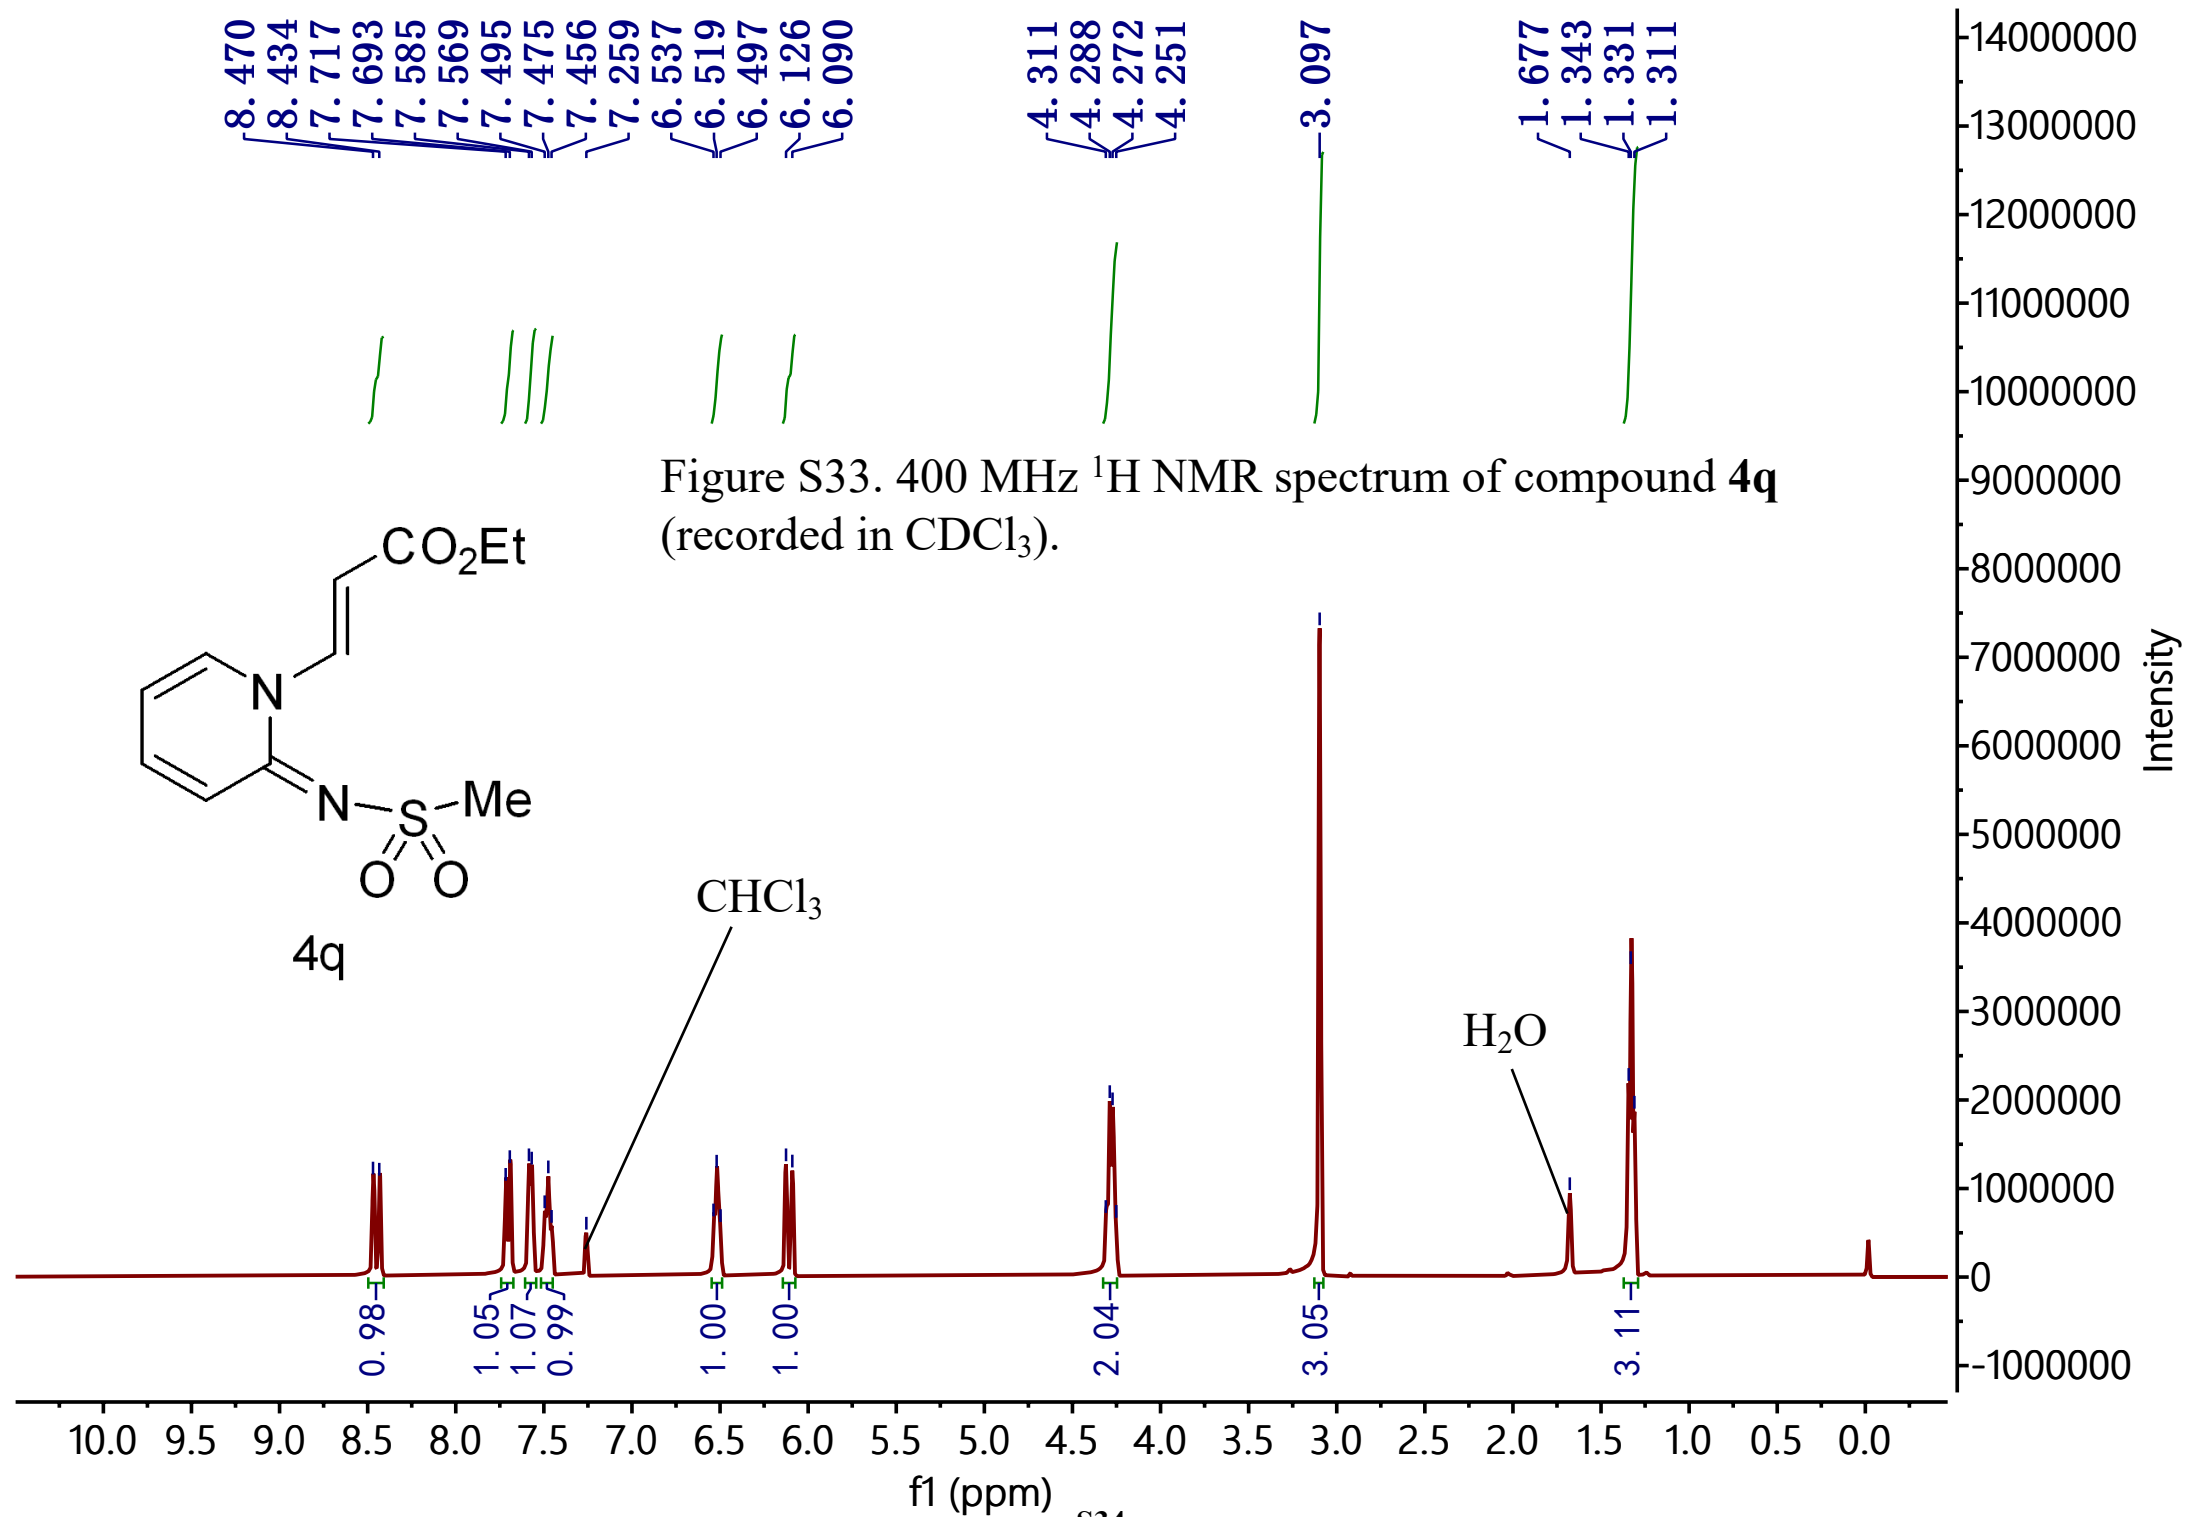

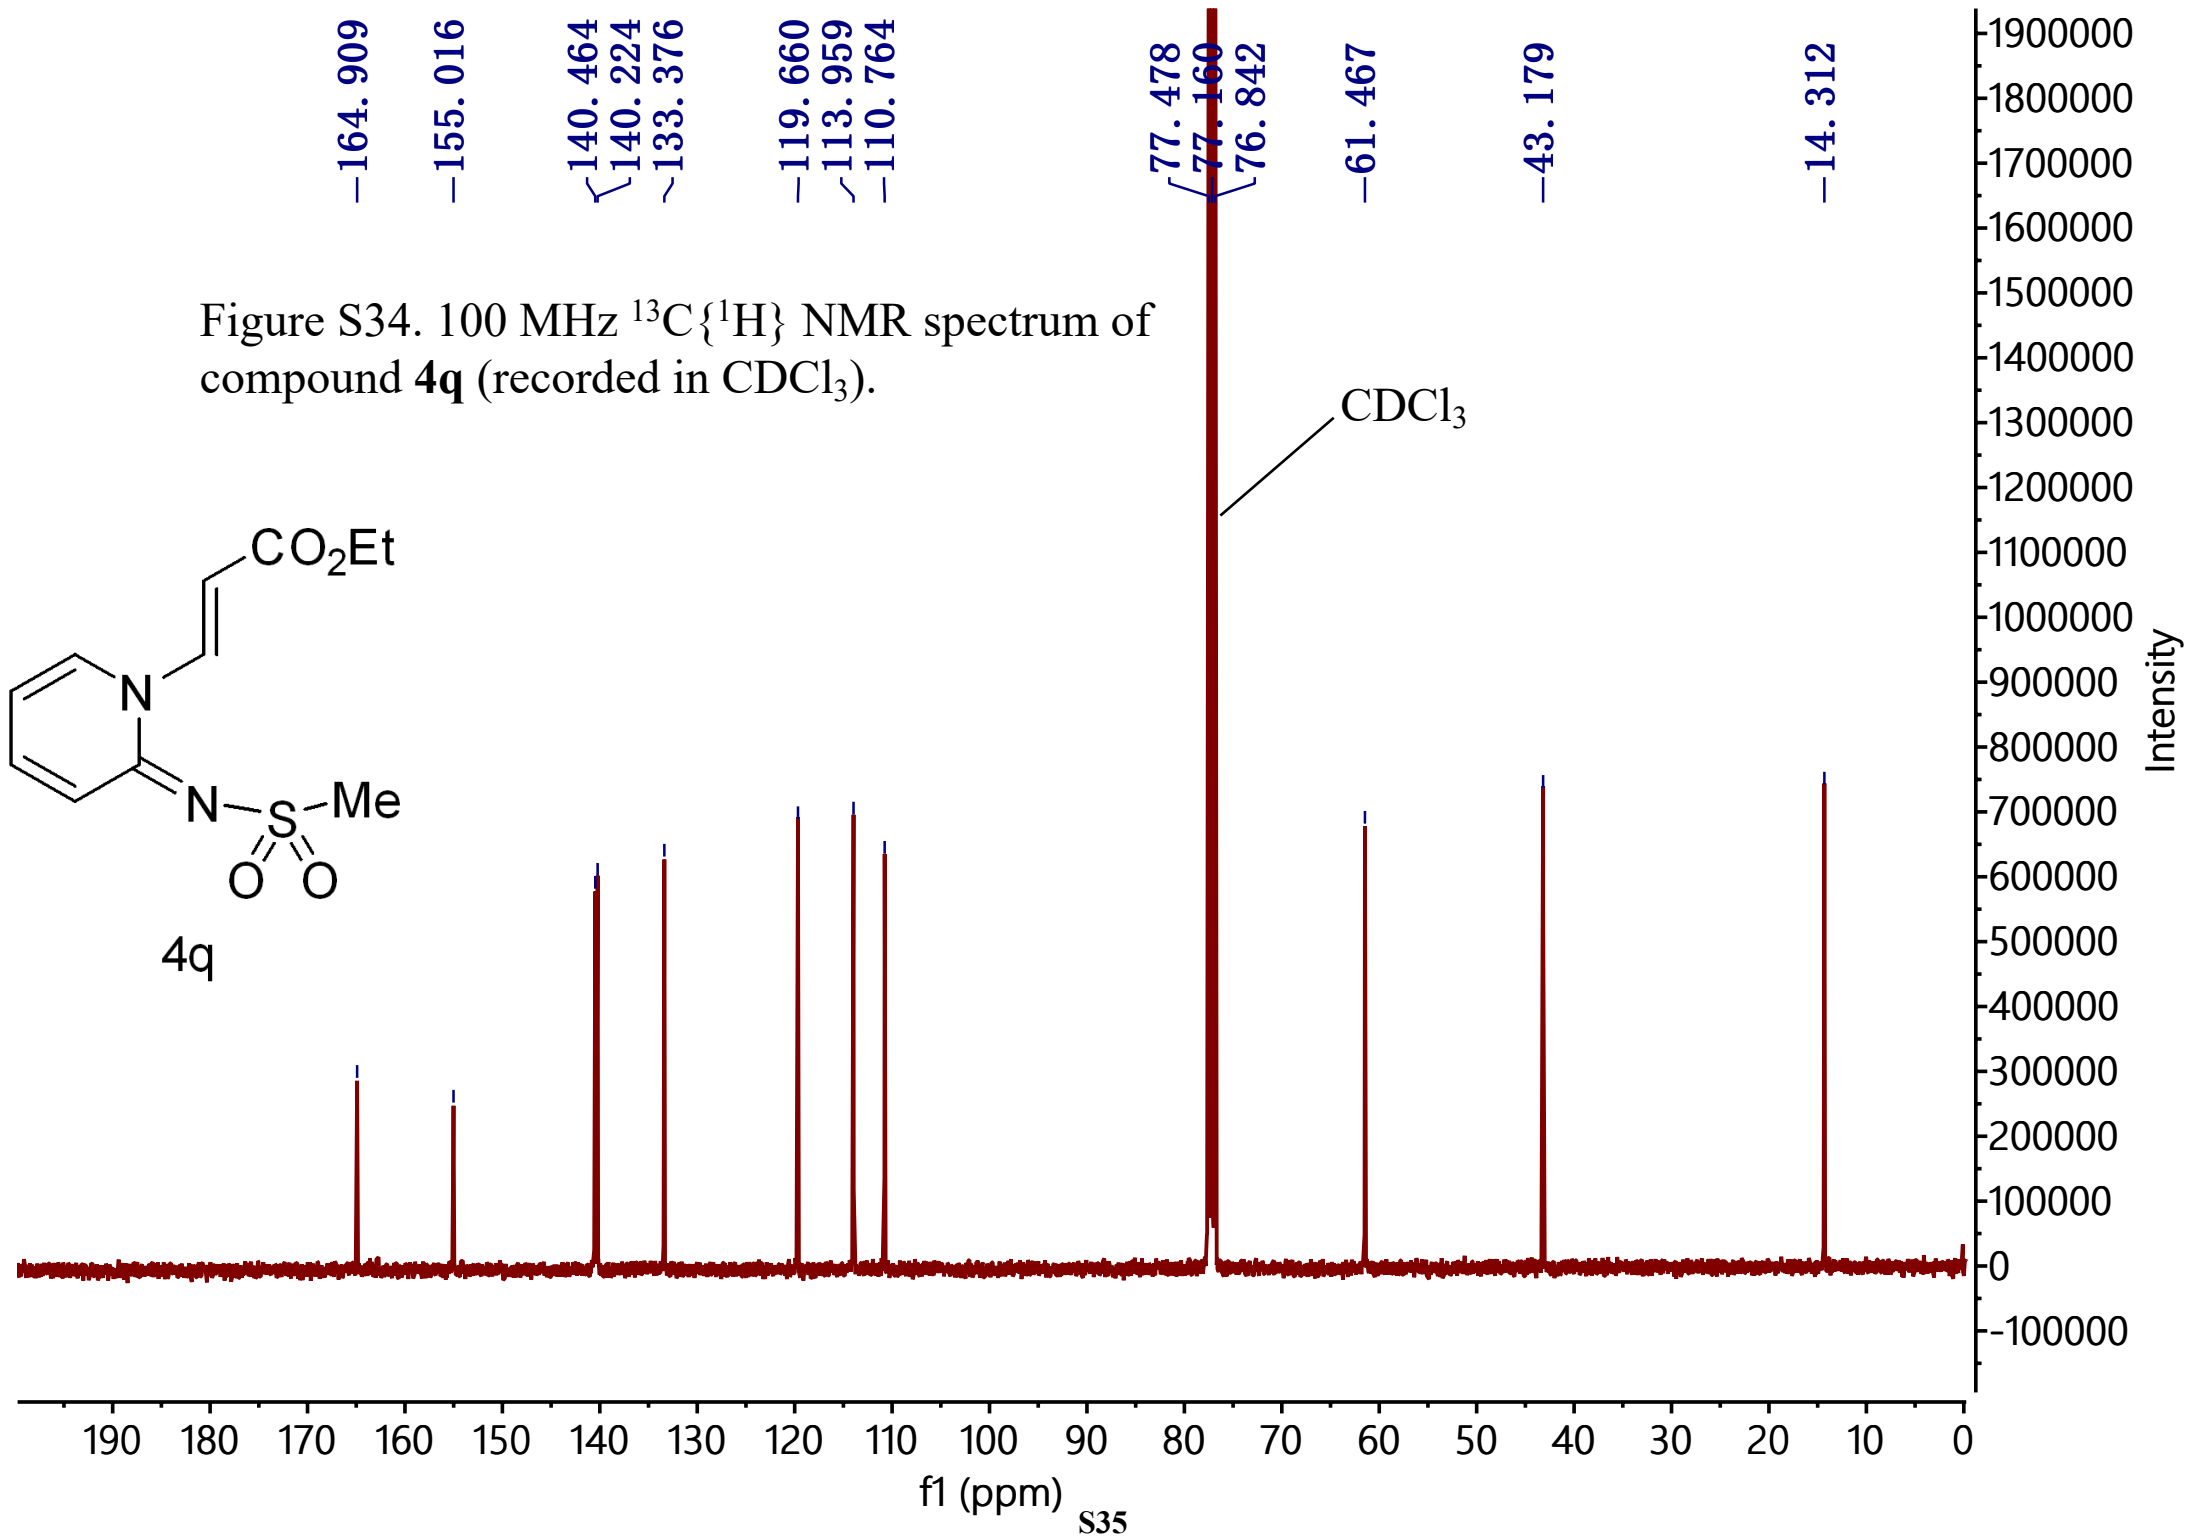

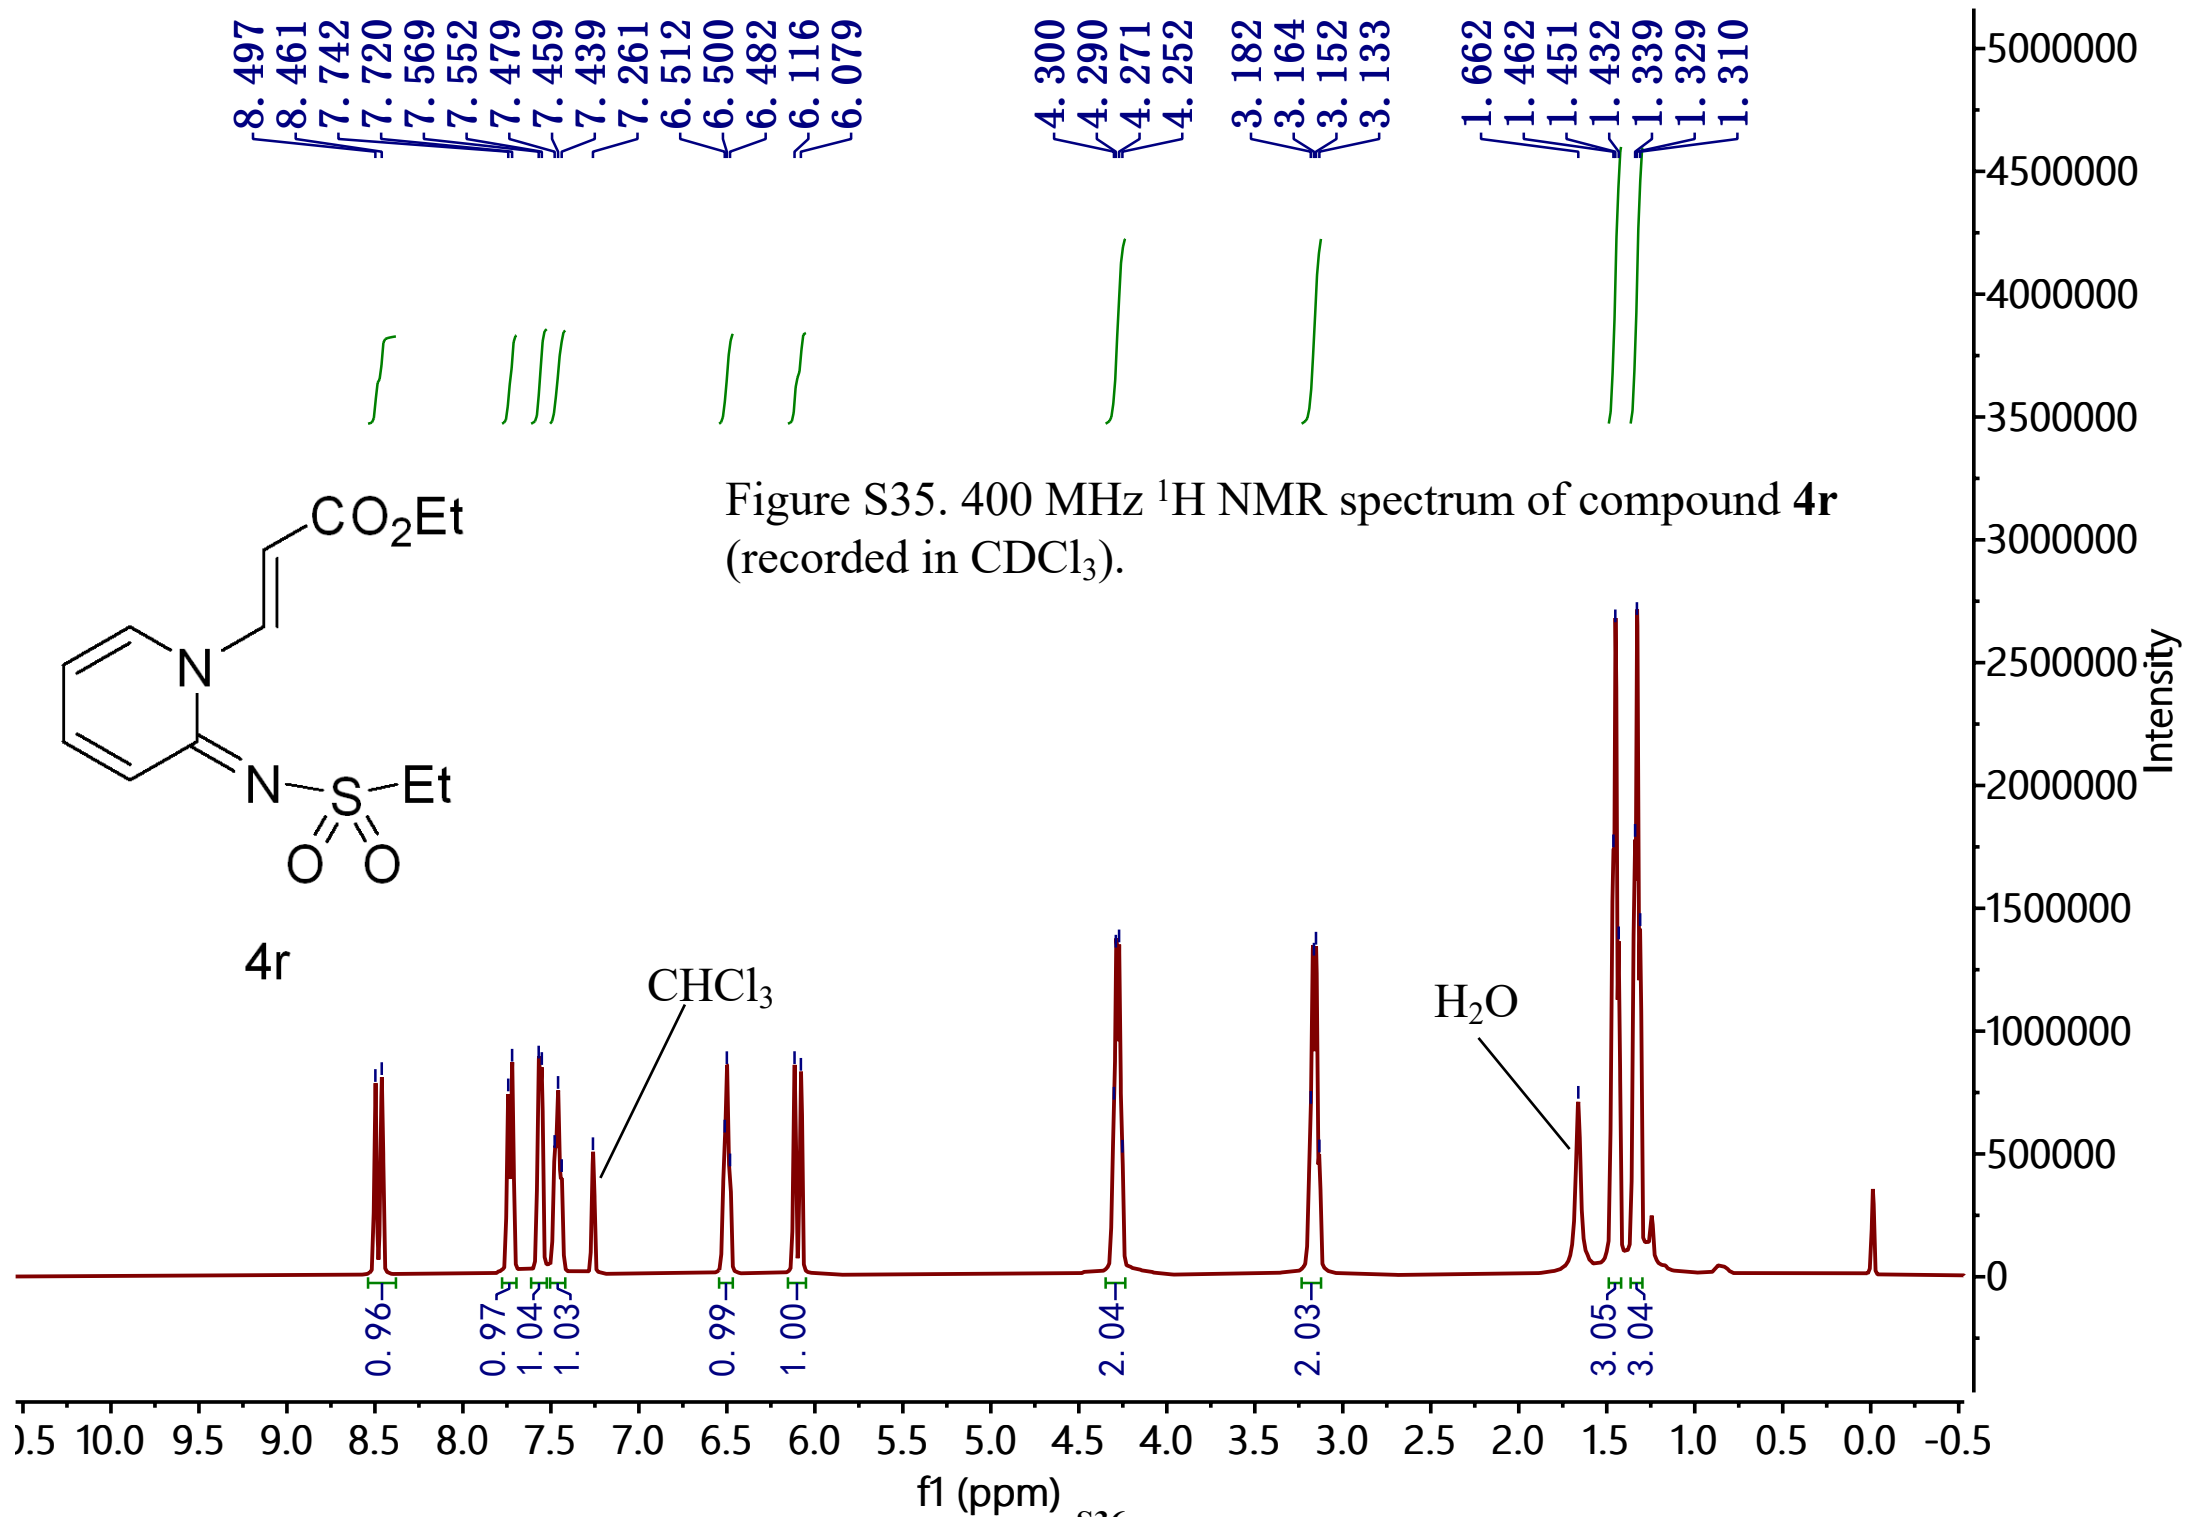

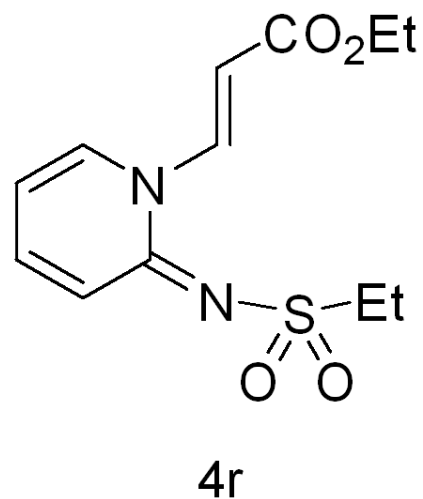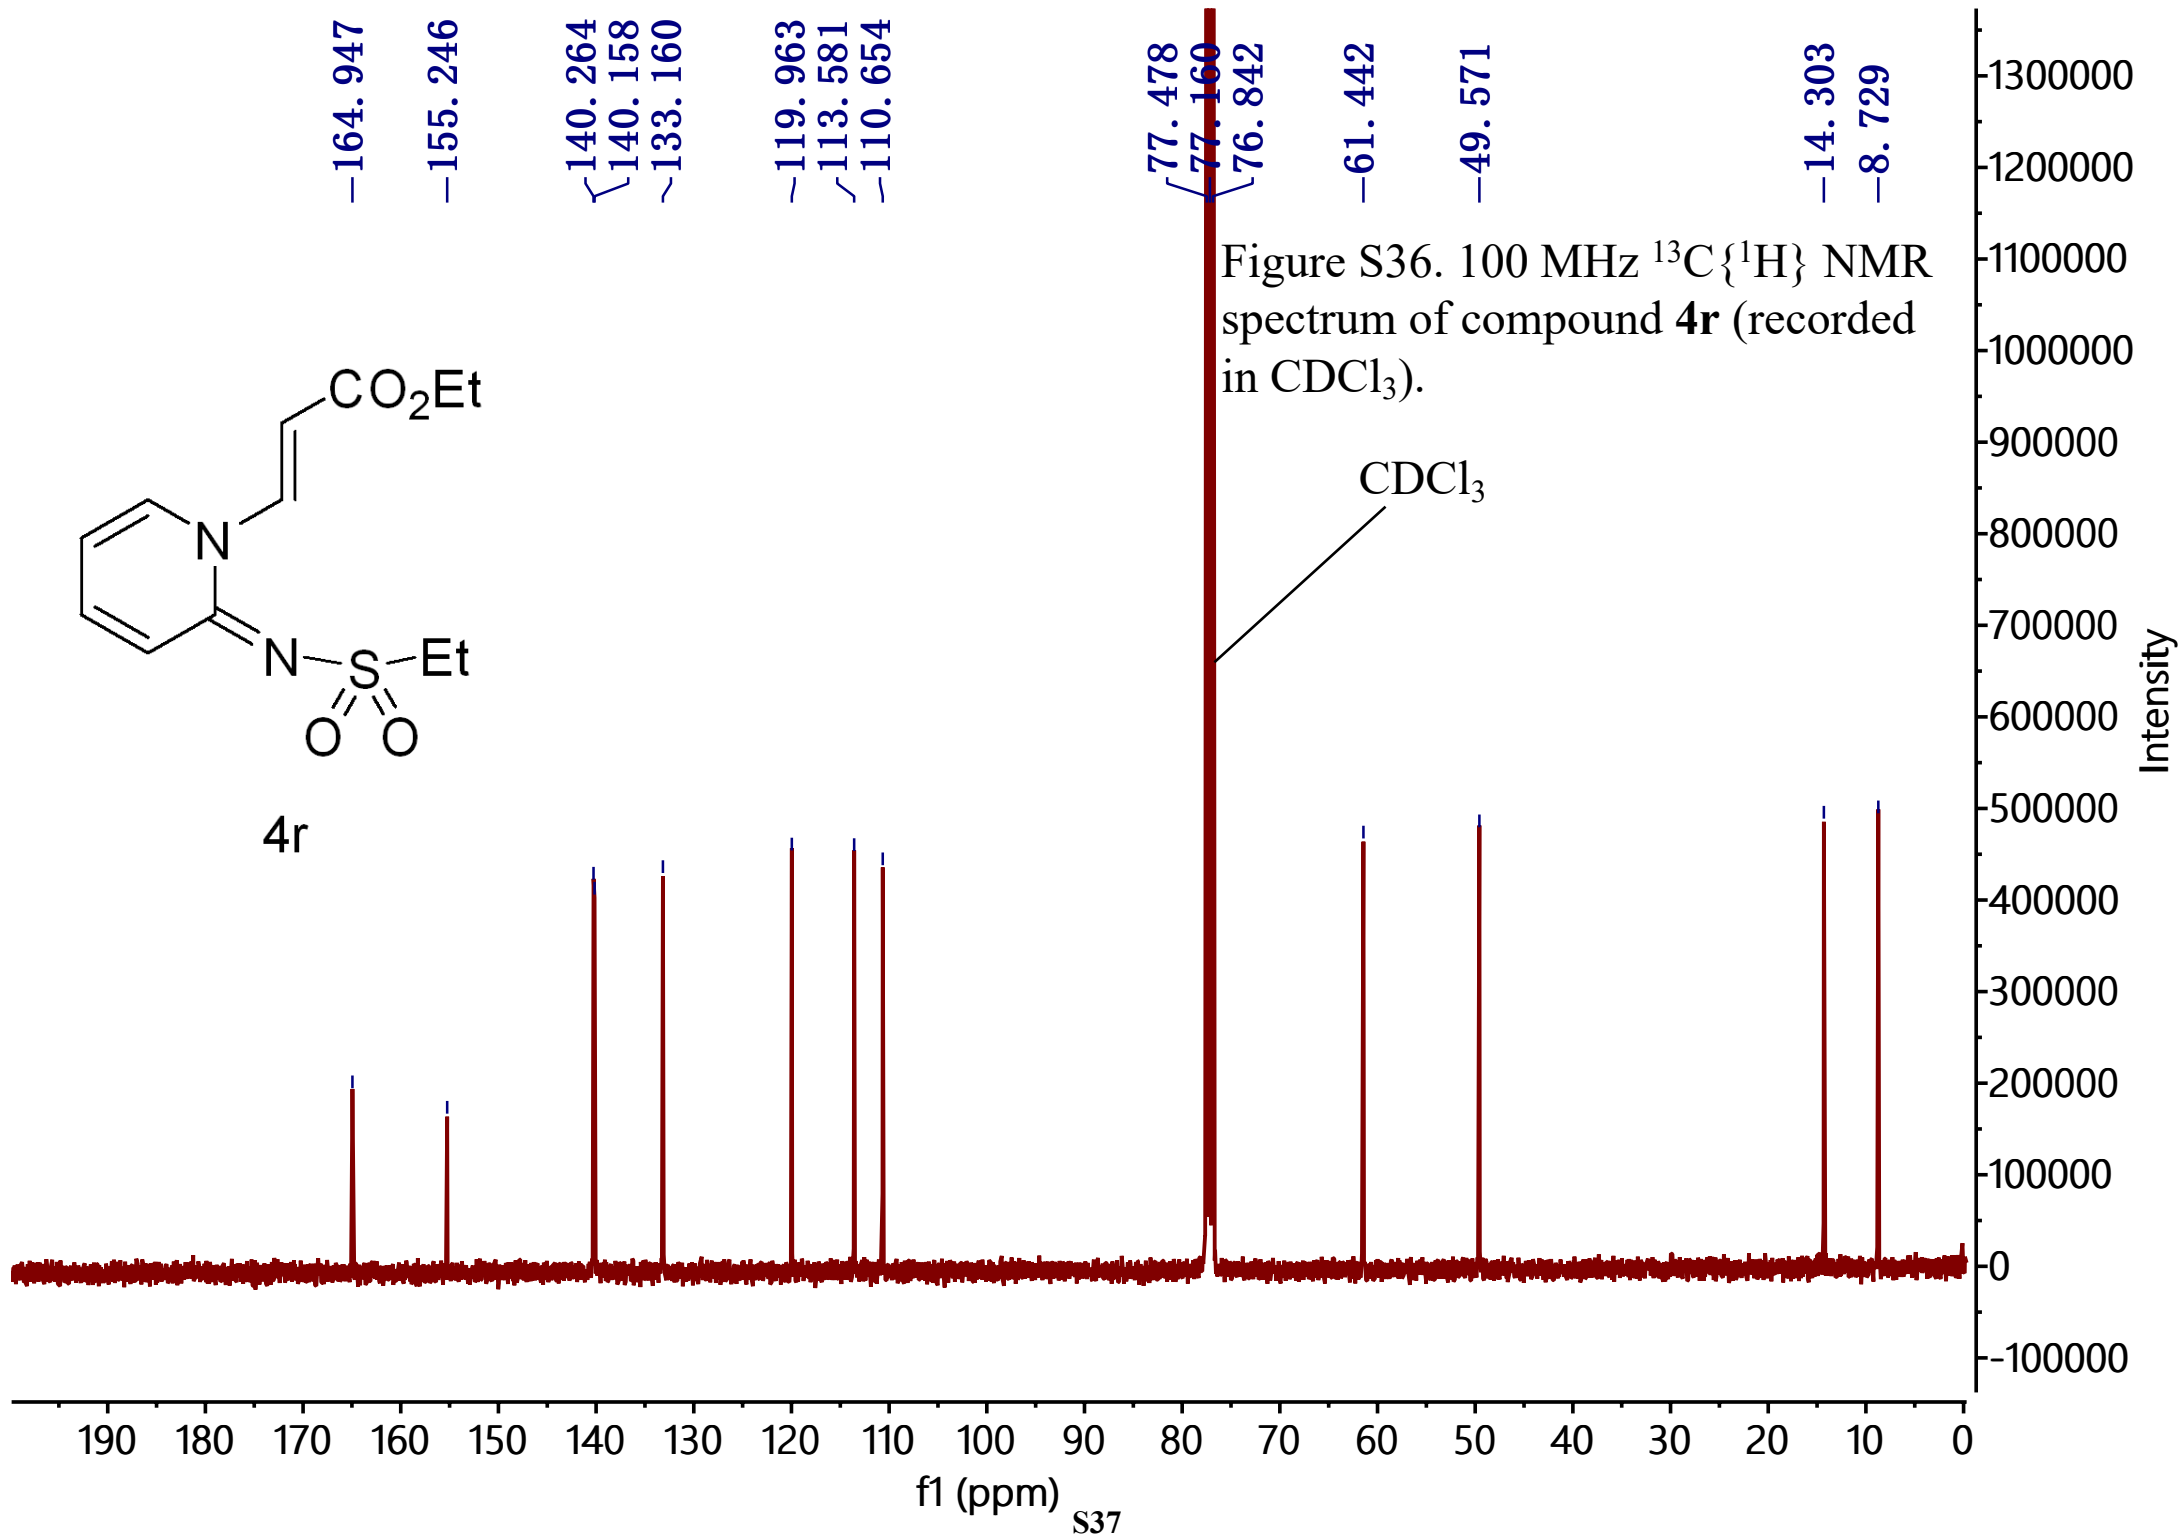

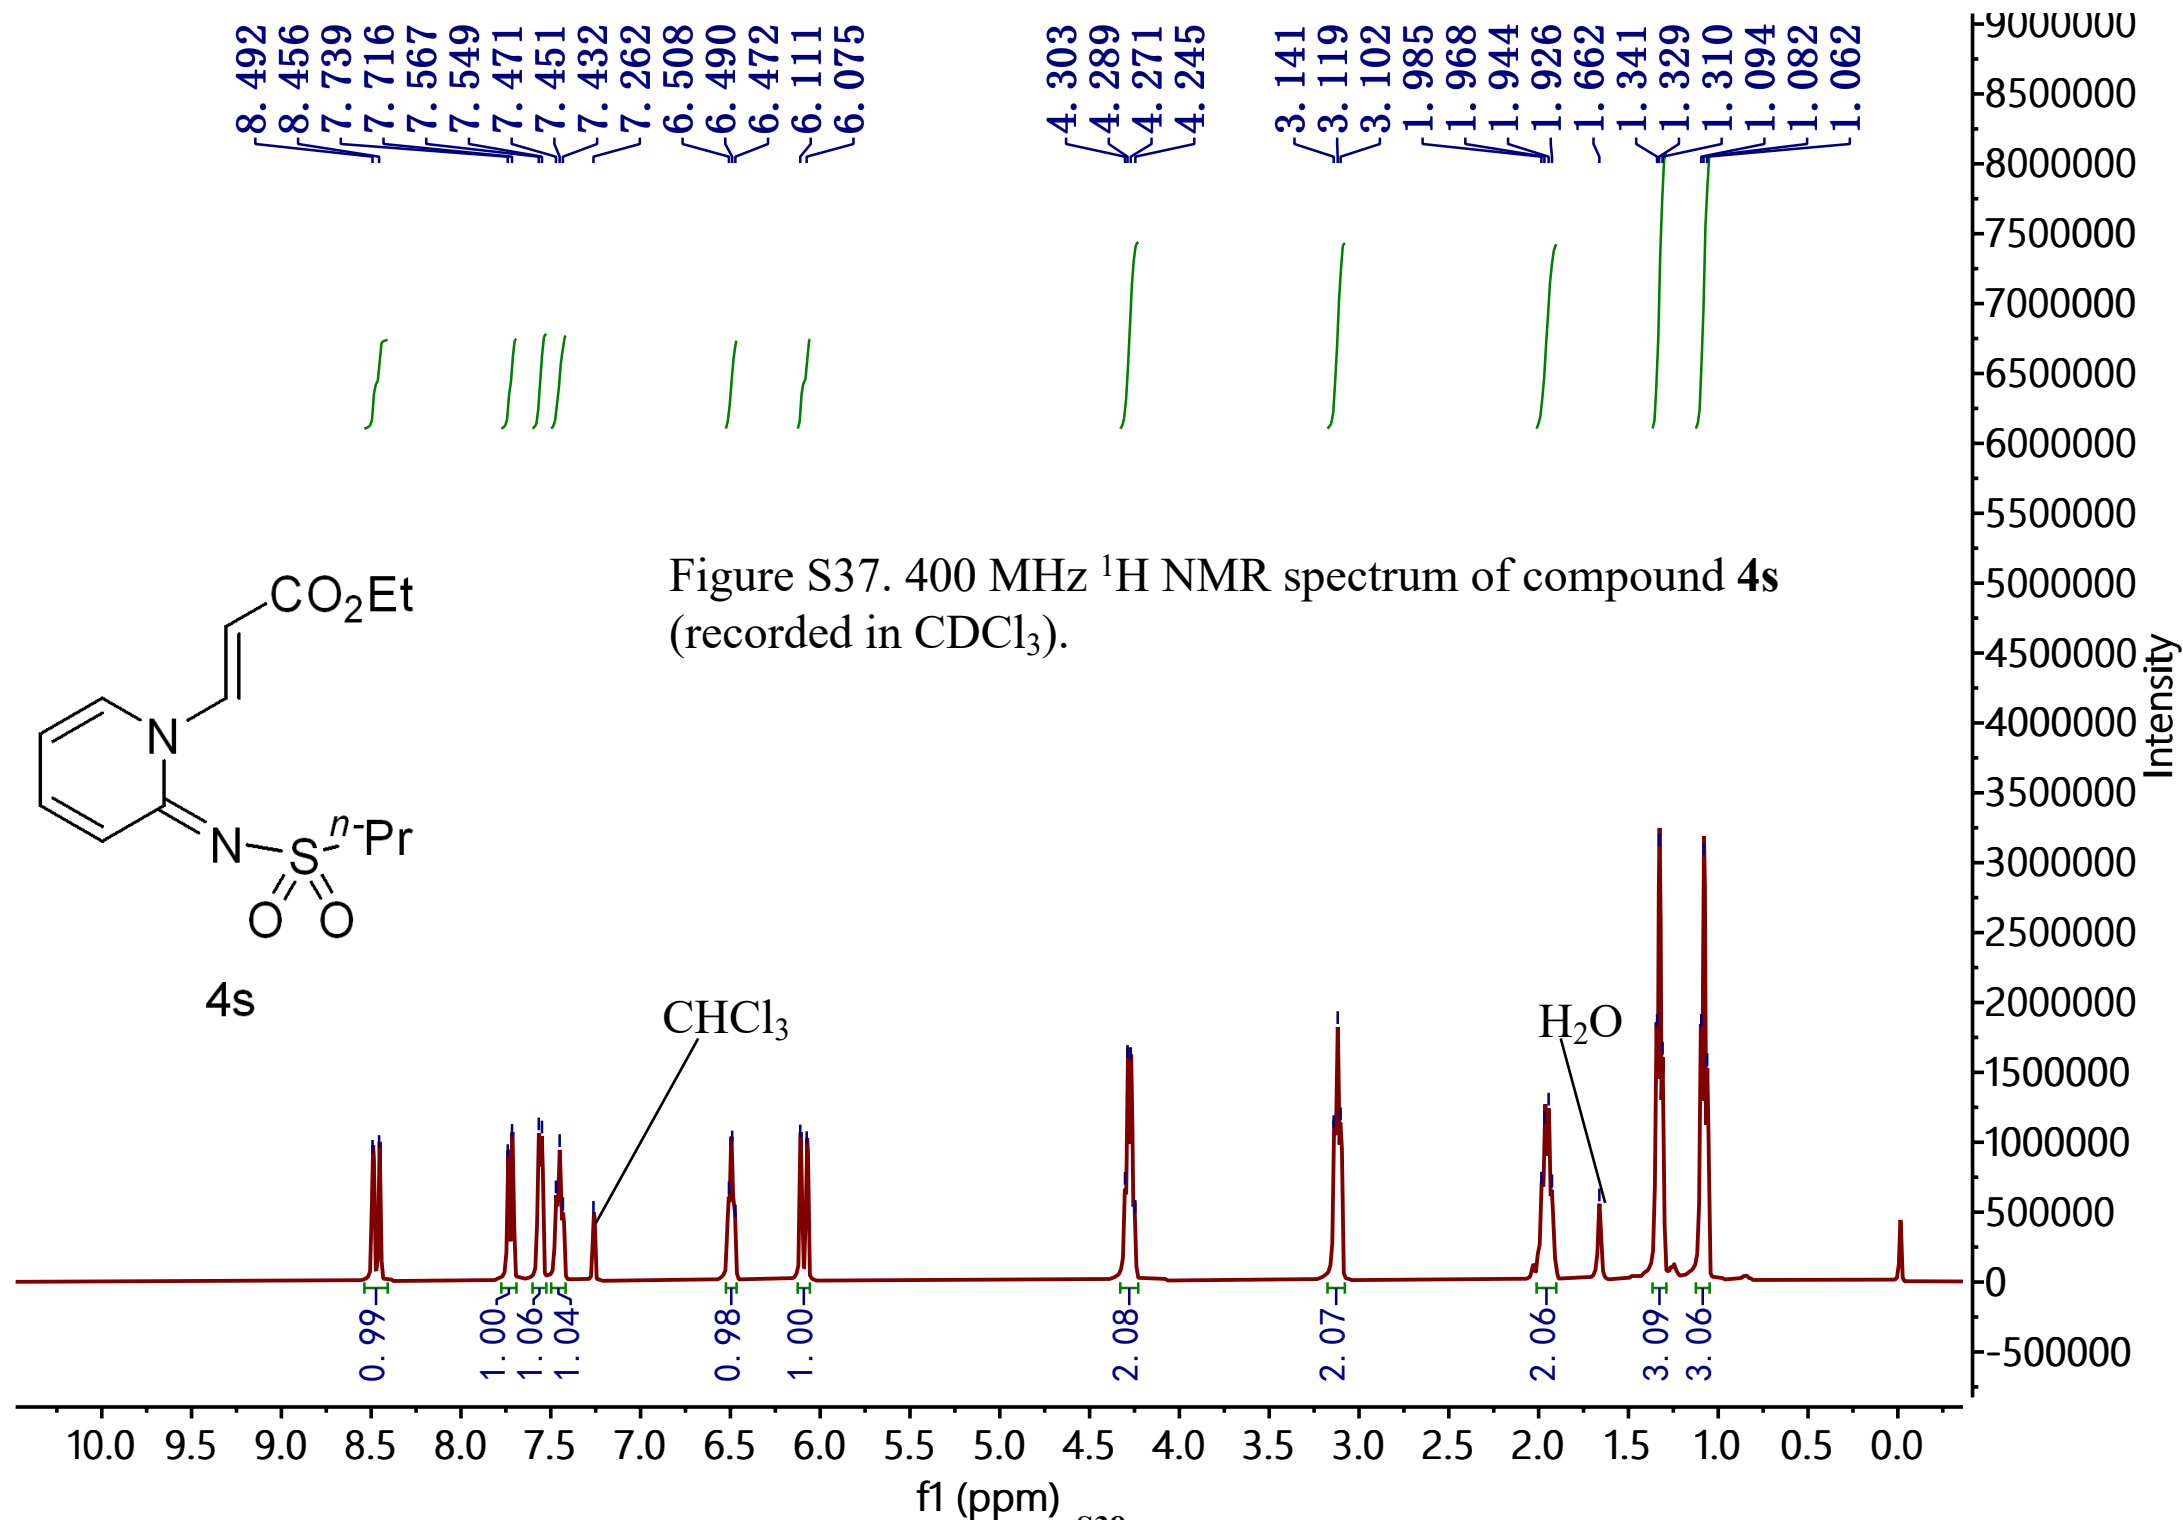

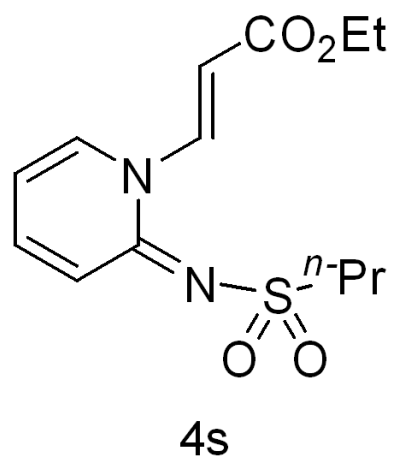

$\sim 164.934$   
 $\sim 155.135$   
 $\sim 140.232$   
 $\sim 140.154$   
 $\sim 133.135$   
 $\sim 119.944$   
 $\sim 113.524$   
 $\sim 110.626$   
 $\sim 77.478$   
 $\sim 77.160$   
 $\sim 76.842$   
 $\sim 61.417$   
 $\sim 56.982$   
 $\sim 17.721$   
 $\sim 14.289$   
 $\sim 13.225$

Figure S38. 100 MHz  $^{13}\text{C}\{^1\text{H}\}$  NMR spectrum of compound **4s** (recorded in  $\text{CDCl}_3$ ).

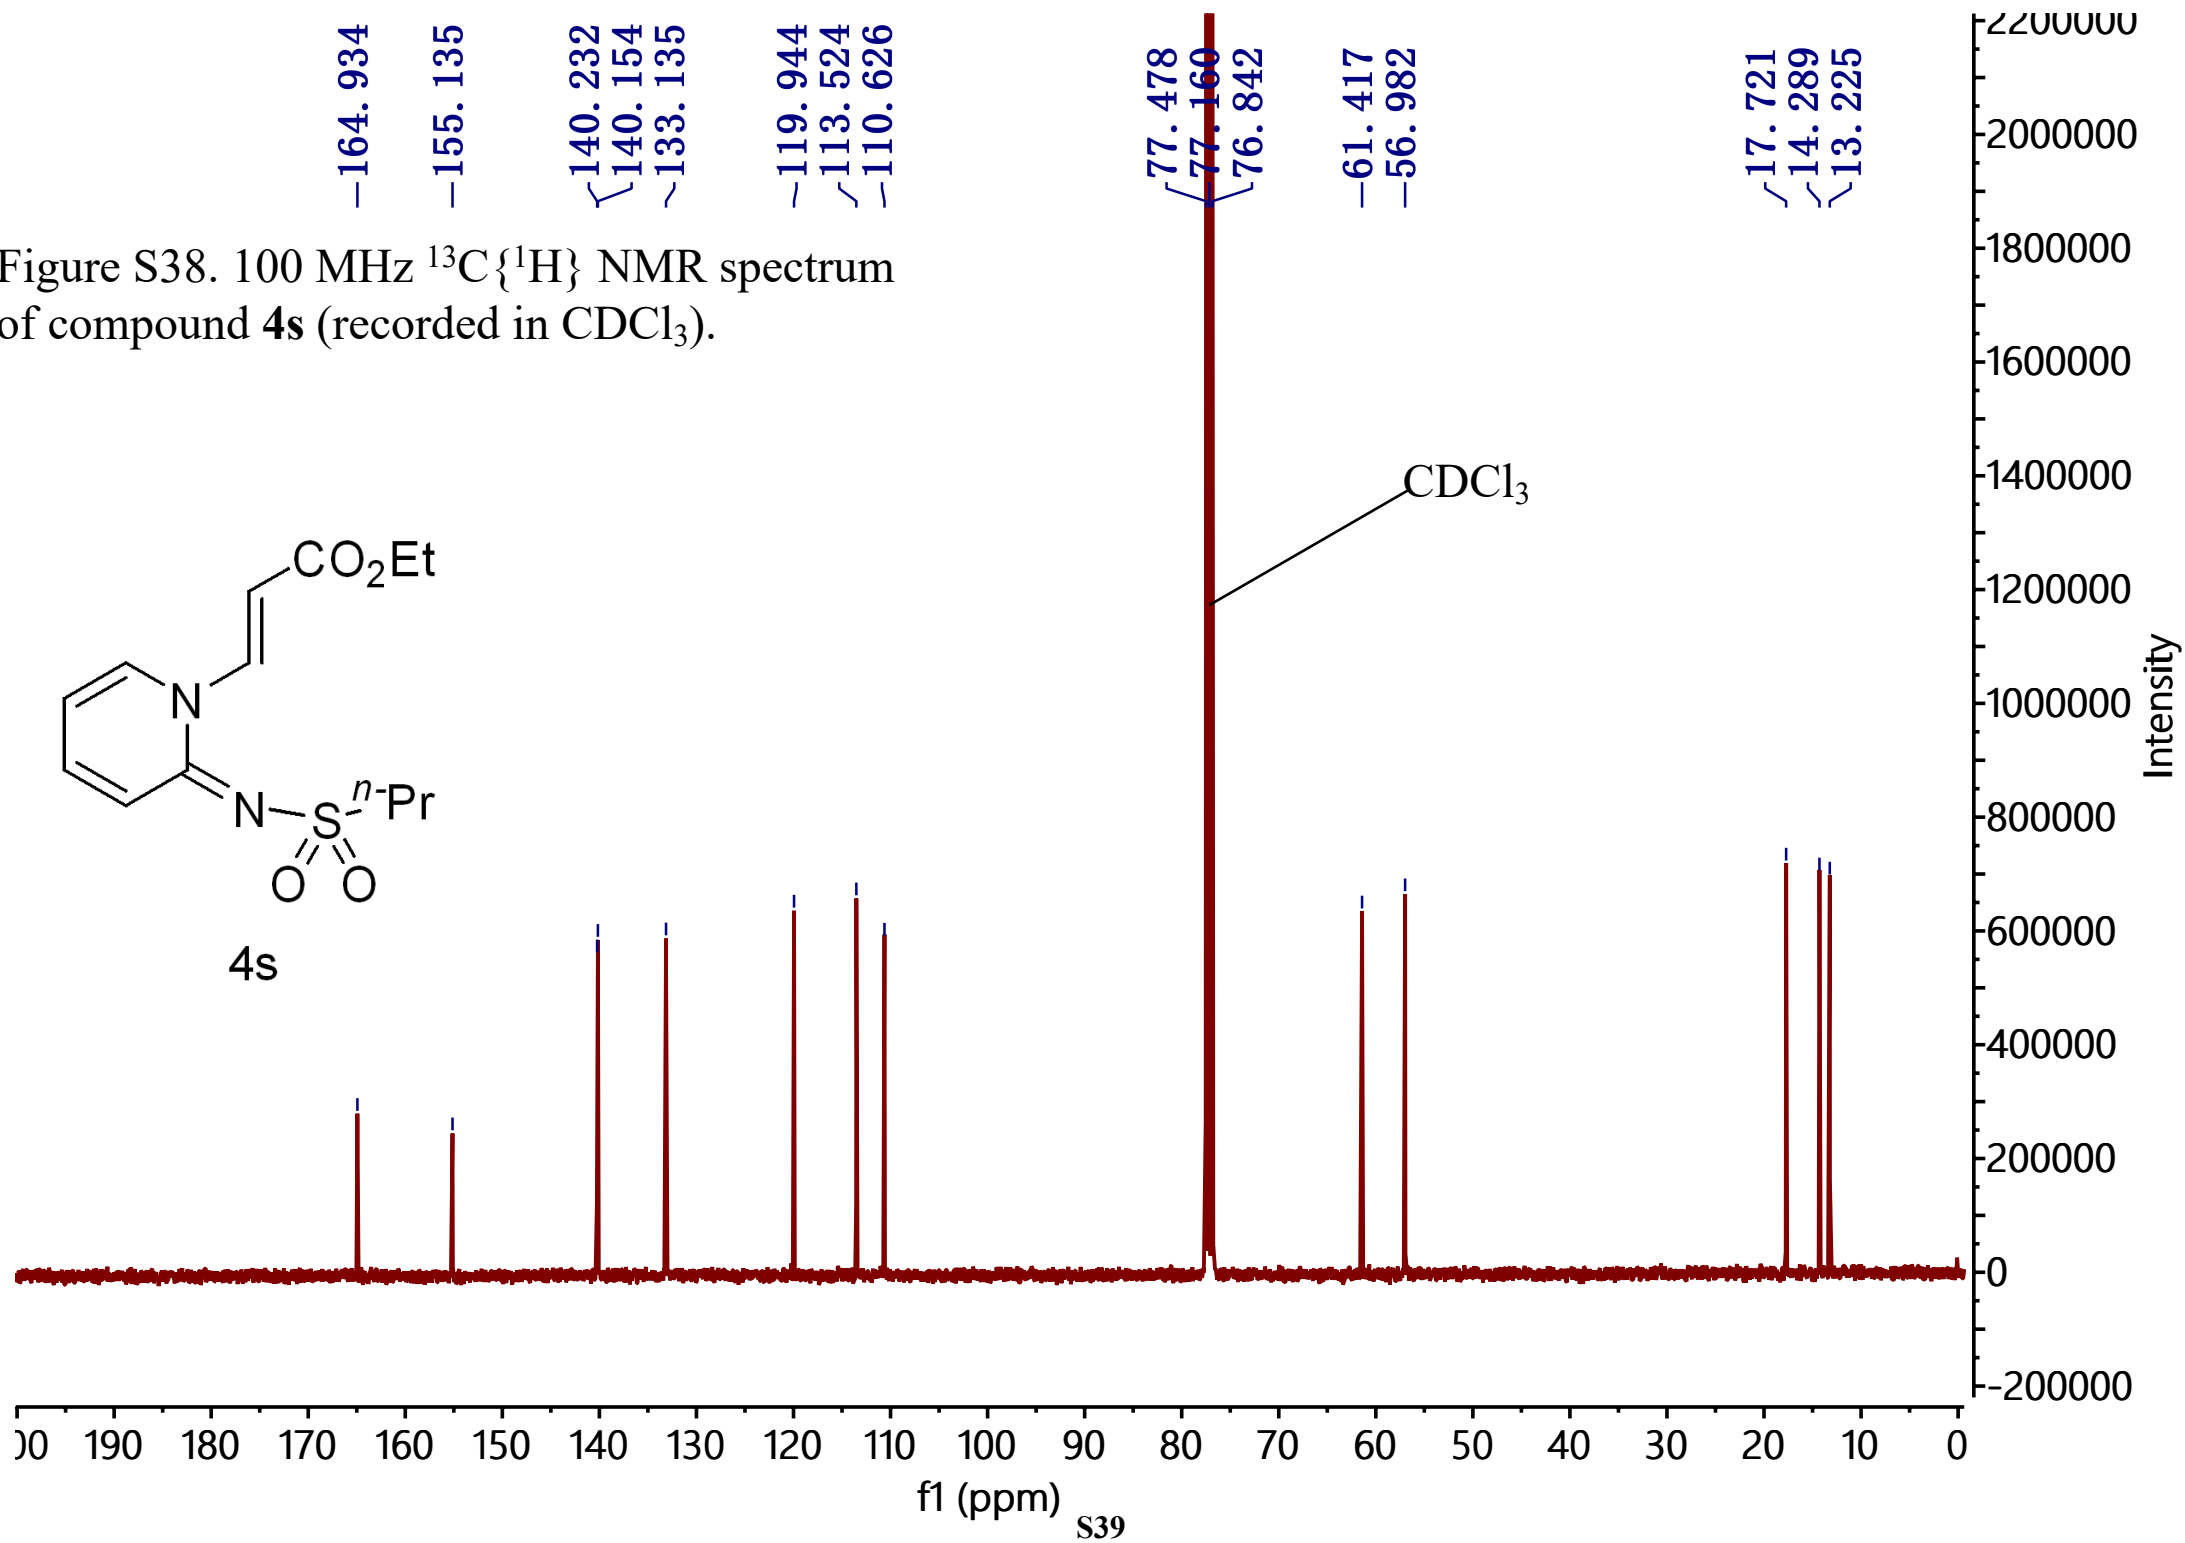

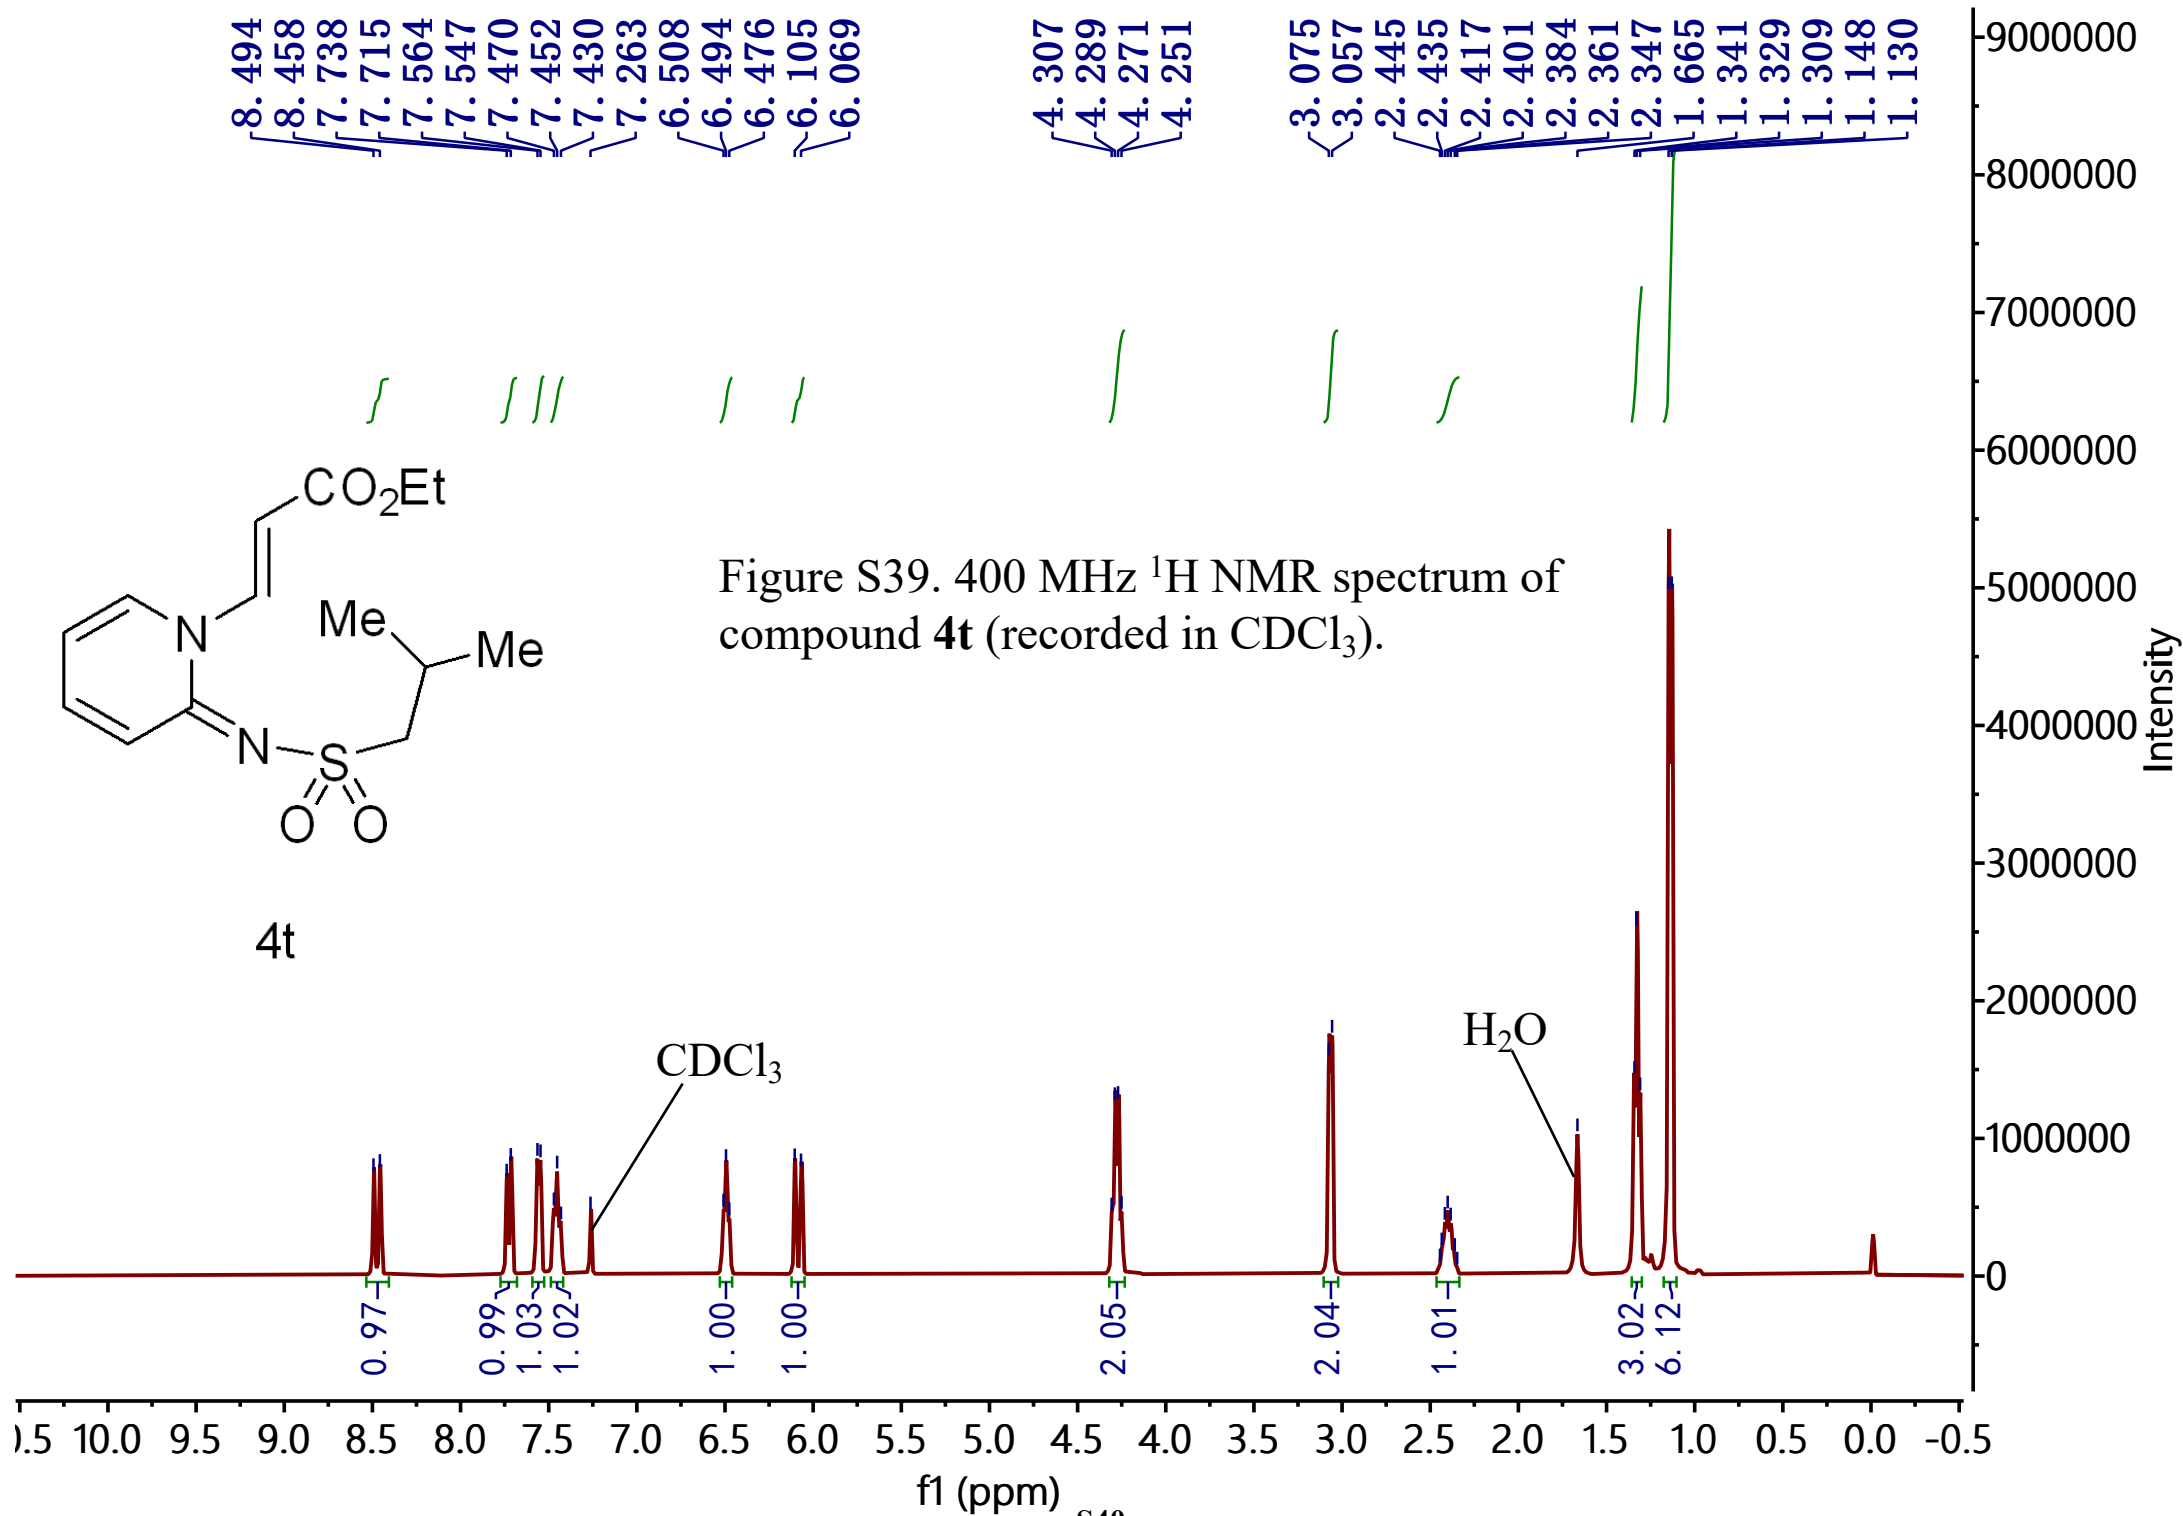



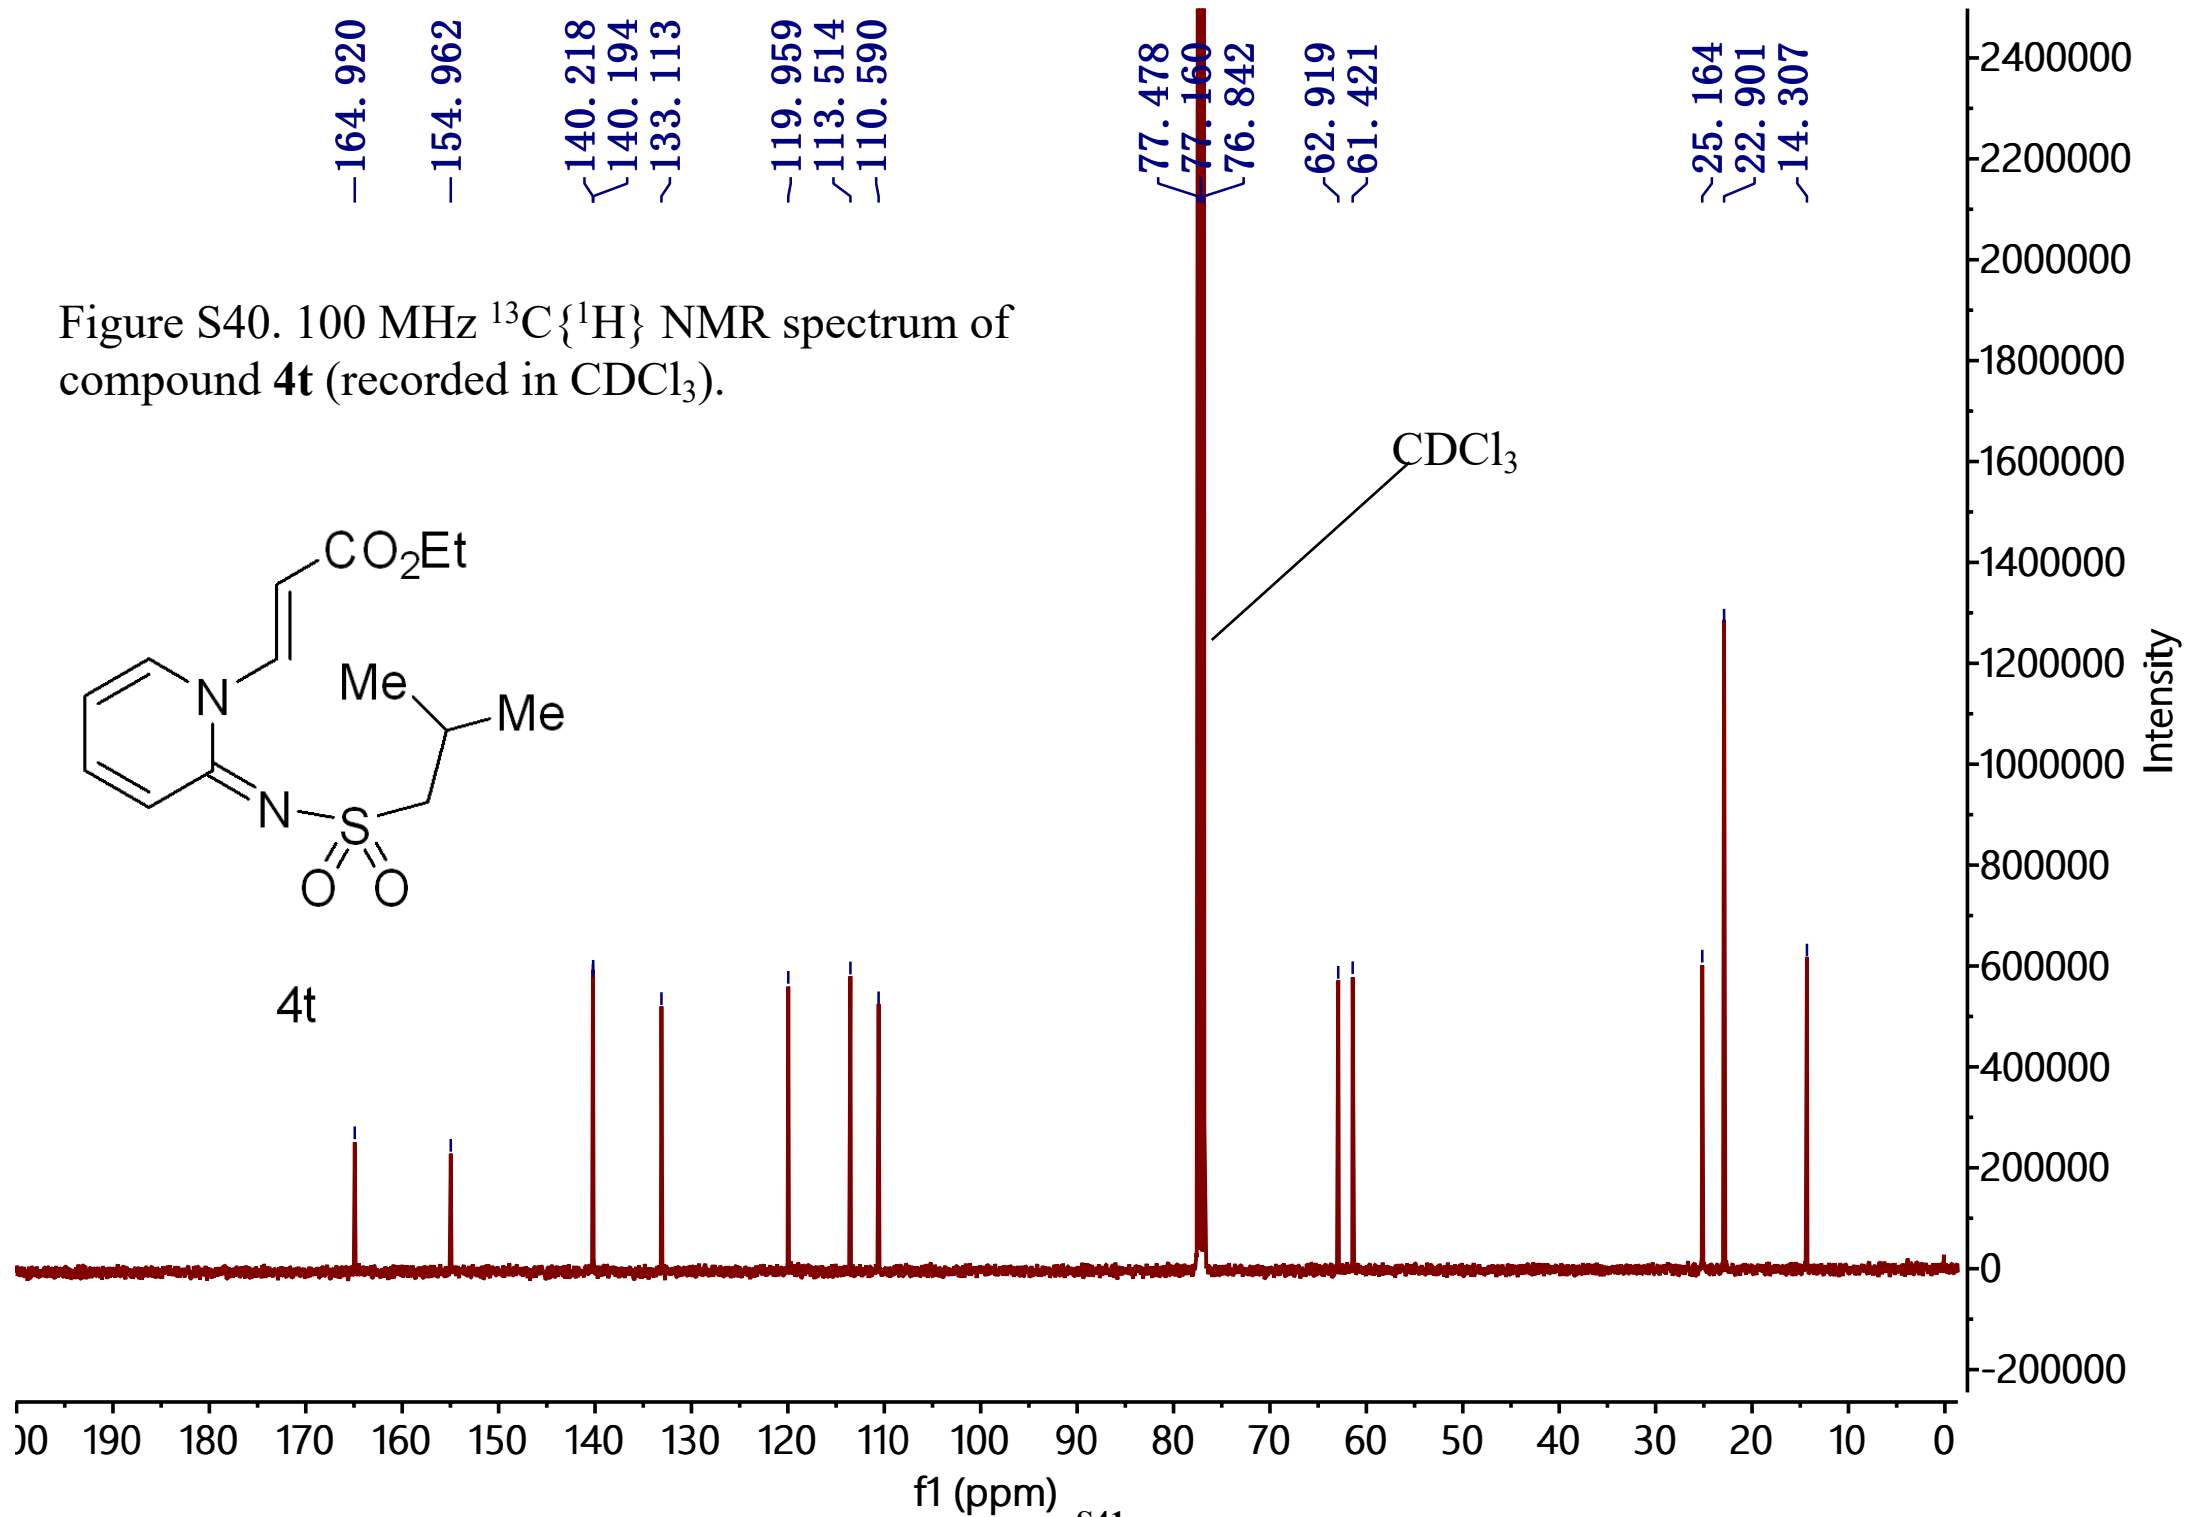

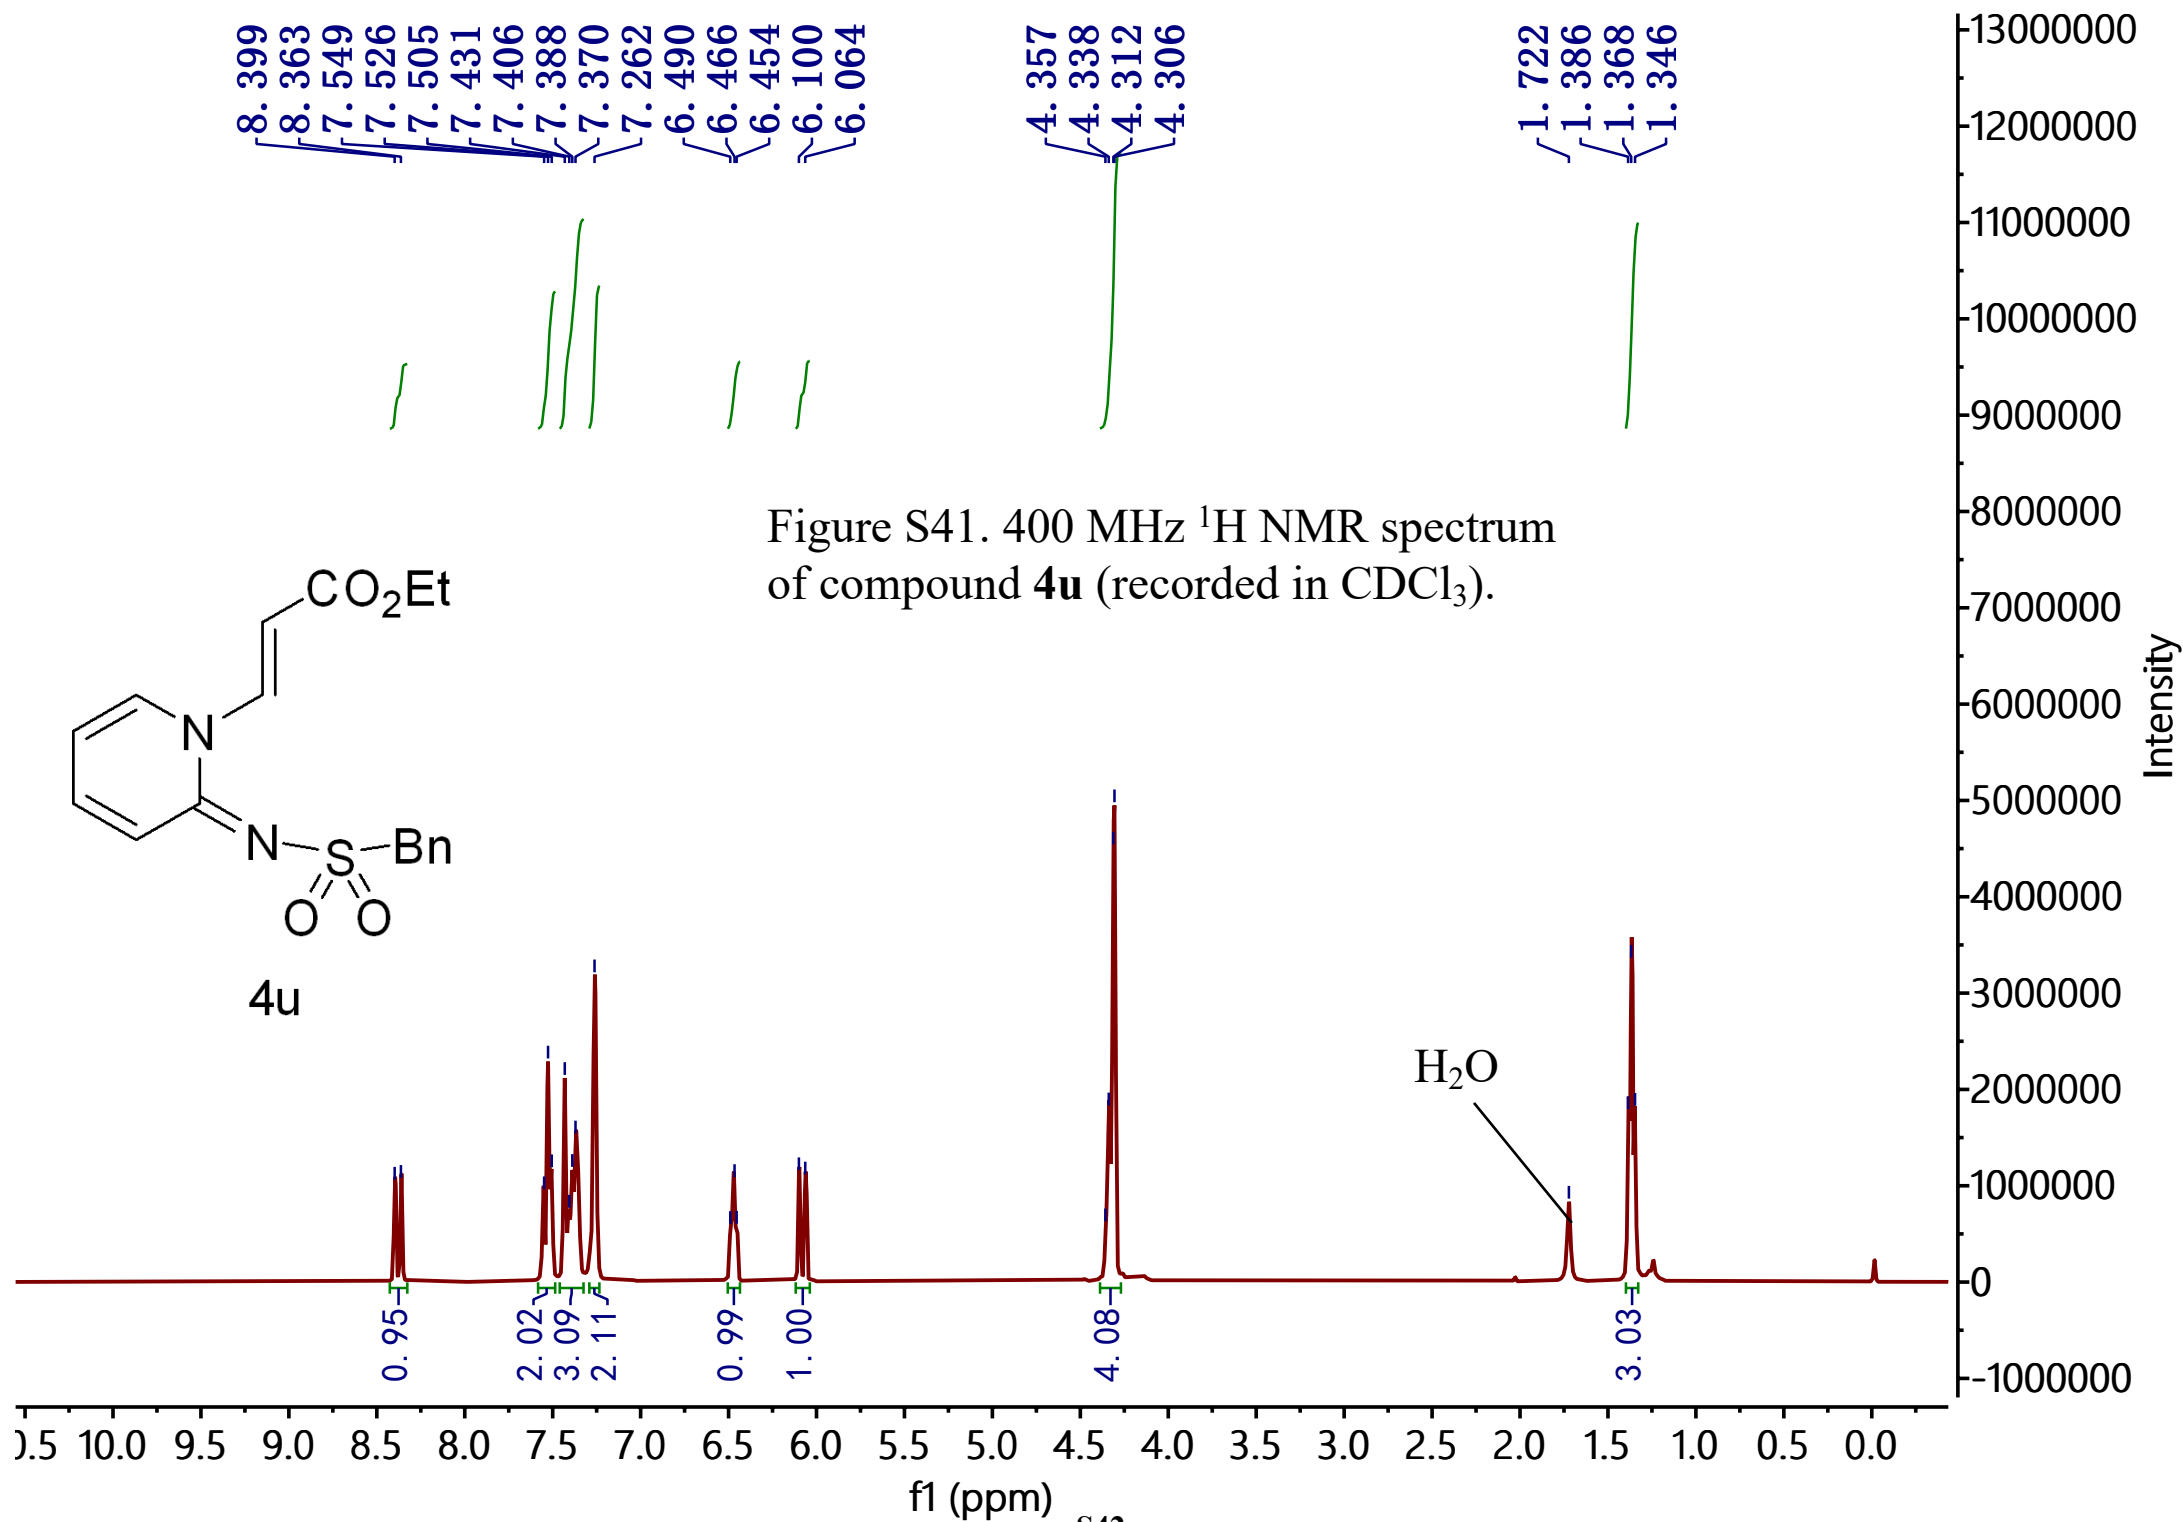

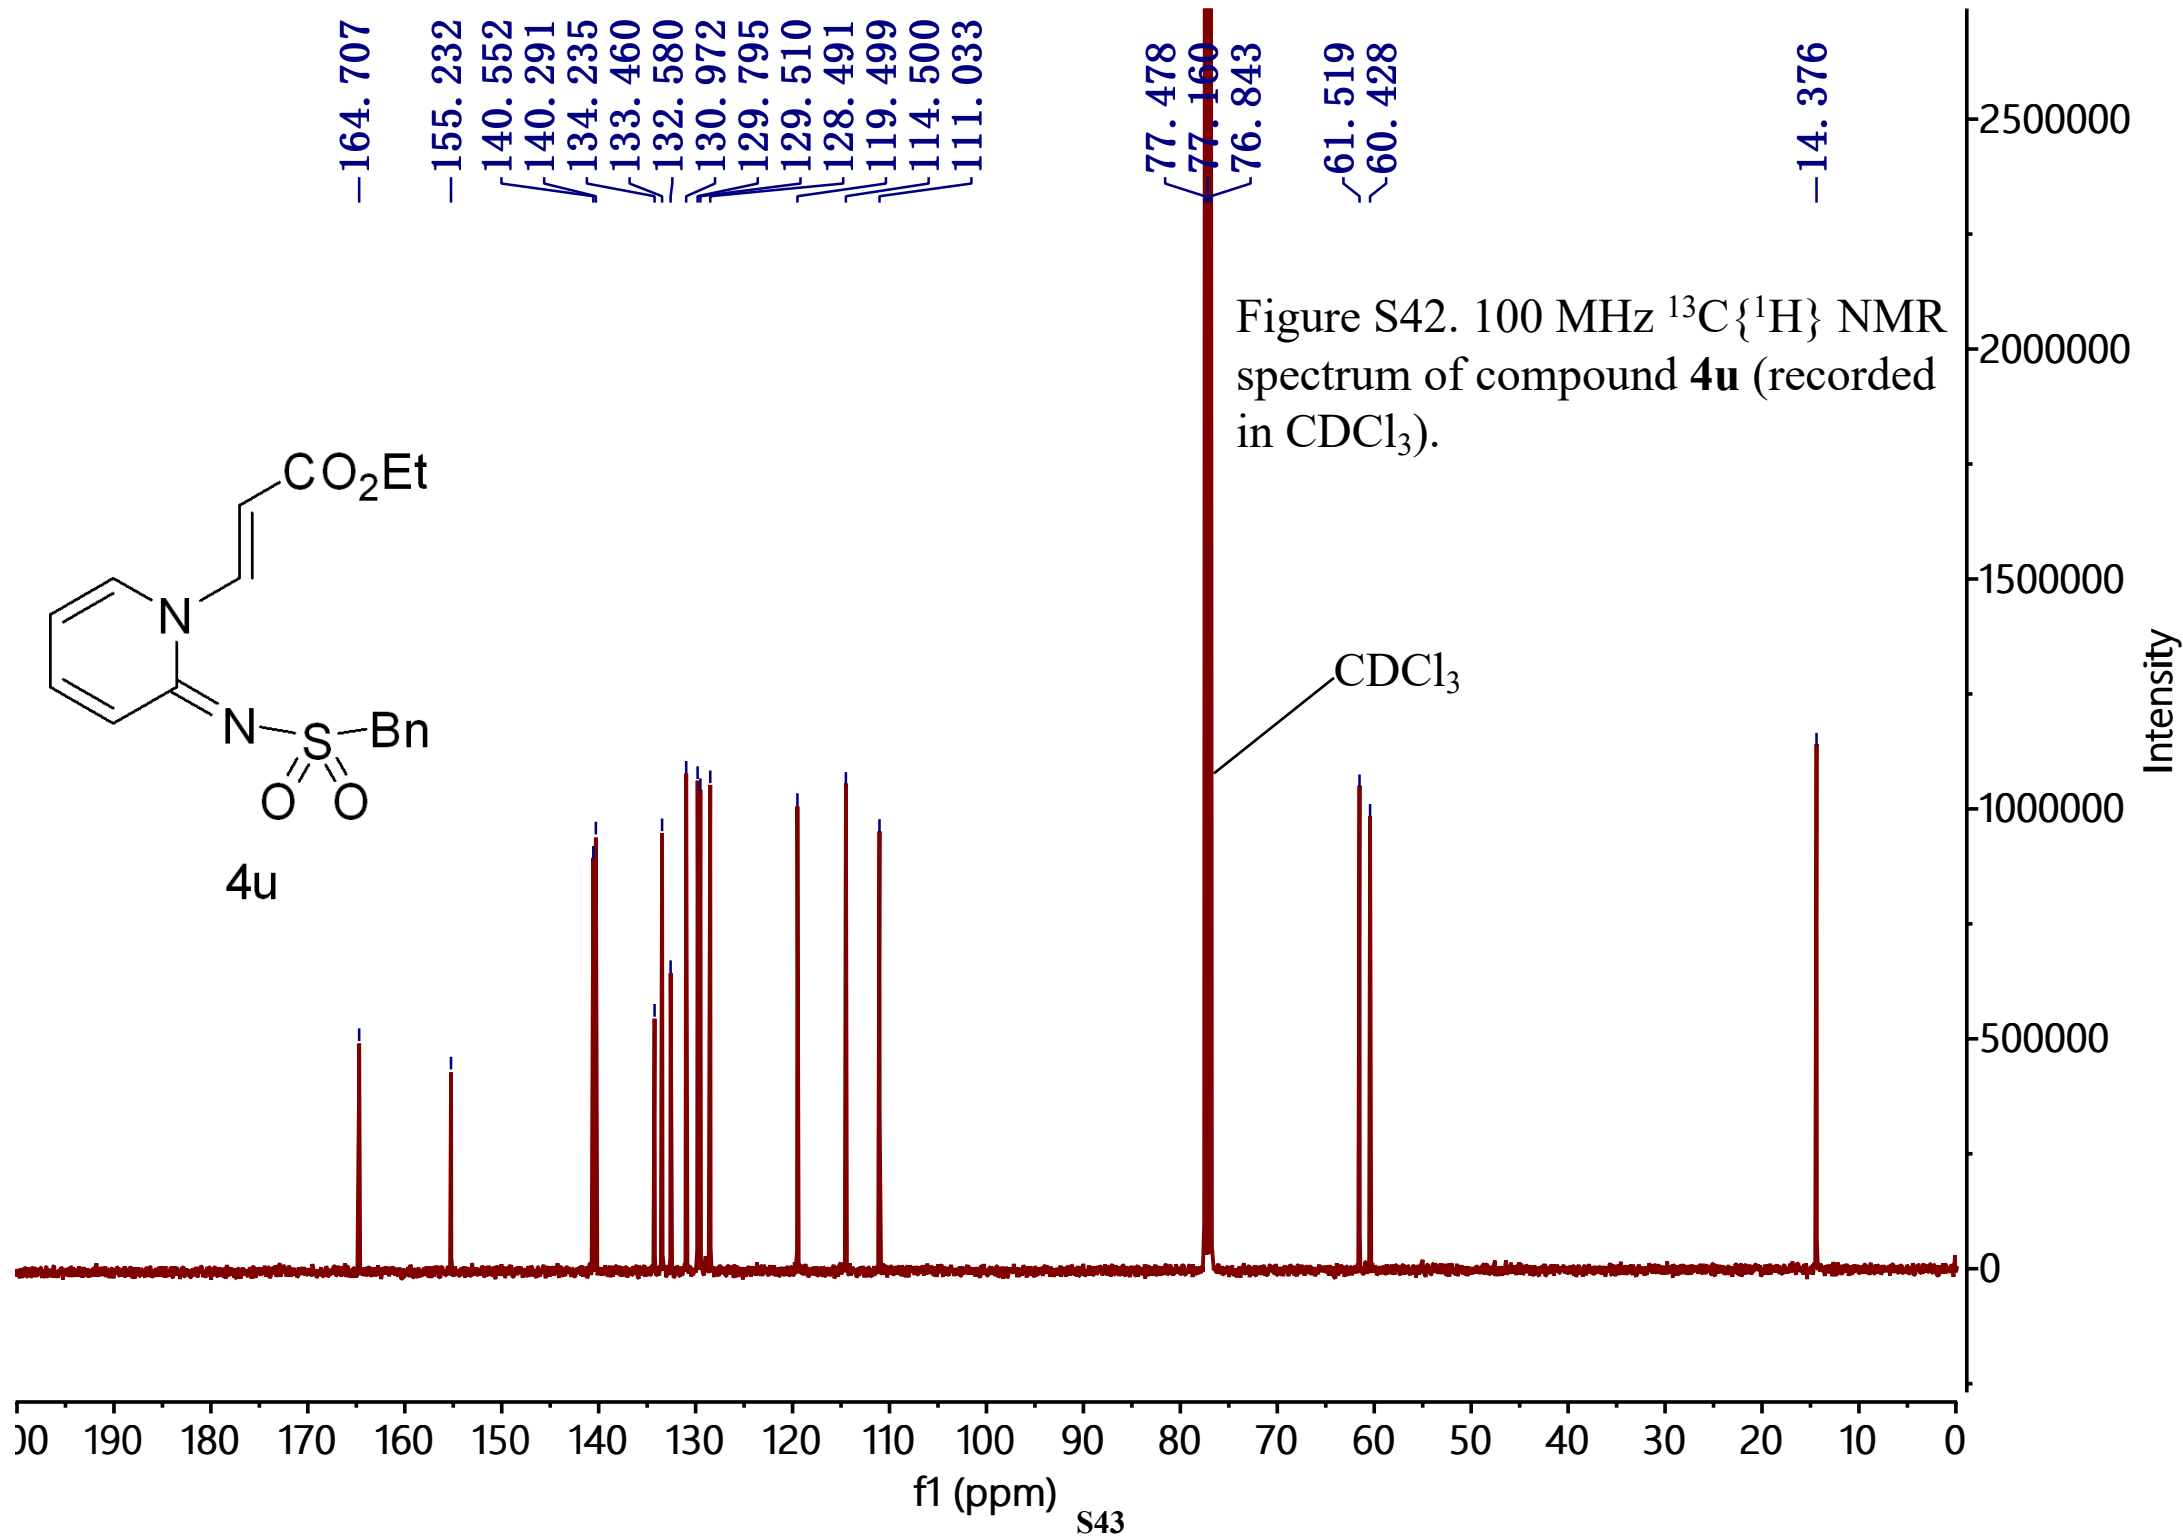

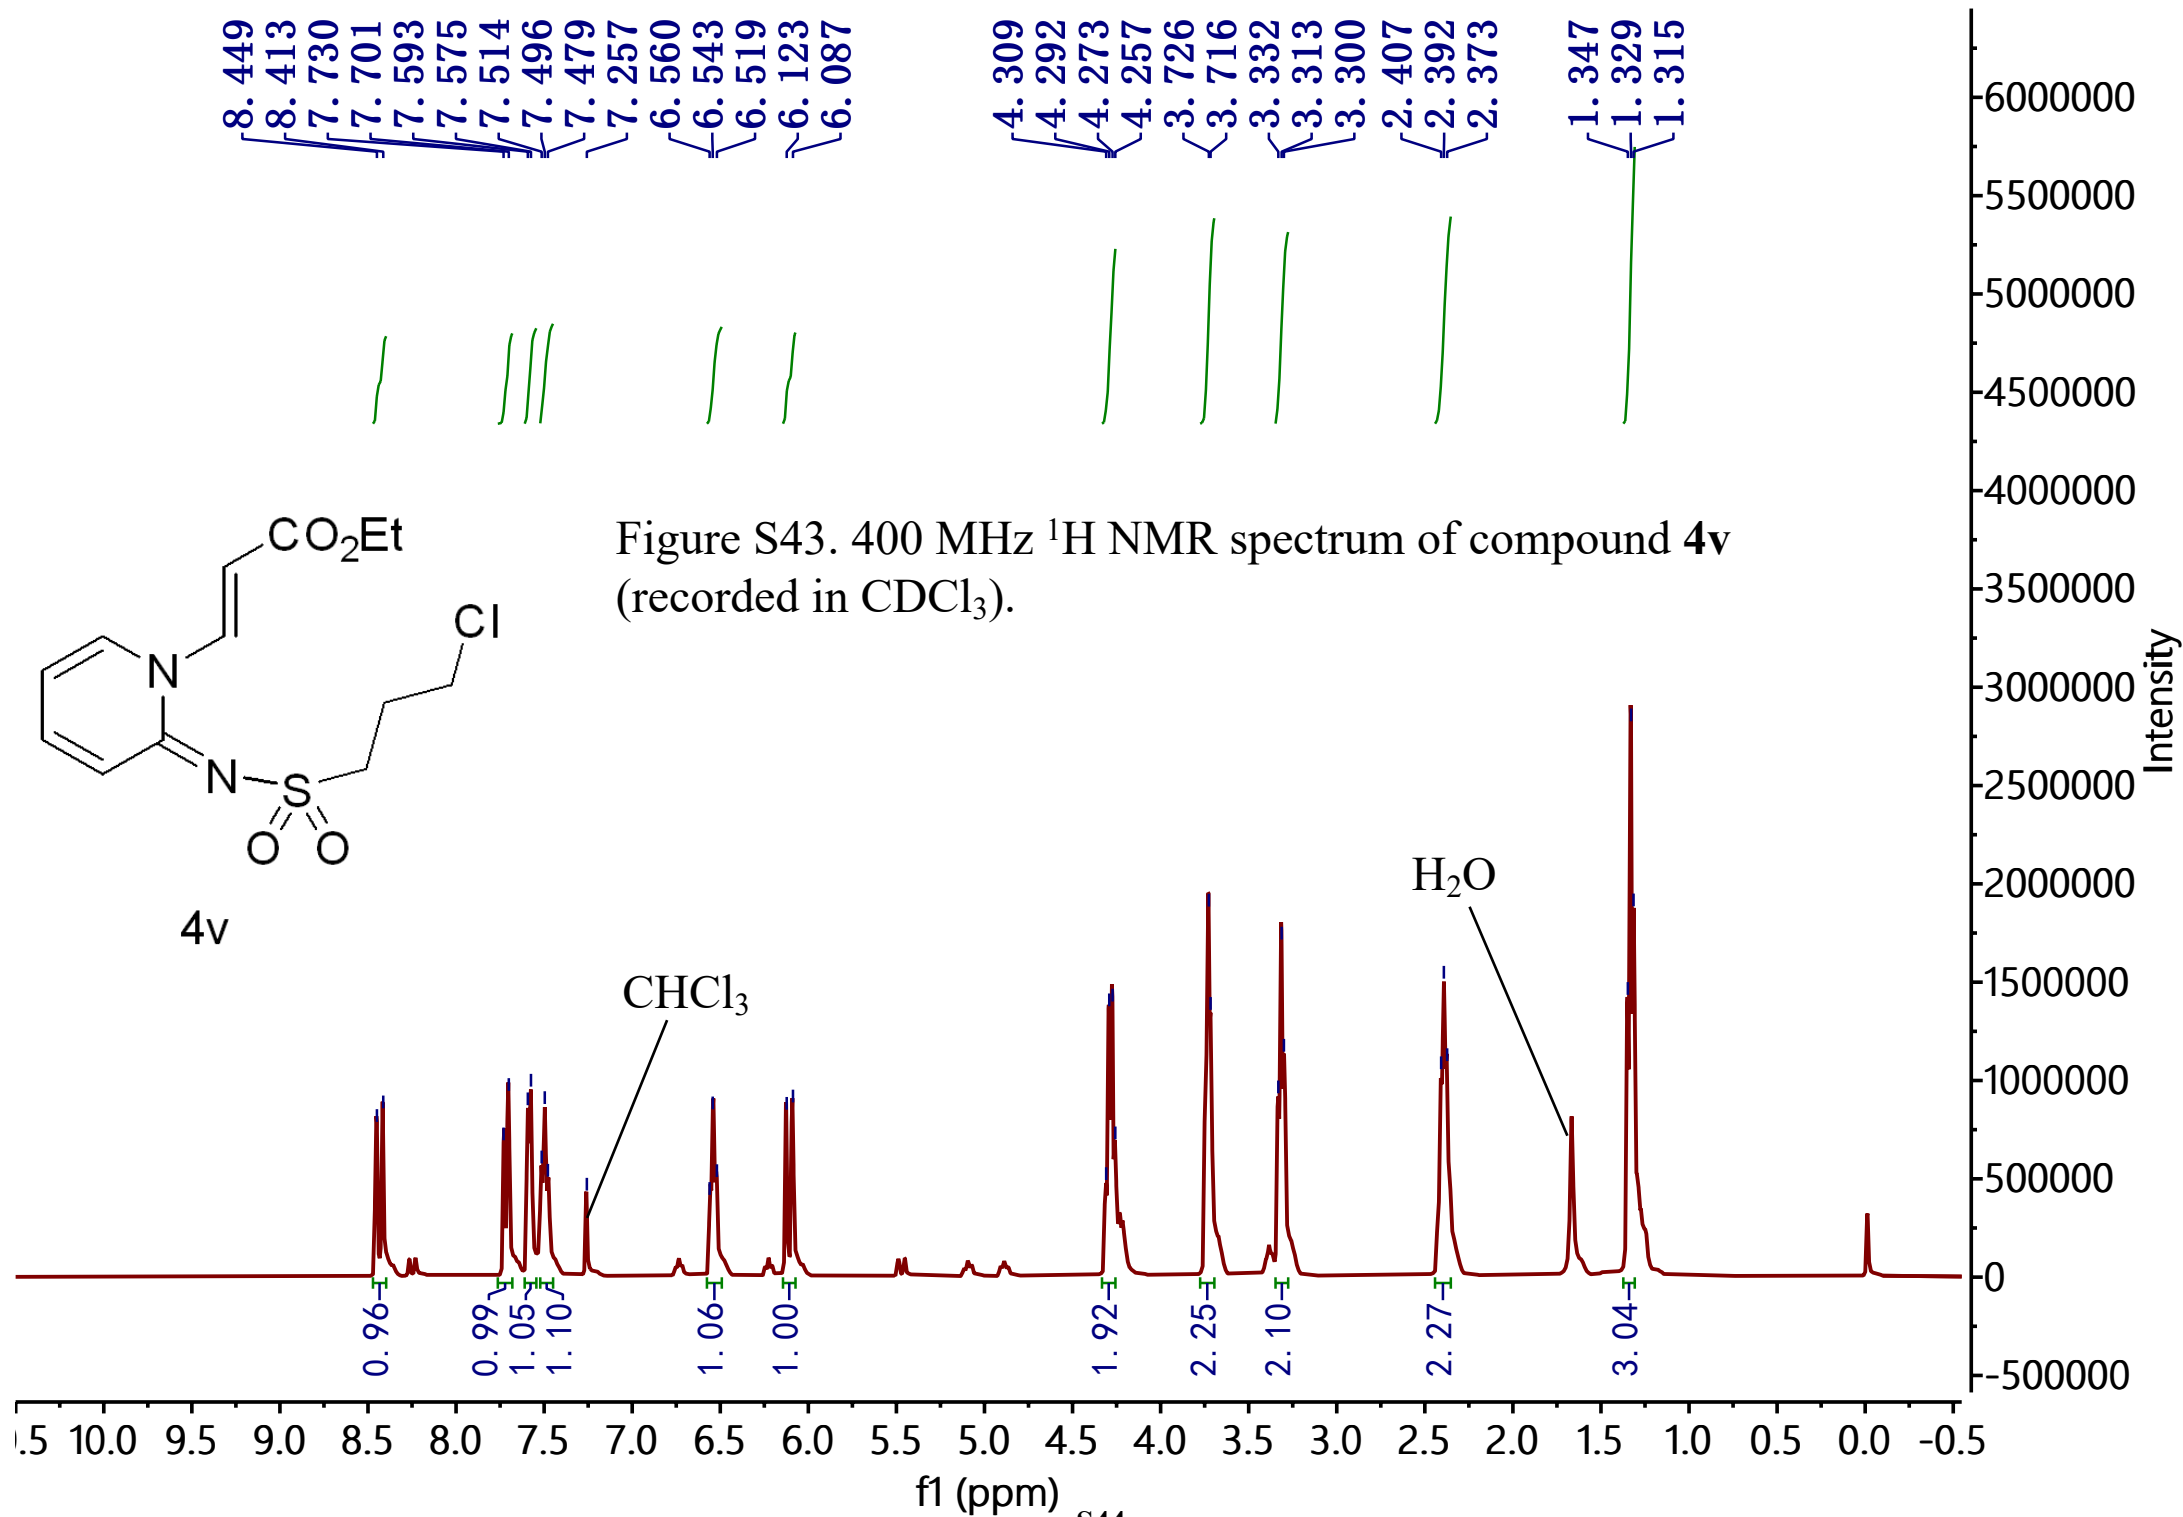

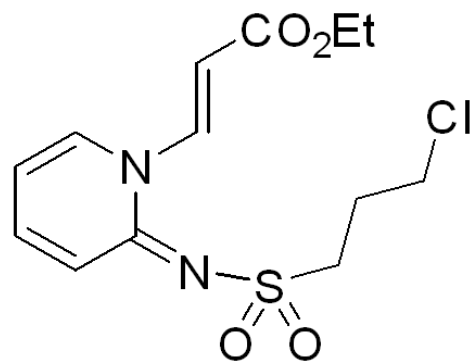

4v

-164.753  
 -155.166  
 -140.628  
 -140.102  
 -133.443  
 -119.799  
 -114.270  
 -110.952  
 77.477  
 77.160  
 76.842  
 -61.525  
 -52.217  
 -43.251  
 -27.488  
 -14.311

Figure S44. 100 MHz  $^{13}\text{C}\{^1\text{H}\}$  NMR spectrum of compound **4v** (recorded in  $\text{CDCl}_3$ ).

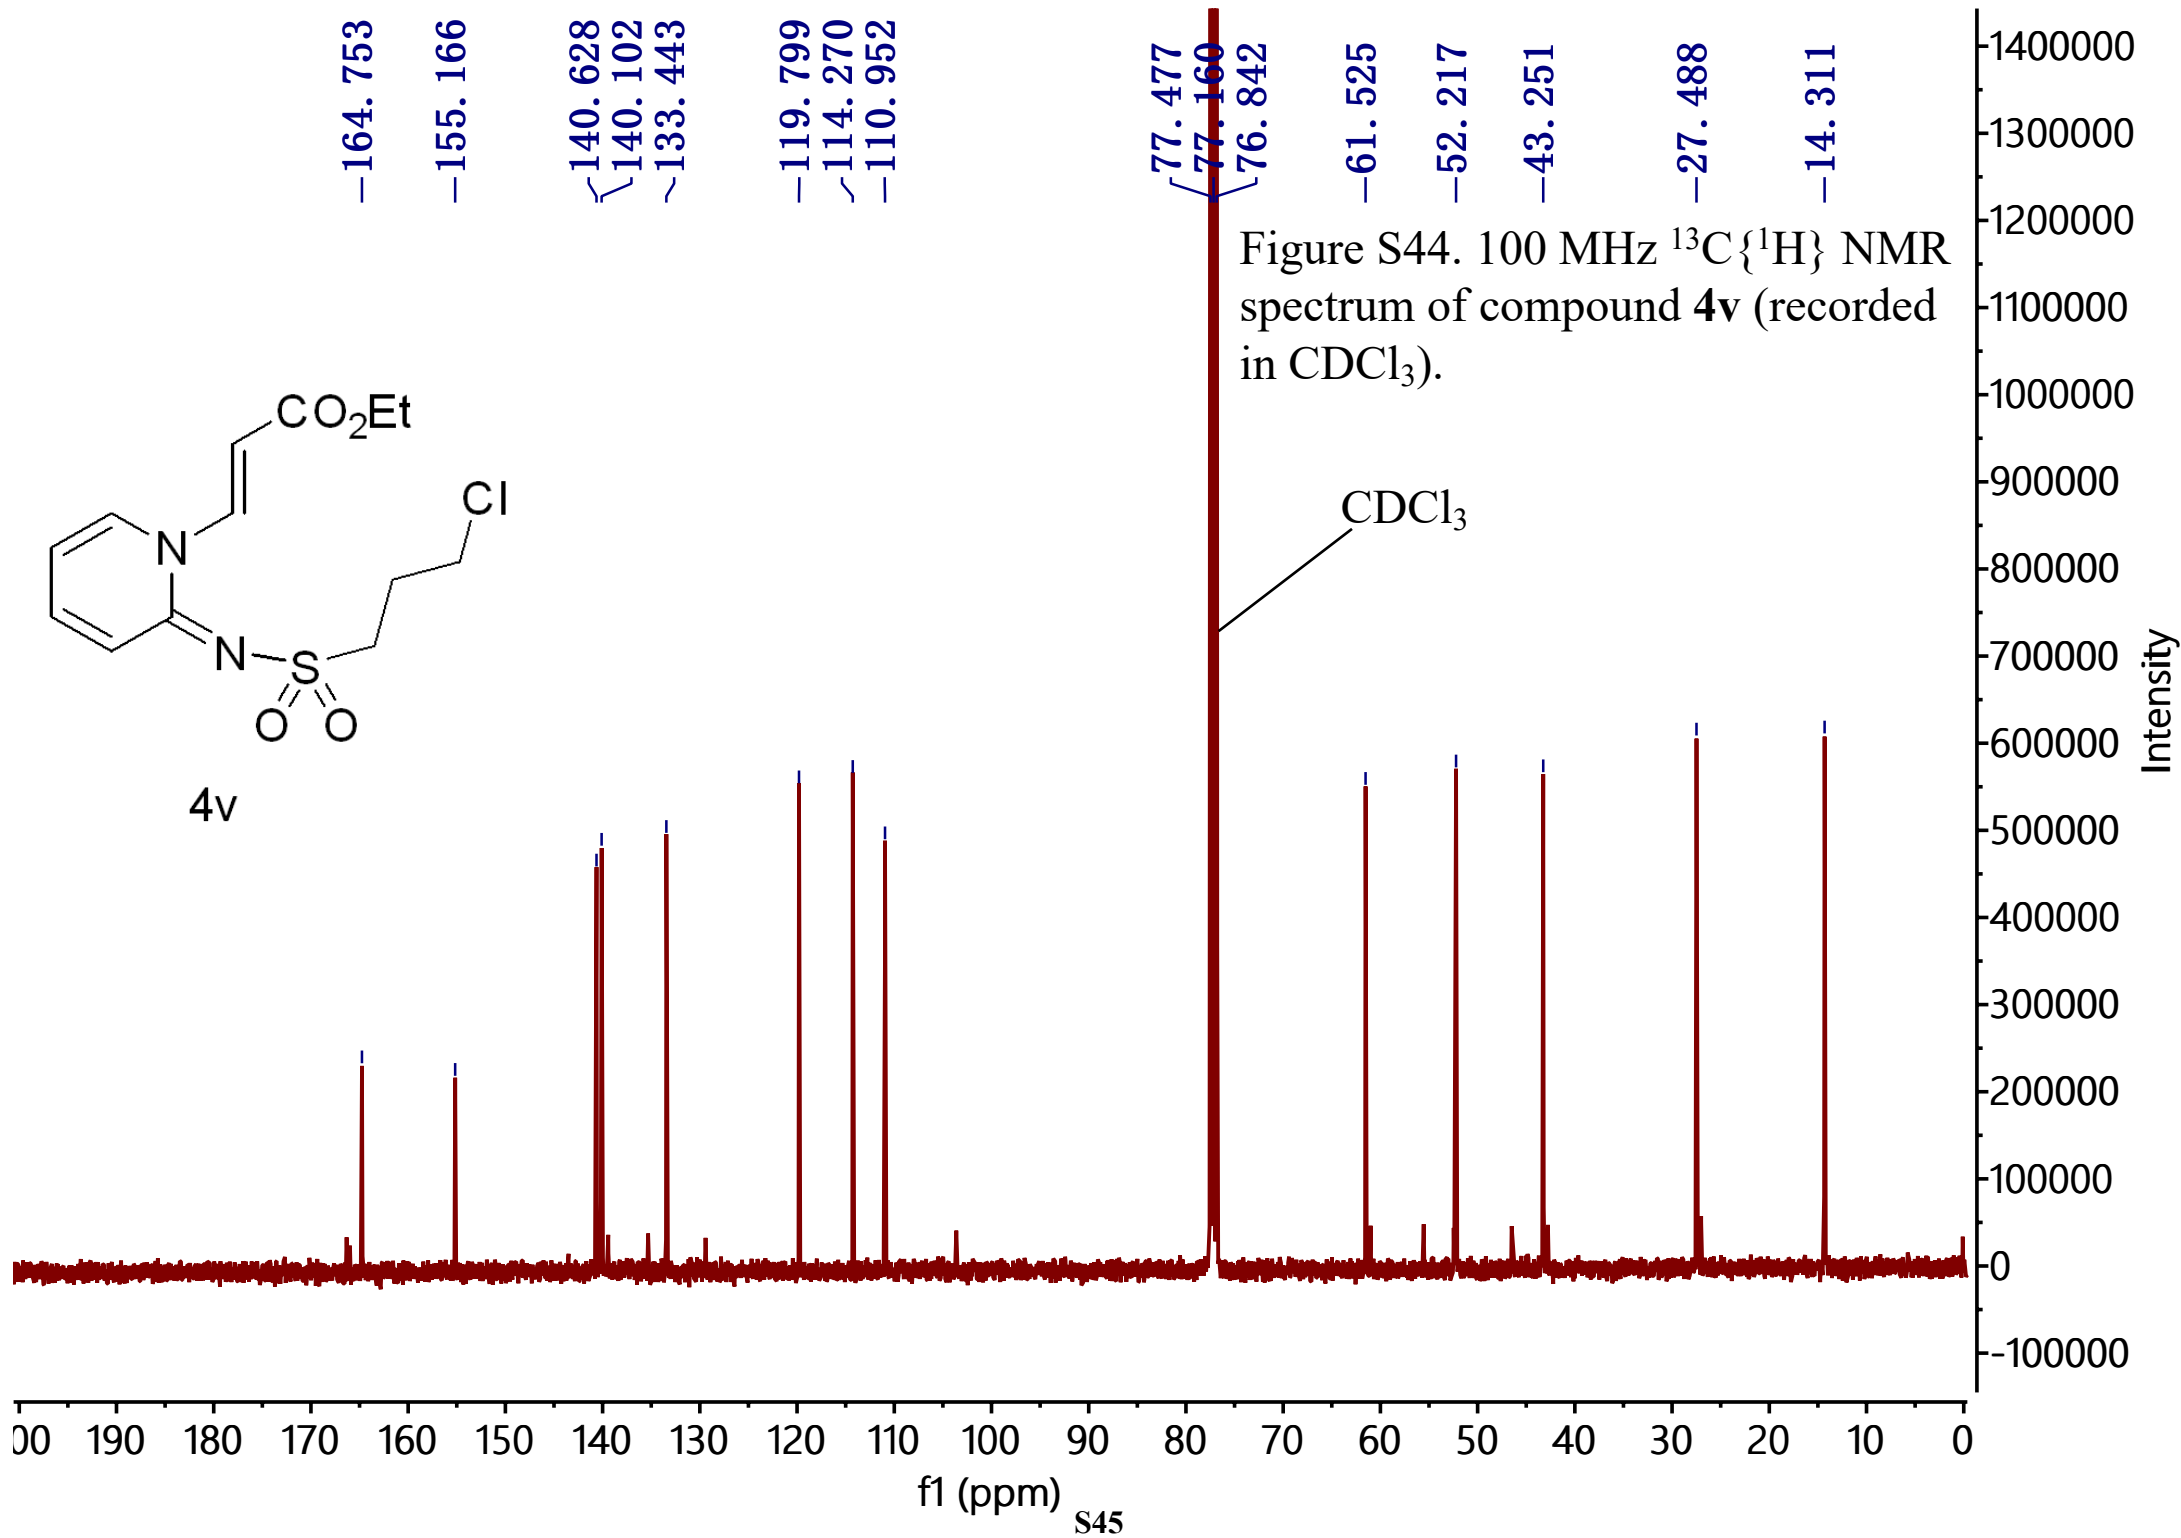

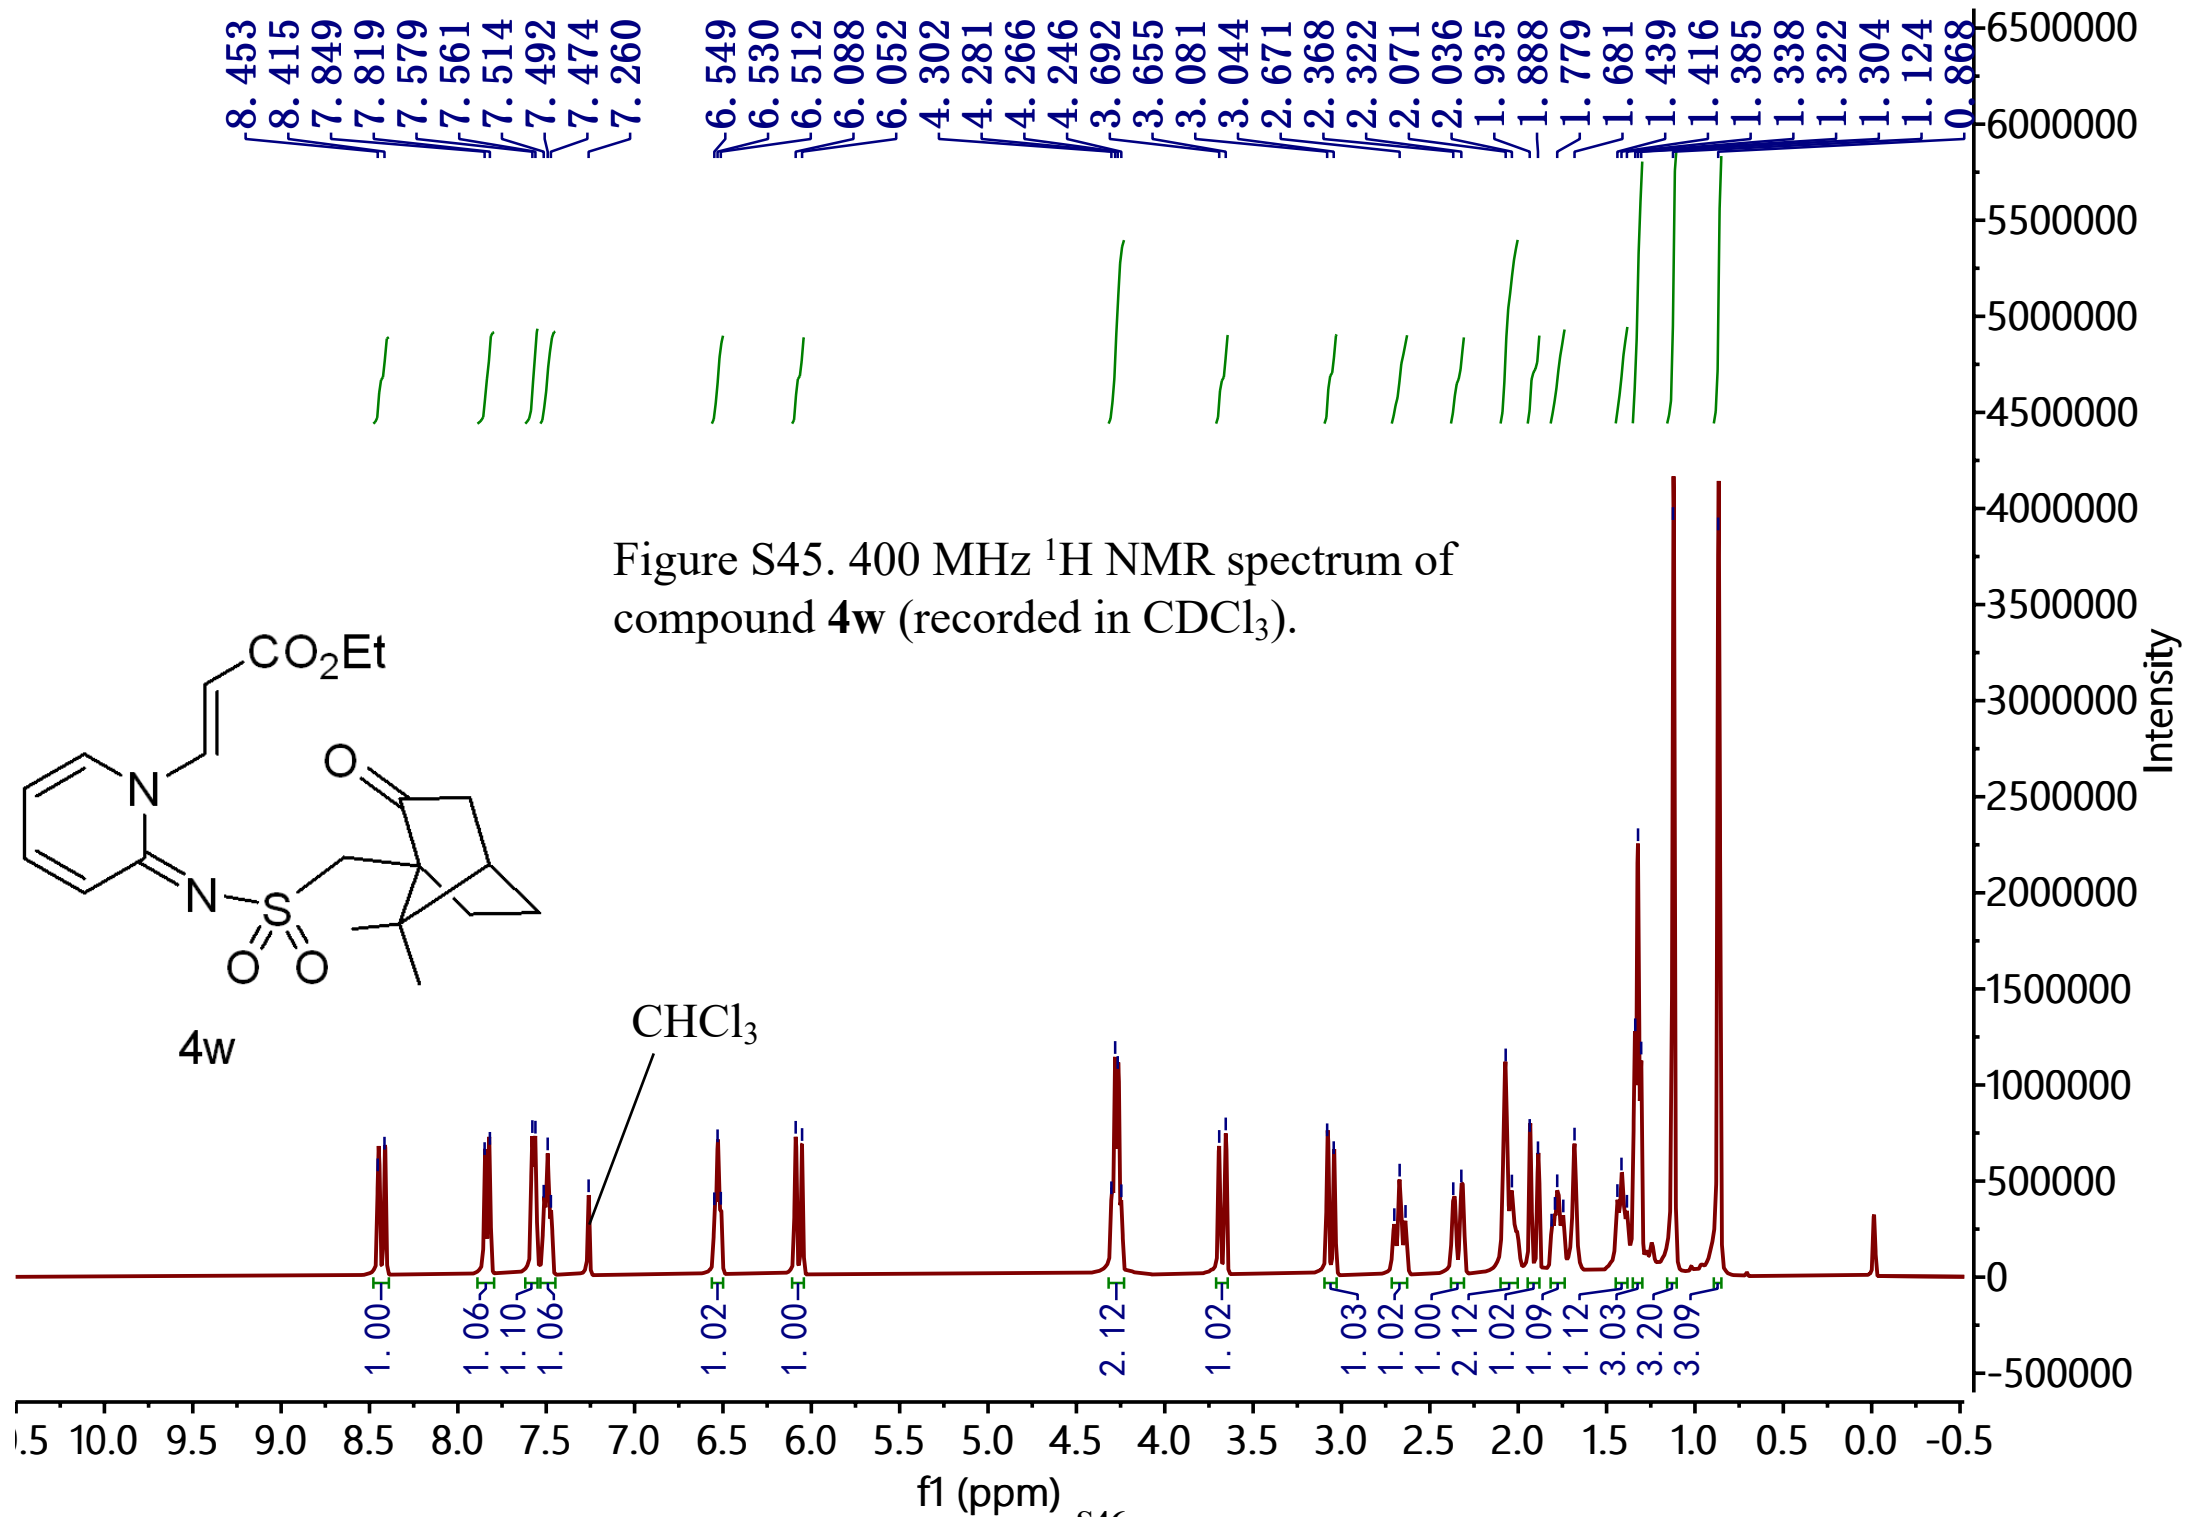

-215.506

-164.814

-155.331

140.685

140.479

133.434

119.597

114.145

110.852

77.480

77.162

76.845

61.414

58.491

50.824

48.241

42.827

42.746

27.164

24.605

20.073

19.942

14.337

Figure S46. 100 MHz  $^{13}\text{C}\{^1\text{H}\}$  NMR spectrum of compound **4w** (recorded in  $\text{CDCl}_3$ ).

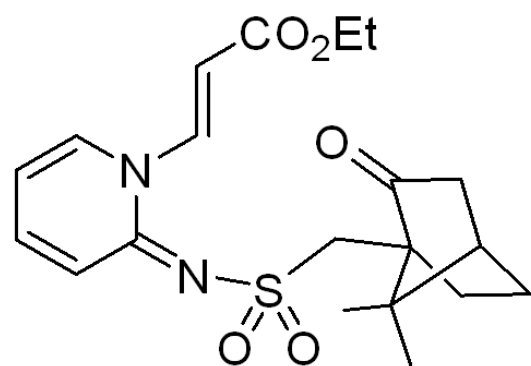**4w**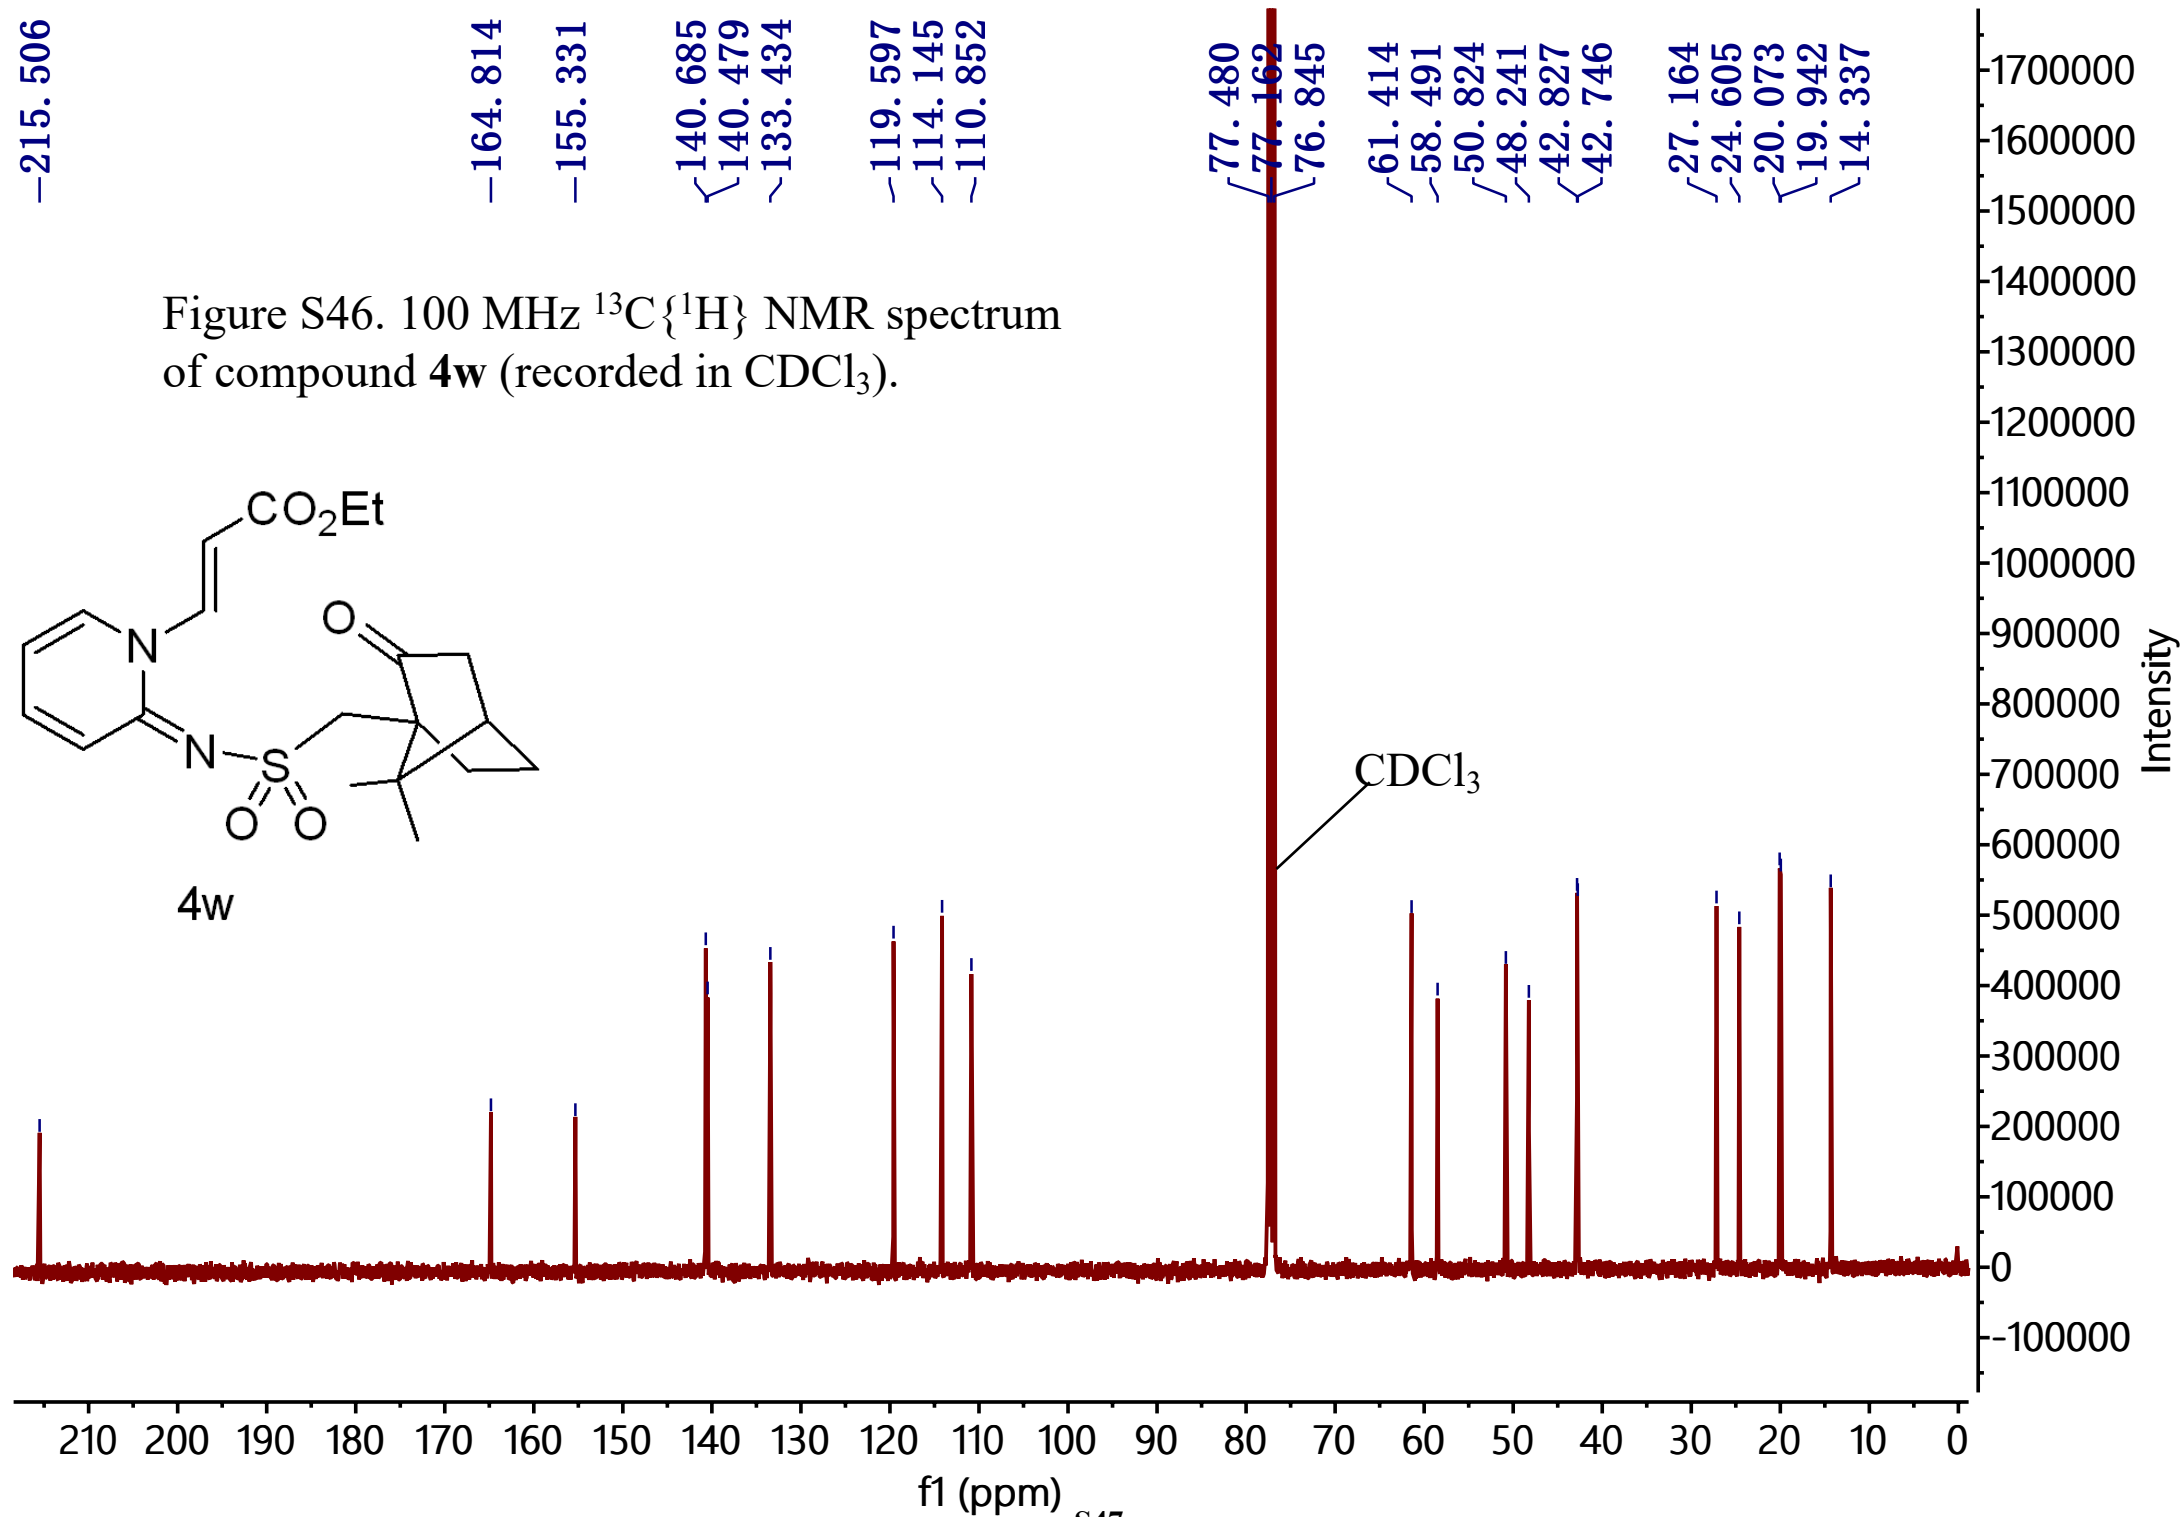

Supplement: s1 [file s1]
